# Supplementary material for: Proteomics-based screening of AKR1B1 as a therapeutic target and validation study for sepsis-associated acute kidney injury
Source: PeerJ journal article supplement (doi:10.7717/peerj.16709), 2024-01-02
Supplement: MIQE_checklist.pdf [file MIQE_checklist.pdf]

| ITEM TO CHECK                                                | IMPORTANCE | CHECKLIST    |
|--------------------------------------------------------------|------------|--------------|
| <b>EXPERIMENTAL DESIGN</b>                                   |            |              |
| Definition of experimental and control groups                | E          | Line 260-261 |
| Number within each group                                     | E          | Line 281-282 |
| Assay carried out by core lab or investigator's lab?         | D          | Line 261-262 |
| Acknowledgement of authors' contributions                    | D          | N/A          |
| <b>SAMPLE</b>                                                |            |              |
| Description                                                  | E          | Line 260-261 |
| Volume/mass of sample processed                              | D          | Line 263     |
| Microdissection or macrodissection                           | E          | Line 263     |
| Processing procedure                                         | E          | Line 262-265 |
| If frozen - how and how quickly?                             | E          | Line 262-265 |
| If fixed - with what, how quickly?                           | E          | N/A          |
| Sample storage conditions and duration (especially for FFPE) | E          | Line 263     |
| <b>NUCLEIC ACID EXTRACTION</b>                               |            |              |
| Procedure and/or instrumentation                             | E          | Line 264     |
| Name of kit and details of any modifications                 | E          | Line 264     |
| Source of additional reagents used                           | D          | Line 264     |
| Details of DNase or RNase treatment                          | E          | Line 265-267 |
| Contamination assessment (DNA or RNA)                        | E          | Line 265-266 |
| Nucleic acid quantification                                  | E          | Line 265-266 |
| Instrument and method                                        | E          | Line 265-266 |
| Purity (A260/A280)                                           | D          | Line 265-266 |
| Yield                                                        | D          | Line 265-266 |
| RNA integrity method/instrument                              | E          | Line 265-266 |
| RIN/RQI or Cq of 3' and 5' transcripts                       | E          | Line 265-266 |
| Electrophoresis traces                                       | D          | N/A          |
| Inhibition testing (Cq dilutions, spike or other)            | E          | Line 267-269 |
| <b>REVERSE TRANSCRIPTION</b>                                 |            |              |
| Complete reaction conditions                                 | E          | Line 269-270 |
| Amount of RNA and reaction volume                            | E          | Line 269-270 |
| Priming oligonucleotide (if using GSP) and concentration     | E          | Line 270     |
| Reverse transcriptase and concentration                      | E          | Line 268     |
| Temperature and time                                         | E          | Line 270-271 |
| Manufacturer of reagents and catalogue numbers               | D          | Line 267-269 |
| Cqs with and without RT                                      | D*         | N/A          |
| Storage conditions of cDNA                                   | D          | Line 271     |
| <b>qPCR TARGET INFORMATION</b>                               |            |              |
| If multiplex, efficiency and LOD of each assay.              | E          | Line 271     |
| Sequence accession number                                    | E          | Line 283-284 |
| Location of amplicon                                         | D          | Line 278-279 |
| Amplicon length                                              | E          | Line 279     |
| <i>In silico</i> specificity screen (BLAST, etc)             | E          | Line 279     |
| Pseudogenes, retropseudogenes or other homologs?             | D          | N/A          |
| Sequence alignment                                           | D          | Line 280     |
| Secondary structure analysis of amplicon                     | D          | N/A          |
| Location of each primer by exon or intron (if applicable)    | E          | Line 279     |
| What splice variants are targeted?                           | E          | Line 279     |
| <b>qPCR OLIGONUCLEOTIDES</b>                                 |            |              |
| Primer sequences                                             | E          | Line 279     |
| RTPrimerDB Identification Number                             | D          | N/A          |
| Probe sequences                                              | D**        | N/A          |
| Location and identity of any modifications                   | E          | Line 279     |
| Manufacturer of oligonucleotides                             | D          | N/A          |
| Purification method                                          | D          | N/A          |
| <b>qPCR PROTOCOL</b>                                         |            |              |
| Complete reaction conditions                                 | E          | Line 275-278 |
| Reaction volume and amount of cDNA/DNA                       | E          | Line 272-273 |
| Primer, (probe), Mg <sup>++</sup> and dNTP concentrations    | E          | Line 275     |
| Polymerase identity and concentration                        | E          | Line 274     |
| Buffer/kit identity and manufacturer                         | E          | Line 274     |
| Exact chemical constitution of the buffer                    | D          | Line 274     |
| Additives (SYBR Green I, DMSO, etc.)                         | E          | Line 274     |
| Manufacturer of plates/tubes and catalog number              | D          | Line 275     |
| Complete thermocycling parameters                            | E          | Line 275-277 |
| Reaction setup (manual/robotic)                              | D          | Line 275-277 |
| Manufacturer of qPCR instrument                              | E          | Line 272     |
| <b>qPCR VALIDATION</b>                                       |            |              |
| Evidence of optimisation (from gradients)                    | D          | N/A          |

|                                                          |   |              |
|----------------------------------------------------------|---|--------------|
| Specificity (gel, sequence, melt, or digest)             | E | Line 277-278 |
| For SYBR Green I, Cq of the NTC                          | E | Line 279     |
| Standard curves with slope and y-intercept               | E | Line 281-283 |
| PCR efficiency calculated from slope                     | E | Line 281-283 |
| Confidence interval for PCR efficiency or standard error | D | Line 281-283 |
| r2 of standard curve                                     | E | Line 281-283 |
| Linear dynamic range                                     | E | Line 283     |
| Cq variation at lower limit                              | E | Line 283-285 |
| Confidence intervals throughout range                    | D | Line 283-285 |
| Evidence for limit of detection                          | E | Line 283-285 |
| If multiplex, efficiency and LOD of each assay.          | E | Line 283-285 |
| <b>DATA ANALYSIS</b>                                     |   |              |
| qPCR analysis program (source, version)                  | E | Line 281-283 |
| Cq method determination                                  | E | Line 281-283 |
| Outlier identification and disposition                   | E | Line 281-283 |
| Results of NTCs                                          | E | Line 281-283 |
| Justification of number and choice of reference genes    | E | Line 281-283 |
| Description of normalisation method                      | E | Line 281-283 |
| Number and concordance of biological replicates          | D | Line 287-288 |
| Number and stage (RT or qPCR) of technical replicates    | E | Line 287-288 |
| Repeatability (intra-assay variation)                    | E | Line 285-286 |
| Reproducibility (inter-assay variation, %CV)             | D | Line 285-286 |
| Power analysis                                           | D | N/A          |
| Statistical methods for result significance              | E | Line 291-297 |
| Software (source, version)                               | E | Line 291-297 |
| Cq or raw data submission using RDML                     | D | N/A          |

**Table 1.** MIQE checklist for authors, reviewers and editors. All essential information (E) must be submitted with the manuscript. Desirable information (D) should be submitted if available. If using primers obtained from RTPrimerDB, information on qPCR target, oligonucleotides, protocols and validation is available from that source.

\*: Assessing the absence of DNA using a no RT assay is essential when first extracting RNA. Once the sample has been validated as RDNA-free, inclusion of a no-RT control is desirable, but no longer essential.

\*\*:. Disclosure of the probe sequence is highly desirable and strongly encouraged. However, since not all commercial pre-designed assay vendors provide this information, it cannot be an essential requirement. Use of such assays is advised against.
