# Supplementary material for: Proteomics-based screening of AKR1B1 as a therapeutic target and validation study for sepsis-associated acute kidney injury
Source: PeerJ journal article supplement (doi:10.7717/peerj.16709), 2024-01-02
Supplement: Raw_data.zip [file Figure 1A.xlsx]

## Sheet: Diff_distribution
Compared sample name	Up-regulated	Down-regulated
A/S	51	35
B/A	12	9
B/S	27	19
