# Supplementary material for: Proteomics-based screening of AKR1B1 as a therapeutic target and validation study for sepsis-associated acute kidney injury
Source: PeerJ journal article supplement (doi:10.7717/peerj.16709), 2024-01-02
Supplement: Raw_data.zip [file Figure 1B+1C.xlsx]

## Sheet: AvsS
Protein accession	Protein description	Gene name	A/S Ratio	A/S P value	Regulated Type	MW [kDa]	Coverage [%]	Peptides	Unique peptides	A1	A2	A3	B1	B2	B3	S1	S2	S3	Subcellular localization	KEGG KO No.	KEGG Gene	KEGG pathway	Biological Process	Cellular Component	Molecular Function	Pfam ID	Domain description	KOG category	KOG NO.	KOG description
A0A0G2JSN3	Transporter OS=Rattus norvegicus OX=10116 GN=Slc6a12 PE=1 SV=1	Slc6a12	2.9743	0.0364365	Up	71.256	5.9	3	2	0.644234	0.687148	1.19417	1.95847	2.28669	0.66321		0.34101	0.225077	plasma membrane	K05045	SLC6A12; solute carrier family 6 (neurotransmitter transporter, betaine/GABA) member 12	rno04727 GABAergic synapse; rno04721 Synaptic vesicle cycle	GO:0003333 amino acid transmembrane transport; GO:0006810 transport; GO:0006811 ion transport; GO:0006812 cation transport; GO:0006814 sodium ion transport; GO:0006820 anion transport; GO:0006836 neurotransmitter transport; GO:0006865 amino acid transport; GO:0006884 cell volume homeostasis; GO:0006950 response to stress; GO:0006970 response to osmotic stress; GO:0006972 hyperosmotic response; GO…	GO:0005623 cell; GO:0005886 plasma membrane; GO:0005887 integral component of plasma membrane; GO:0016020 membrane; GO:0016021 integral component of membrane; GO:0031224 intrinsic component of membrane; GO:0031226 intrinsic component of plasma membrane; GO:0071944 cell periphery;	GO:0005215 transporter activity; GO:0005283 amino acid:sodium symporter activity; GO:0005326 neurotransmitter transmembrane transporter activity; GO:0005328 neurotransmitter:sodium symporter activity; GO:0005332 gamma-aminobutyric acid:sodium symporter activity; GO:0005342 organic acid transmembrane transporter activity; GO:0005343 organic acid:sodium symporter activity; GO:0005416 amino acid:cat…			P	KOG3660	Sodium-neurotransmitter symporter
A0A0G2JTD1	Regulation of nuclear pre-mRNA domain-containing 2 OS=Rattus norvegicus OX=10116 GN=Rprd2 PE=1 SV=1	Rprd2	2.0189	0.00896799	Up	154.31	3.2	3	3	1.36507	1.20247	1.34352	0.81513		0.982349	0.555234		0.736236	nucleus				GO:0006139 nucleobase-containing compound metabolic process; GO:0006351 transcription, DNA-templated; GO:0006366 transcription by RNA polymerase II; GO:0006725 cellular aromatic compound metabolic process; GO:0006807 nitrogen compound metabolic process; GO:0008152 metabolic process; GO:0009058 biosynthetic process; GO:0009059 macromolecule biosynthetic process; GO:0009301 snRNA transcription; GO:…	GO:0000428 DNA-directed RNA polymerase complex; GO:0005622 intracellular; GO:0005623 cell; GO:0005634 nucleus; GO:0005654 nucleoplasm; GO:0016591 RNA polymerase II, holoenzyme; GO:0030880 RNA polymerase complex; GO:0031974 membrane-enclosed lumen; GO:0031981 nuclear lumen; GO:0032991 protein-containing complex; GO:0043226 organelle; GO:0043227 membrane-bounded organelle; GO:0043229 intracellular …				A	KOG2669	Regulator of nuclear mRNA
A0A0G2JY70	40S ribosomal protein S20 OS=Rattus norvegicus OX=10116 PE=1 SV=1	--	1.5129	0.0242384	Up	12.608	26.8	3	3	1.24221	1.34027	1.07603	1.02015	0.866278	1.03688	0.695872	0.969707	0.752609	cytoplasm									J	KOG0900	40S ribosomal protein S20
A0A0G2KAL4	Oxidation resistance protein 1 OS=Rattus norvegicus OX=10116 GN=Oxr1 PE=1 SV=1	Oxr1	1.7216	0.0214593	Up	84.125	6.2	3	3	1.19359	1.64408			0.805134	0.884829	0.83698	0.810158	0.825231	nucleus				GO:0006915 apoptotic process; GO:0006950 response to stress; GO:0006979 response to oxidative stress; GO:0007610 behavior; GO:0007626 locomotory behavior; GO:0007628 adult walking behavior; GO:0008152 metabolic process; GO:0008219 cell death; GO:0008344 adult locomotory behavior; GO:0009892 negative regulation of metabolic process; GO:0009987 cellular process; GO:0010605 negative regulation of ma…	GO:0005622 intracellular; GO:0005623 cell; GO:0005634 nucleus; GO:0005654 nucleoplasm; GO:0005730 nucleolus; GO:0031974 membrane-enclosed lumen; GO:0031981 nuclear lumen; GO:0043226 organelle; GO:0043227 membrane-bounded organelle; GO:0043228 non-membrane-bounded organelle; GO:0043229 intracellular organelle; GO:0043231 intracellular membrane-bounded organelle; GO:0043232 intracellular non-membra…	GO:0003824 catalytic activity; GO:0016491 oxidoreductase activity;	PF01476; PF07534	LysM domain; TLD	L	KOG2372	Oxidation resistance protein
A0A0G2JZL9	Endothelial cell-selective adhesion molecule OS=Rattus norvegicus OX=10116 GN=Esam PE=1 SV=1	Esam	1.5769	0.00945989	Up	39.945	12.5	3	3	1.13133	1.12066	1.2139	1.04712	0.958614	1.33041	0.711998	0.621256	0.864712	plasma membrane				GO:0002376 immune system process; GO:0006928 movement of cell or subcellular component; GO:0007155 cell adhesion; GO:0007156 homophilic cell adhesion via plasma membrane adhesion molecules; GO:0009987 cellular process; GO:0016338 calcium-independent cell-cell adhesion via plasma membrane cell-adhesion molecules; GO:0016477 cell migration; GO:0022610 biological adhesion; GO:0040011 locomotion; GO:…	GO:0005623 cell; GO:0005886 plasma membrane; GO:0005911 cell-cell junction; GO:0005912 adherens junction; GO:0005923 bicellular tight junction; GO:0016020 membrane; GO:0030054 cell junction; GO:0043296 apical junction complex; GO:0070160 tight junction; GO:0070161 anchoring junction; GO:0071944 cell periphery;		PF07686; PF13927	Immunoglobulin V-set domain; Immunoglobulin domain
A0A0G2KB70	RALBP1-associated Eps domain-containing 1 OS=Rattus norvegicus OX=10116 GN=Reps1 PE=1 SV=1	Reps1	1.7405	0.0391611	Up	66.374	5.4	3	3	1.30992	1.44317	1.02665	0.859576	1.11517	0.797802	0.807668	0.64005		nucleus	K20068			GO:0009987 cellular process; GO:0016043 cellular component organization; GO:0061024 membrane organization; GO:0071840 cellular component organization or biogenesis;	GO:0005622 intracellular; GO:0005623 cell; GO:0005737 cytoplasm; GO:0005829 cytosol; GO:0005886 plasma membrane; GO:0005905 clathrin-coated pit; GO:0012505 endomembrane system; GO:0016020 membrane; GO:0071944 cell periphery;	GO:0005488 binding; GO:0005515 protein binding; GO:0017124 SH3 domain binding; GO:0019904 protein domain specific binding;			U	KOG1955	Ral-GTPase effector RALBP1
A0A0G2K290	Ig-like domain-containing protein OS=Rattus norvegicus OX=10116 PE=4 SV=1	--	0.585	0.0137086	Down	13.905	30.6	3	2	1.02249	0.805243	0.801542	0.162108	1.21229		1.48289	1.51344		plasma membrane							PF07686	Immunoglobulin V-set domain
A0A0G2K4X5	Zinc fingers and homeoboxes protein 3 OS=Rattus norvegicus OX=10116 GN=Zhx3 PE=1 SV=1	Zhx3	1.642	4.75906e-05	Up	103.77	12	7	7	1.20784	1.18825	1.29071	1.00974	1.06411	0.994035	0.73888	0.747841	0.758596	mitochondria				GO:0000122 negative regulation of transcription by RNA polymerase II; GO:0006355 regulation of transcription, DNA-templated; GO:0006357 regulation of transcription by RNA polymerase II; GO:0009889 regulation of biosynthetic process; GO:0009890 negative regulation of biosynthetic process; GO:0009892 negative regulation of metabolic process; GO:0010468 regulation of gene expression; GO:0010556 regu…	GO:0005622 intracellular; GO:0005623 cell; GO:0005634 nucleus; GO:0005654 nucleoplasm; GO:0005737 cytoplasm; GO:0005938 cell cortex; GO:0031974 membrane-enclosed lumen; GO:0031981 nuclear lumen; GO:0043226 organelle; GO:0043227 membrane-bounded organelle; GO:0043229 intracellular organelle; GO:0043231 intracellular membrane-bounded organelle; GO:0043233 organelle lumen; GO:0070013 intracellular o…	GO:0000976 transcription regulatory region sequence-specific DNA binding; GO:0000977 RNA polymerase II transcription regulatory region sequence-specific DNA binding; GO:0000981 DNA-binding transcription factor activity, RNA polymerase II-specific; GO:0001067 regulatory region nucleic acid binding; GO:0001227 DNA-binding transcription repressor activity, RNA polymerase II-specific; GO:0003676 nucl…	PF00046	Homeobox domain
Q5XFV4	Adipocyte-type fatty acid-binding protein OS=Rattus norvegicus OX=10116 GN=Fabp4 PE=1 SV=1	Fabp4	2.021	0.00017687	Up	14.736	50.8	7	7	1.1991	1.35725	1.25897	1.14856	0.977643	1.17063	0.588442	0.628301	0.671102	cytoplasm				GO:0001816 cytokine production; GO:0001932 regulation of protein phosphorylation; GO:0001933 negative regulation of protein phosphorylation; GO:0006082 organic acid metabolic process; GO:0006355 regulation of transcription, DNA-templated; GO:0006469 negative regulation of protein kinase activity; GO:0006629 lipid metabolic process; GO:0006631 fatty acid metabolic process; GO:0006638 neutral lipid…	GO:0005622 intracellular; GO:0005623 cell; GO:0005634 nucleus; GO:0005654 nucleoplasm; GO:0005737 cytoplasm; GO:0005811 lipid droplet; GO:0005829 cytosol; GO:0031974 membrane-enclosed lumen; GO:0031981 nuclear lumen; GO:0043226 organelle; GO:0043227 membrane-bounded organelle; GO:0043228 non-membrane-bounded organelle; GO:0043229 intracellular organelle; GO:0043231 intracellular membrane-bounded …	GO:0005102 signaling receptor binding; GO:0005215 transporter activity; GO:0005319 lipid transporter activity; GO:0005324 long-chain fatty acid transporter activity; GO:0005488 binding; GO:0005504 fatty acid binding; GO:0005515 protein binding; GO:0008289 lipid binding; GO:0031406 carboxylic acid binding; GO:0033293 monocarboxylic acid binding; GO:0036041 long-chain fatty acid binding; GO:0036094…	PF00061	Lipocalin / cytosolic fatty-acid binding protein family	K	KOG4015	Fatty acid-binding protein FABP
A0A0G2K879	Cytochrome P450 2C11 OS=Rattus norvegicus OX=10116 GN=Cyp2c11 PE=1 SV=1	Cyp2c11	3.0361	0.0450283	Up	49.453	15.3	5	5	1.68116	1.49544	1.54818	0.724428	0.870449	0.642874		0.282508	0.754963	cytoplasm				GO:0001676 long-chain fatty acid metabolic process; GO:0006082 organic acid metabolic process; GO:0006629 lipid metabolic process; GO:0006631 fatty acid metabolic process; GO:0006690 icosanoid metabolic process; GO:0006805 xenobiotic metabolic process; GO:0008152 metabolic process; GO:0009410 response to xenobiotic stimulus; GO:0009987 cellular process; GO:0019369 arachidonic acid metabolic proce…	GO:0005622 intracellular; GO:0005623 cell; GO:0005737 cytoplasm; GO:0005783 endoplasmic reticulum; GO:0005789 endoplasmic reticulum membrane; GO:0012505 endomembrane system; GO:0016020 membrane; GO:0031090 organelle membrane; GO:0031984 organelle subcompartment; GO:0042175 nuclear outer membrane-endoplasmic reticulum membrane network; GO:0043226 organelle; GO:0043227 membrane-bounded organelle; G…	GO:0003824 catalytic activity; GO:0004497 monooxygenase activity; GO:0005488 binding; GO:0008144 drug binding; GO:0008390 testosterone 16-alpha-hydroxylase activity; GO:0008391 arachidonic acid monooxygenase activity; GO:0008392 arachidonic acid epoxygenase activity; GO:0008395 steroid hydroxylase activity; GO:0016491 oxidoreductase activity; GO:0016705 oxidoreductase activity, acting on paired d…	PF00067	Cytochrome P450	Q	KOG0156	Cytochrome P450 CYP2 subfamily
A0A0G2K8F6	Alpha-mannosidase OS=Rattus norvegicus OX=10116 GN=Man2b2 PE=1 SV=1	Man2b2	0.3702	0.0161651	Down	114.87	7.1	5	5	0.638382		0.404927	0.729306			1.50823	1.5516	1.16755	mitochondria	K12312	MAN2B2; epididymis-specific alpha-mannosidase [EC:3.2.1.24]	rno00511 Other glycan degradation	GO:0005975 carbohydrate metabolic process; GO:0005996 monosaccharide metabolic process; GO:0006013 mannose metabolic process; GO:0006464 cellular protein modification process; GO:0006517 protein deglycosylation; GO:0006807 nitrogen compound metabolic process; GO:0008152 metabolic process; GO:0009056 catabolic process; GO:0009100 glycoprotein metabolic process; GO:0009311 oligosaccharide metabolic…	GO:0000323 lytic vacuole; GO:0005576 extracellular region; GO:0005622 intracellular; GO:0005623 cell; GO:0005737 cytoplasm; GO:0005764 lysosome; GO:0005773 vacuole; GO:0005775 vacuolar lumen; GO:0031974 membrane-enclosed lumen; GO:0043202 lysosomal lumen; GO:0043226 organelle; GO:0043227 membrane-bounded organelle; GO:0043229 intracellular organelle; GO:0043231 intracellular membrane-bounded orga…	GO:0003824 catalytic activity; GO:0004553 hydrolase activity, hydrolyzing O-glycosyl compounds; GO:0004559 alpha-mannosidase activity; GO:0008496 mannan endo-1,6-alpha-mannosidase activity; GO:0015923 mannosidase activity; GO:0016787 hydrolase activity; GO:0016798 hydrolase activity, acting on glycosyl bonds;	PF01074; PF09261; PF07748	Glycosyl hydrolases family 38 N-terminal domain; Alpha mannosidase, middle domain; Glycosyl hydrolases family 38 C-terminal domain	G	KOG1959	Glycosyl hydrolase, family 38 - alpha-mannosidase
A0A0H2UHI5	Serine protease inhibitor A3N OS=Rattus norvegicus OX=10116 GN=Serpina3n PE=1 SV=1	Serpina3n	1.7281	6.42626e-06	Up	45.481	48.8	20	9	1.21722	1.19194	1.15949	1.12936	1.11971	1.11722	0.674636	0.699476	0.690942	endoplasmic reticulum	K04525			GO:0001775 cell activation; GO:0001894 tissue homeostasis; GO:0002237 response to molecule of bacterial origin; GO:0002252 immune effector process; GO:0002263 cell activation involved in immune response; GO:0002274 myeloid leukocyte activation; GO:0002275 myeloid cell activation involved in immune response; GO:0002283 neutrophil activation involved in immune response; GO:0002366 leukocyte activat…	GO:0000323 lytic vacuole; GO:0005576 extracellular region; GO:0005615 extracellular space; GO:0005622 intracellular; GO:0005623 cell; GO:0005634 nucleus; GO:0005737 cytoplasm; GO:0005764 lysosome; GO:0005766 primary lysosome; GO:0005773 vacuole; GO:0005775 vacuolar lumen; GO:0012505 endomembrane system; GO:0030141 secretory granule; GO:0031091 platelet alpha granule; GO:0031093 platelet alpha gra…	GO:0003676 nucleic acid binding; GO:0003677 DNA binding; GO:0004857 enzyme inhibitor activity; GO:0004866 endopeptidase inhibitor activity; GO:0004867 serine-type endopeptidase inhibitor activity; GO:0004869 cysteine-type endopeptidase inhibitor activity; GO:0005488 binding; GO:0030234 enzyme regulator activity; GO:0030414 peptidase inhibitor activity; GO:0061134 peptidase regulator activity; GO:…	PF00079	Serpin (serine protease inhibitor)	V	KOG2392	Serpin
A0A0G2K9Y7	Carboxylic ester hydrolase OS=Rattus norvegicus OX=10116 GN=LOC501233 PE=1 SV=1	LOC501233	2.9583	0.000674661	Up	59.841	34.4	15	2	1.46471	1.4263	1.57521	0.950115	0.929815	1.14411	0.420452	0.476079	0.613204	cytoplasm					GO:0005622 intracellular; GO:0005623 cell; GO:0005737 cytoplasm; GO:0005783 endoplasmic reticulum; GO:0005788 endoplasmic reticulum lumen; GO:0012505 endomembrane system; GO:0031974 membrane-enclosed lumen; GO:0043226 organelle; GO:0043227 membrane-bounded organelle; GO:0043229 intracellular organelle; GO:0043231 intracellular membrane-bounded organelle; GO:0043233 organelle lumen; GO:0070013 int…	GO:0003824 catalytic activity; GO:0016289 CoA hydrolase activity; GO:0016290 palmitoyl-CoA hydrolase activity; GO:0016787 hydrolase activity; GO:0016788 hydrolase activity, acting on ester bonds; GO:0016790 thiolester hydrolase activity; GO:0047617 acyl-CoA hydrolase activity; GO:0052689 carboxylic ester hydrolase activity;	PF00135	Carboxylesterase family	I	KOG1516	Carboxylesterase and related proteins
A0A0H2UHF8	Alpha-1-acid glycoprotein OS=Rattus norvegicus OX=10116 GN=Orm1 PE=1 SV=1	Orm1	2.8344	7.77657e-05	Up	26.711	33.2	8	8	1.51369	1.28593	1.34803	1.16505	0.948888	1.27509	0.471366	0.52734	0.464612	extracellular	K17308			GO:0001101 response to acid chemical; GO:0001775 cell activation; GO:0001817 regulation of cytokine production; GO:0001818 negative regulation of cytokine production; GO:0001819 positive regulation of cytokine production; GO:0002237 response to molecule of bacterial origin; GO:0002252 immune effector process; GO:0002263 cell activation involved in immune response; GO:0002274 myeloid leukocyte act…	GO:0000323 lytic vacuole; GO:0005576 extracellular region; GO:0005615 extracellular space; GO:0005622 intracellular; GO:0005623 cell; GO:0005737 cytoplasm; GO:0005764 lysosome; GO:0005766 primary lysosome; GO:0005773 vacuole; GO:0005775 vacuolar lumen; GO:0012505 endomembrane system; GO:0030141 secretory granule; GO:0031091 platelet alpha granule; GO:0031093 platelet alpha granule lumen; GO:00314…	GO:0005488 binding; GO:0008144 drug binding;	PF00061	Lipocalin / cytosolic fatty-acid binding protein family
A0A140TAD8	Natural resistance-associated macrophage protein 2 OS=Rattus norvegicus OX=10116 GN=Slc11a2 PE=1 SV=1	Slc11a2	1.6576	0.0349836	Up	64.544	3.9	2	2	1.3153		1.40237	0.920479	0.652822	1.24977	0.654288	0.909799	0.895168	plasma membrane	K21398	SLC11A2; natural resistance-associated macrophage protein 2	rno04216 Ferroptosis; rno04142 Lysosome; rno04978 Mineral absorption	GO:0000041 transition metal ion transport; GO:0000902 cell morphogenesis; GO:0000904 cell morphogenesis involved in differentiation; GO:0001666 response to hypoxia; GO:0002262 myeloid cell homeostasis; GO:0002376 immune system process; GO:0002520 immune system development; GO:0003008 system process; GO:0003032 detection of oxygen; GO:0006725 cellular aromatic compound metabolic process; GO:000677…	GO:0000323 lytic vacuole; GO:0005576 extracellular region; GO:0005622 intracellular; GO:0005623 cell; GO:0005634 nucleus; GO:0005737 cytoplasm; GO:0005739 mitochondrion; GO:0005764 lysosome; GO:0005765 lysosomal membrane; GO:0005768 endosome; GO:0005769 early endosome; GO:0005770 late endosome; GO:0005773 vacuole; GO:0005774 vacuolar membrane; GO:0005794 Golgi apparatus; GO:0005802 trans-Golgi ne…	GO:0005215 transporter activity; GO:0005375 copper ion transmembrane transporter activity; GO:0005381 iron ion transmembrane transporter activity; GO:0005384 manganese ion transmembrane transporter activity; GO:0005385 zinc ion transmembrane transporter activity; GO:0005488 binding; GO:0005506 iron ion binding; GO:0005507 copper ion binding; GO:0008270 zinc ion binding; GO:0008324 cation transmem…			P	KOG1291	Mn2+ and Fe2+ transporters of the NRAMP family
B0BND0	Glycerophosphocholine cholinephosphodiesterase ENPP6 OS=Rattus norvegicus OX=10116 GN=Enpp6 PE=1 SV=1	Enpp6	1.6608	7.01854e-05	Up	50.701	35.7	13	13	1.24138	1.23148	1.15025	1.0279	1.10444	1.06306	0.735695	0.743406	0.70239	peroxisome	K08743	ENPP6; ectonucleotide pyrophosphatase/phosphodiesterase family member 6 [EC:3.1.4.-]	rno00565 Ether lipid metabolism	GO:0001505 regulation of neurotransmitter levels; GO:0006629 lipid metabolic process; GO:0006644 phospholipid metabolic process; GO:0006650 glycerophospholipid metabolic process; GO:0006793 phosphorus metabolic process; GO:0006796 phosphate-containing compound metabolic process; GO:0006807 nitrogen compound metabolic process; GO:0008152 metabolic process; GO:0009056 catabolic process; GO:0009395 …	GO:0005576 extracellular region; GO:0005623 cell; GO:0005886 plasma membrane; GO:0016020 membrane; GO:0071944 cell periphery;	GO:0003824 catalytic activity; GO:0008081 phosphoric diester hydrolase activity; GO:0008889 glycerophosphodiester phosphodiesterase activity; GO:0016787 hydrolase activity; GO:0016788 hydrolase activity, acting on ester bonds; GO:0042578 phosphoric ester hydrolase activity; GO:0047390 glycerophosphocholine cholinephosphodiesterase activity;			S	KOG2645	Type I phosphodiesterase/nucleotide pyrophosphatase
B0BNN3	Carbonic anhydrase 1 OS=Rattus norvegicus OX=10116 GN=Ca1 PE=1 SV=1	Ca1	0.6497	3.76479e-06	Down	28.299	73.6	13	13	0.796765	0.790023	0.775927	0.995267	0.997412	1.00791	1.19446	1.23322	1.20901	cytoplasm	K01672	CA; carbonic anhydrase [EC:4.2.1.1]	rno01100 Metabolic pathways; rno00910 Nitrogen metabolism	GO:0006810 transport; GO:0006811 ion transport; GO:0006820 anion transport; GO:0007154 cell communication; GO:0007165 signal transduction; GO:0007166 cell surface receptor signaling pathway; GO:0009987 cellular process; GO:0010033 response to organic substance; GO:0015701 bicarbonate transport; GO:0015711 organic anion transport; GO:0019221 cytokine-mediated signaling pathway; GO:0023052 signalin…	GO:0005622 intracellular; GO:0005623 cell; GO:0005737 cytoplasm; GO:0005829 cytosol;	GO:0003824 catalytic activity; GO:0004064 arylesterase activity; GO:0004089 carbonate dehydratase activity; GO:0016787 hydrolase activity; GO:0016788 hydrolase activity, acting on ester bonds; GO:0016829 lyase activity; GO:0016835 carbon-oxygen lyase activity; GO:0016836 hydro-lyase activity; GO:0052689 carboxylic ester hydrolase activity;	PF00194	Eukaryotic-type carbonic anhydrase	P	KOG0382	Carbonic anhydrase
B2GV65	HIG1 domain family, member 2A OS=Rattus norvegicus OX=10116 GN=Higd2a PE=2 SV=1	Higd2a	0.5758	0.000943756	Down	11.43	56.6	3	3	0.813285	0.705995	0.752387	0.970148	0.928901	0.884372	1.25497	1.44394	1.24601	plasma membrane				GO:0006996 organelle organization; GO:0007005 mitochondrion organization; GO:0009987 cellular process; GO:0010941 regulation of cell death; GO:0016043 cellular component organization; GO:0022607 cellular component assembly; GO:0034622 cellular protein-containing complex assembly; GO:0042981 regulation of apoptotic process; GO:0043066 negative regulation of apoptotic process; GO:0043067 regulation…					S	KOG4431	Uncharacterized protein, induced by hypoxia
B5DF07	Mitochondrial ribonuclease P catalytic subunit OS=Rattus norvegicus OX=10116 GN=Prorp PE=2 SV=1	Prorp	1.62	0.00469862	Up	67.007	4.1	2	2	1.16152	1.11157	1.07417	1.19263	1.08353	0.999126	0.740885	0.636563		mitochondria	K17655			GO:0000959 mitochondrial RNA metabolic process; GO:0000963 mitochondrial RNA processing; GO:0000964 mitochondrial RNA 5'-end processing; GO:0000966 RNA 5'-end processing; GO:0001682 tRNA 5'-leader removal; GO:0006139 nucleobase-containing compound metabolic process; GO:0006396 RNA processing; GO:0006399 tRNA metabolic process; GO:0006725 cellular aromatic compound metabolic process; GO:0006807 ni…	GO:0005622 intracellular; GO:0005623 cell; GO:0005634 nucleus; GO:0005737 cytoplasm; GO:0005739 mitochondrion; GO:0005759 mitochondrial matrix; GO:0009295 nucleoid; GO:0030677 ribonuclease P complex; GO:0030678 mitochondrial ribonuclease P complex; GO:0031974 membrane-enclosed lumen; GO:0032991 protein-containing complex; GO:0042645 mitochondrial nucleoid; GO:0043226 organelle; GO:0043227 membran…	GO:0003824 catalytic activity; GO:0004518 nuclease activity; GO:0004519 endonuclease activity; GO:0004521 endoribonuclease activity; GO:0004526 ribonuclease P activity; GO:0004540 ribonuclease activity; GO:0004549 tRNA-specific ribonuclease activity; GO:0016787 hydrolase activity; GO:0016788 hydrolase activity, acting on ester bonds; GO:0016891 endoribonuclease activity, producing 5'-phosphomonoe…
B5DF57	Erythrocyte membrane protein band 4.2 OS=Rattus norvegicus OX=10116 GN=Epb42 PE=1 SV=1	Epb42	0.6274	0.000711873	Down	76.5	26	12	12	0.752381	0.805551	0.775452	0.928609	0.995951	1.02298	1.30041	1.1303	1.28837	cytoplasm				GO:0000902 cell morphogenesis; GO:0002376 immune system process; GO:0002520 immune system development; GO:0006807 nitrogen compound metabolic process; GO:0006996 organelle organization; GO:0007010 cytoskeleton organization; GO:0007275 multicellular organism development; GO:0008152 metabolic process; GO:0009653 anatomical structure morphogenesis; GO:0009987 cellular process; GO:0016043 cellular co…	GO:0005622 intracellular; GO:0005623 cell; GO:0005737 cytoplasm; GO:0005856 cytoskeleton; GO:0005886 plasma membrane; GO:0005938 cell cortex; GO:0016020 membrane; GO:0030863 cortical cytoskeleton; GO:0043226 organelle; GO:0043228 non-membrane-bounded organelle; GO:0043229 intracellular organelle; GO:0043232 intracellular non-membrane-bounded organelle; GO:0071944 cell periphery; GO:0099568 cytopl…	GO:0000166 nucleotide binding; GO:0005198 structural molecule activity; GO:0005200 structural constituent of cytoskeleton; GO:0005488 binding; GO:0005524 ATP binding; GO:0008144 drug binding; GO:0017076 purine nucleotide binding; GO:0030554 adenyl nucleotide binding; GO:0032553 ribonucleotide binding; GO:0032555 purine ribonucleotide binding; GO:0032559 adenyl ribonucleotide binding; GO:0035639 p…	PF00868; PF00927	Transglutaminase family; Transglutaminase family, C-terminal ig like domain
D3Z8I9	Myosin XIX OS=Rattus norvegicus OX=10116 GN=Myo19 PE=3 SV=1	Myo19	1.5713	0.0302079	Up	108.27	11	8	8	1.22964	1.15887	1.0843	0.916248	1.22374	1.17708	0.550958	0.85893	0.800247	nucleus				GO:0006810 transport; GO:0006928 movement of cell or subcellular component; GO:0009987 cellular process; GO:0010564 regulation of cell cycle process; GO:0010821 regulation of mitochondrion organization; GO:0022603 regulation of anatomical structure morphogenesis; GO:0030029 actin filament-based process; GO:0030048 actin filament-based movement; GO:0030705 cytoskeleton-dependent intracellular tran…	GO:0005622 intracellular; GO:0005623 cell; GO:0005737 cytoplasm; GO:0005739 mitochondrion; GO:0005740 mitochondrial envelope; GO:0005741 mitochondrial outer membrane; GO:0005829 cytosol; GO:0016020 membrane; GO:0019867 outer membrane; GO:0031090 organelle membrane; GO:0031966 mitochondrial membrane; GO:0031967 organelle envelope; GO:0031968 organelle outer membrane; GO:0031975 envelope; GO:004322…	GO:0000146 microfilament motor activity; GO:0003774 motor activity; GO:0003779 actin binding; GO:0003824 catalytic activity; GO:0005488 binding; GO:0005515 protein binding; GO:0008092 cytoskeletal protein binding; GO:0016462 pyrophosphatase activity; GO:0016787 hydrolase activity; GO:0016817 hydrolase activity, acting on acid anhydrides; GO:0016818 hydrolase activity, acting on acid anhydrides, i…	PF00063	Myosin head (motor domain)	Z	KOG0160	Myosin class V heavy chain
D3Z9Z0	Ankyrin 1 OS=Rattus norvegicus OX=10116 GN=Ank1 PE=1 SV=1	Ank1	0.6561	5.13649e-05	Down	187.12	25.5	29	25	0.792753	0.817389	0.773483	0.986489	0.988624	1.00838	1.22803	1.17163	1.23322	nucleus	K10380	ANK; ankyrin	rno05205 Proteoglycans in cancer	GO:0002262 myeloid cell homeostasis; GO:0002376 immune system process; GO:0002520 immune system development; GO:0006725 cellular aromatic compound metabolic process; GO:0006778 porphyrin-containing compound metabolic process; GO:0006779 porphyrin-containing compound biosynthetic process; GO:0006807 nitrogen compound metabolic process; GO:0006810 transport; GO:0006811 ion transport; GO:0006812 cat…	GO:0005622 intracellular; GO:0005623 cell; GO:0005634 nucleus; GO:0005737 cytoplasm; GO:0005783 endoplasmic reticulum; GO:0005829 cytosol; GO:0005856 cytoskeleton; GO:0005886 plasma membrane; GO:0005938 cell cortex; GO:0012505 endomembrane system; GO:0014731 spectrin-associated cytoskeleton; GO:0016020 membrane; GO:0016323 basolateral plasma membrane; GO:0016528 sarcoplasm; GO:0016529 sarcoplasmi…	GO:0005198 structural molecule activity; GO:0005200 structural constituent of cytoskeleton; GO:0005488 binding; GO:0005515 protein binding; GO:0008092 cytoskeletal protein binding; GO:0008093 cytoskeletal anchor activity; GO:0019899 enzyme binding; GO:0030507 spectrin binding; GO:0030674 protein-macromolecule adaptor activity; GO:0051117 ATPase binding; GO:0060090 molecular adaptor activity;			M	KOG4177	Ankyrin
D3ZD40	Papilin, proteoglycan-like sulfated glycoprotein OS=Rattus norvegicus OX=10116 GN=Papln PE=1 SV=2	Papln	0.6132	0.0101166	Down	138.6	5.8	5	5	0.71161		0.581538	1.19289	1.34579	1.00498	1.00046	1.0516	1.11113	extracellular	K23624				GO:0005576 extracellular region; GO:0005604 basement membrane; GO:0031012 extracellular matrix; GO:0062023 collagen-containing extracellular matrix;		PF00090; PF00014; PF07679; PF13927; PF08686	Thrombospondin type 1 domain; Kunitz/Bovine pancreatic trypsin inhibitor domain; Immunoglobulin I-set domain; Immunoglobulin domain; PLAC (protease and lacunin) domain	OT	KOG4597	Serine proteinase inhibitor (KU family) with thrombospondin repeats
D3ZF26	Tankyrase 1-binding protein 1 OS=Rattus norvegicus OX=10116 GN=Tnks1bp1 PE=1 SV=1	Tnks1bp1	1.8698	7.8877e-05	Up	180.01	17.2	17	17	1.29129	1.36304	1.26396	0.914375	1.03738	1.03434	0.65864	0.73077	0.706203	nucleus				GO:0000075 cell cycle checkpoint; GO:0000077 DNA damage checkpoint; GO:0000278 mitotic cell cycle; GO:0000288 nuclear-transcribed mRNA catabolic process, deadenylation-dependent decay; GO:0000289 nuclear-transcribed mRNA poly(A) tail shortening; GO:0000723 telomere maintenance; GO:0000956 nuclear-transcribed mRNA catabolic process; GO:0001932 regulation of protein phosphorylation; GO:0001934 posi…	GO:0000228 nuclear chromosome; GO:0000785 chromatin; GO:0000790 nuclear chromatin; GO:0000792 heterochromatin; GO:0005622 intracellular; GO:0005623 cell; GO:0005634 nucleus; GO:0005694 chromosome; GO:0005720 nuclear heterochromatin; GO:0005737 cytoplasm; GO:0005829 cytosol; GO:0005856 cytoskeleton; GO:0005911 cell-cell junction; GO:0005912 adherens junction; GO:0030014 CCR4-NOT complex; GO:003005…	GO:0005488 binding; GO:0005515 protein binding; GO:0019899 enzyme binding; GO:0019904 protein domain specific binding; GO:0044877 protein-containing complex binding; GO:0071532 ankyrin repeat binding;
D3ZFS7	Lysophospholipase-like 1 OS=Rattus norvegicus OX=10116 GN=Lyplal1 PE=3 SV=2	Lyplal1	1.7817	3.34315e-05	Up	26.069	64.3	9	9	1.65426	1.66061	1.61897	0.458824	0.446611	0.391599	0.966181	0.879693	0.923245	mitochondria	K06999			GO:0002084 protein depalmitoylation; GO:0006464 cellular protein modification process; GO:0006807 nitrogen compound metabolic process; GO:0008152 metabolic process; GO:0009056 catabolic process; GO:0009057 macromolecule catabolic process; GO:0009987 cellular process; GO:0019538 protein metabolic process; GO:0030163 protein catabolic process; GO:0032879 regulation of localization; GO:0032880 regul…	GO:0005622 intracellular; GO:0005623 cell; GO:0005737 cytoplasm; GO:0005829 cytosol;	GO:0003824 catalytic activity; GO:0004620 phospholipase activity; GO:0004622 lysophospholipase activity; GO:0008474 palmitoyl-(protein) hydrolase activity; GO:0016298 lipase activity; GO:0016787 hydrolase activity; GO:0016788 hydrolase activity, acting on ester bonds; GO:0016790 thiolester hydrolase activity; GO:0052689 carboxylic ester hydrolase activity; GO:0098599 palmitoyl hydrolase activity;…	PF02230	Phospholipase/Carboxylesterase	I	KOG2112	Lysophospholipase
D3ZPF0	Four and a half LIM domains 3 OS=Rattus norvegicus OX=10116 GN=Fhl3 PE=1 SV=1	Fhl3	1.5056	0.00170953	Up	31.767	20.5	4	4	1.20234	1.14641	1.3707	0.955818	0.884342	0.969999	0.839944	0.815902	0.814557	nucleus	K24414			GO:0006996 organelle organization; GO:0007010 cytoskeleton organization; GO:0007275 multicellular organism development; GO:0007517 muscle organ development; GO:0009987 cellular process; GO:0016043 cellular component organization; GO:0030029 actin filament-based process; GO:0030036 actin cytoskeleton organization; GO:0032501 multicellular organismal process; GO:0032502 developmental process; GO:00…	GO:0001725 stress fiber; GO:0005622 intracellular; GO:0005623 cell; GO:0005634 nucleus; GO:0005737 cytoplasm; GO:0005856 cytoskeleton; GO:0015629 actin cytoskeleton; GO:0030016 myofibril; GO:0030017 sarcomere; GO:0030018 Z disc; GO:0031674 I band; GO:0032432 actin filament bundle; GO:0042641 actomyosin; GO:0043226 organelle; GO:0043227 membrane-bounded organelle; GO:0043228 non-membrane-bounded o…	GO:0003779 actin binding; GO:0005488 binding; GO:0005515 protein binding; GO:0008092 cytoskeletal protein binding;	PF00412	LIM domain	TZ	KOG1704	FOG: LIM domain
D3ZQD3	Oxoglutarate dehydrogenase L OS=Rattus norvegicus OX=10116 GN=Ogdhl PE=1 SV=2	Ogdhl	0.5767	0.00503513	Down	114.64	21.5	19	10	0.567207	0.795365	0.70573	1.08147	1.20596	1.05795	1.19878	1.16171	1.22583	mitochondria	K00164	OGDH; 2-oxoglutarate dehydrogenase E1 component [EC:1.2.4.2]	rno01100 Metabolic pathways; rno00020 Citrate cycle (TCA cycle); rno01200 Carbon metabolism				PF02779	Transketolase, pyrimidine binding domain	G	KOG0450	2-oxoglutarate dehydrogenase, E1 subunit
D3ZYY0	Short chain dehydrogenase/reductase family 39U, member 1 OS=Rattus norvegicus OX=10116 GN=Sdr39u1 PE=1 SV=1	Sdr39u1	1.5013	0.0086352	Up	31.943	12.1	3	3	1.32162	1.31575	1.04364	0.981751	0.990134	0.89529	0.864566	0.780814	0.806438	cytoplasm	K07071								F	KOG3019	Predicted nucleoside-diphosphate sugar epimerase
D4A071	Serine hydrolase-like 2 OS=Rattus norvegicus OX=10116 GN=Serhl2 PE=4 SV=1	Serhl2	0.4611	0.00230469	Down	35.478	39.7	8	8	0.463499	0.514032	0.660872	1.25127	1.21823	1.33847	1.11485	1.15551	1.28327	cytoplasm					GO:0005622 intracellular; GO:0005623 cell; GO:0005737 cytoplasm; GO:0005777 peroxisome; GO:0031410 cytoplasmic vesicle; GO:0031982 vesicle; GO:0042579 microbody; GO:0043226 organelle; GO:0043227 membrane-bounded organelle; GO:0043229 intracellular organelle; GO:0043231 intracellular membrane-bounded organelle; GO:0048471 perinuclear region of cytoplasm; GO:0097708 intracellular vesicle;	GO:0003824 catalytic activity; GO:0016787 hydrolase activity;	PF00561	alpha/beta hydrolase fold	S	KOG1454	Predicted hydrolase/acyltransferase (alpha/beta hydrolase superfamily)
D4A1Q2	Microtubule-associated protein OS=Rattus norvegicus OX=10116 GN=Mapt PE=1 SV=1	Mapt	1.5471	0.000350599	Up	71.764	34.4	15	4	1.131	1.19354	1.18914	1.11432	1.011	1.08987	0.737305	0.8097	0.724122	nucleus				GO:0000003 reproduction; GO:0000226 microtubule cytoskeleton organization; GO:0000302 response to reactive oxygen species; GO:0000902 cell morphogenesis; GO:0000904 cell morphogenesis involved in differentiation; GO:0001558 regulation of cell growth; GO:0001764 neuron migration; GO:0001774 microglial cell activation; GO:0001775 cell activation; GO:0002274 myeloid leukocyte activation; GO:0002376 …	GO:0005576 extracellular region; GO:0005622 intracellular; GO:0005623 cell; GO:0005634 nucleus; GO:0005654 nucleoplasm; GO:0005737 cytoplasm; GO:0005739 mitochondrion; GO:0005829 cytosol; GO:0005856 cytoskeleton; GO:0005874 microtubule; GO:0005875 microtubule associated complex; GO:0005886 plasma membrane; GO:0005929 cilium; GO:0005930 axoneme; GO:0009898 cytoplasmic side of plasma membrane; GO:0…	GO:0003676 nucleic acid binding; GO:0003677 DNA binding; GO:0003680 AT DNA binding; GO:0003690 double-stranded DNA binding; GO:0003697 single-stranded DNA binding; GO:0003723 RNA binding; GO:0003779 actin binding; GO:0005102 signaling receptor binding; GO:0005488 binding; GO:0005515 protein binding; GO:0005543 phospholipid binding; GO:0008017 microtubule binding; GO:0008092 cytoskeletal protein b…			Z	KOG2418	Microtubule-associated protein TAU
D4A5T8	Periplakin OS=Rattus norvegicus OX=10116 GN=Ppl PE=1 SV=1	Ppl	1.7107	2.11409e-07	Up	204.14	31.9	44	43	1.19331	1.17999	1.21006	1.05487	1.10859	1.15847	0.699654	0.697943	0.697114	nucleus	K10386			GO:0006996 organelle organization; GO:0007010 cytoskeleton organization; GO:0007275 multicellular organism development; GO:0008219 cell death; GO:0008544 epidermis development; GO:0009605 response to external stimulus; GO:0009612 response to mechanical stimulus; GO:0009628 response to abiotic stimulus; GO:0009888 tissue development; GO:0009913 epidermal cell differentiation; GO:0009987 cellular p…	GO:0001533 cornified envelope; GO:0005622 intracellular; GO:0005623 cell; GO:0005634 nucleus; GO:0005737 cytoplasm; GO:0005739 mitochondrion; GO:0005829 cytosol; GO:0005856 cytoskeleton; GO:0005886 plasma membrane; GO:0005911 cell-cell junction; GO:0016020 membrane; GO:0019897 extrinsic component of plasma membrane; GO:0019898 extrinsic component of membrane; GO:0030054 cell junction; GO:0030057 …	GO:0005198 structural molecule activity; GO:0005200 structural constituent of cytoskeleton;			Z	KOG0516	Dystonin, GAS (Growth-arrest-specific protein), and related proteins
D4AEL2	Golgi membrane protein 1 OS=Rattus norvegicus OX=10116 GN=Golm1 PE=1 SV=2	Golm1	0.5408	0.00255007	Down	44.866	6	2	2	0.677932		0.721378			1.01339	1.29108	1.29623		extracellular				GO:0006996 organelle organization; GO:0006997 nucleus organization; GO:0009987 cellular process; GO:0016043 cellular component organization; GO:0019216 regulation of lipid metabolic process; GO:0019222 regulation of metabolic process; GO:0050789 regulation of biological process; GO:0065007 biological regulation; GO:0071840 cellular component organization or biogenesis; GO:0080090 regulation of pr…	GO:0005622 intracellular; GO:0005623 cell; GO:0005737 cytoplasm; GO:0005794 Golgi apparatus; GO:0012505 endomembrane system; GO:0043226 organelle; GO:0043227 membrane-bounded organelle; GO:0043229 intracellular organelle; GO:0043231 intracellular membrane-bounded organelle;
F1LMK6	L-serine ammonia-lyase OS=Rattus norvegicus OX=10116 GN=Sds PE=1 SV=2	Sds	2.0442	0.00104429	Up	38.276	26.5	6	6	1.21264	1.28925	1.28797	1.16441	1.08631	1.10543	0.665384	0.667778	0.520833	plasma membrane	K17989	SDS; L-serine/L-threonine ammonia-lyase [EC:4.3.1.17 4.3.1.19]	rno01100 Metabolic pathways; rno00270 Cysteine and methionine metabolism; rno00260 Glycine, serine and threonine metabolism; rno01200 Carbon metabolism; rno00290 Valine, leucine and isoleucine biosynthesis; rno01230 Biosynthesis of amino acids	GO:0001101 response to acid chemical; GO:0001505 regulation of neurotransmitter levels; GO:0005975 carbohydrate metabolic process; GO:0005996 monosaccharide metabolic process; GO:0006006 glucose metabolic process; GO:0006082 organic acid metabolic process; GO:0006090 pyruvate metabolic process; GO:0006094 gluconeogenesis; GO:0006520 cellular amino acid metabolic process; GO:0006544 glycine metabo…	GO:0005622 intracellular; GO:0005623 cell; GO:0005737 cytoplasm; GO:0005739 mitochondrion; GO:0005829 cytosol; GO:0043226 organelle; GO:0043227 membrane-bounded organelle; GO:0043229 intracellular organelle; GO:0043231 intracellular membrane-bounded organelle;	GO:0003824 catalytic activity; GO:0003941 L-serine ammonia-lyase activity; GO:0005488 binding; GO:0005515 protein binding; GO:0008144 drug binding; GO:0016829 lyase activity; GO:0016835 carbon-oxygen lyase activity; GO:0016836 hydro-lyase activity; GO:0016840 carbon-nitrogen lyase activity; GO:0016841 ammonia-lyase activity; GO:0019842 vitamin binding; GO:0030170 pyridoxal phosphate binding; GO:0…			E	KOG1250	Threonine/serine dehydratases
F1LQQ8	Beta-glucuronidase OS=Rattus norvegicus OX=10116 GN=Gusb PE=1 SV=2	Gusb	1.5327	0.00120163	Up	74.788	21.8	10	10	1.11762	1.28815	1.20941	0.997542	1.06748	0.961095	0.811891	0.737048	0.80977	extracellular	K01195	uidA; beta-glucuronidase [EC:3.2.1.31]	rno04142 Lysosome; rno01240 Biosynthesis of cofactors; rno01100 Metabolic pathways; rno00053 Ascorbate and aldarate metabolism; rno00040 Pentose and glucuronate interconversions; rno00531 Glycosaminoglycan degradation; rno00860 Porphyrin and chlorophyll metabolism; rno00983 Drug metabolism - other enzymes	GO:0001775 cell activation; GO:0002252 immune effector process; GO:0002263 cell activation involved in immune response; GO:0002274 myeloid leukocyte activation; GO:0002275 myeloid cell activation involved in immune response; GO:0002283 neutrophil activation involved in immune response; GO:0002366 leukocyte activation involved in immune response; GO:0002376 immune system process; GO:0002443 leukoc…	GO:0000323 lytic vacuole; GO:0005576 extracellular region; GO:0005615 extracellular space; GO:0005622 intracellular; GO:0005623 cell; GO:0005737 cytoplasm; GO:0005764 lysosome; GO:0005766 primary lysosome; GO:0005773 vacuole; GO:0005775 vacuolar lumen; GO:0012505 endomembrane system; GO:0030141 secretory granule; GO:0031410 cytoplasmic vesicle; GO:0031974 membrane-enclosed lumen; GO:0031982 vesic…	GO:0003824 catalytic activity; GO:0004553 hydrolase activity, hydrolyzing O-glycosyl compounds; GO:0004566 beta-glucuronidase activity; GO:0005102 signaling receptor binding; GO:0005488 binding; GO:0005515 protein binding; GO:0016787 hydrolase activity; GO:0016798 hydrolase activity, acting on glycosyl bonds; GO:0019904 protein domain specific binding; GO:0030246 carbohydrate binding;	PF02837; PF00703; PF02836	Glycosyl hydrolases family 2, sugar binding domain; Glycosyl hydrolases family 2; Glycosyl hydrolases family 2, TIM barrel domain	G	KOG2024	Beta-Glucuronidase GUSB (glycosylhydrolase superfamily 2)
F1LR92	Serine protease inhibitor A3M OS=Rattus norvegicus OX=10116 GN=Serpina3m PE=1 SV=3	Serpina3m	1.9927	0.000101981	Up	46.84	33.7	12	10	1.2903	1.19583	1.34295	1.02535	1.13689	1.08711	0.670072	0.60698	0.644506	endoplasmic reticulum	K04525			GO:0001775 cell activation; GO:0001894 tissue homeostasis; GO:0002237 response to molecule of bacterial origin; GO:0002252 immune effector process; GO:0002263 cell activation involved in immune response; GO:0002274 myeloid leukocyte activation; GO:0002275 myeloid cell activation involved in immune response; GO:0002283 neutrophil activation involved in immune response; GO:0002366 leukocyte activat…	GO:0000323 lytic vacuole; GO:0005576 extracellular region; GO:0005615 extracellular space; GO:0005622 intracellular; GO:0005623 cell; GO:0005634 nucleus; GO:0005737 cytoplasm; GO:0005764 lysosome; GO:0005766 primary lysosome; GO:0005773 vacuole; GO:0005775 vacuolar lumen; GO:0012505 endomembrane system; GO:0030141 secretory granule; GO:0031091 platelet alpha granule; GO:0031093 platelet alpha gra…	GO:0003676 nucleic acid binding; GO:0003677 DNA binding; GO:0004857 enzyme inhibitor activity; GO:0004866 endopeptidase inhibitor activity; GO:0004867 serine-type endopeptidase inhibitor activity; GO:0004869 cysteine-type endopeptidase inhibitor activity; GO:0005488 binding; GO:0030234 enzyme regulator activity; GO:0030414 peptidase inhibitor activity; GO:0061134 peptidase regulator activity; GO:…	PF00079	Serpin (serine protease inhibitor)	V	KOG2392	Serpin
F1M067	Solute carrier family 26 member 11 OS=Rattus norvegicus OX=10116 GN=Slc26a11 PE=1 SV=2	Slc26a11	0.6595	0.0108434	Down	64.382	10.6	4	4	0.818546	0.737467	0.905059	1.01838	0.951735	0.83683	1.21155	1.41221	1.10823	plasma membrane	K14708			GO:0006810 transport; GO:0006811 ion transport; GO:0006820 anion transport; GO:0006821 chloride transport; GO:0006835 dicarboxylic acid transport; GO:0006873 cellular ion homeostasis; GO:0006885 regulation of pH; GO:0008272 sulfate transport; GO:0009987 cellular process; GO:0015698 inorganic anion transport; GO:0015701 bicarbonate transport; GO:0015711 organic anion transport; GO:0015849 organic …	GO:0000323 lytic vacuole; GO:0005622 intracellular; GO:0005623 cell; GO:0005634 nucleus; GO:0005654 nucleoplasm; GO:0005737 cytoplasm; GO:0005764 lysosome; GO:0005765 lysosomal membrane; GO:0005773 vacuole; GO:0005774 vacuolar membrane; GO:0005783 endoplasmic reticulum; GO:0005794 Golgi apparatus; GO:0005886 plasma membrane; GO:0005887 integral component of plasma membrane; GO:0012505 endomembran…	GO:0005215 transporter activity; GO:0005216 ion channel activity; GO:0005253 anion channel activity; GO:0005254 chloride channel activity; GO:0005310 dicarboxylic acid transmembrane transporter activity; GO:0005342 organic acid transmembrane transporter activity; GO:0008509 anion transmembrane transporter activity; GO:0008514 organic anion transmembrane transporter activity; GO:0015075 ion transm…	PF01740	STAS domain	P	KOG0236	Sulfate/bicarbonate/oxalate exchanger SAT-1 and related transporters (SLC26 family)
F1M2K6	Plakophilin 4 OS=Rattus norvegicus OX=10116 GN=Pkp4 PE=1 SV=2	Pkp4	1.5008	0.00123758	Up	131.46	14.3	13	13	1.16016	1.2707	1.28946	0.920587	0.726213	1.15404	0.812608	0.780379	0.885859	nucleus				GO:0007043 cell-cell junction assembly; GO:0009987 cellular process; GO:0010564 regulation of cell cycle process; GO:0016043 cellular component organization; GO:0022607 cellular component assembly; GO:0032465 regulation of cytokinesis; GO:0032467 positive regulation of cytokinesis; GO:0034329 cell junction assembly; GO:0034330 cell junction organization; GO:0043085 positive regulation of catalyti…	GO:0000922 spindle pole; GO:0005622 intracellular; GO:0005623 cell; GO:0005737 cytoplasm; GO:0005819 spindle; GO:0005856 cytoskeleton; GO:0005886 plasma membrane; GO:0005911 cell-cell junction; GO:0009898 cytoplasmic side of plasma membrane; GO:0014069 postsynaptic density; GO:0015630 microtubule cytoskeleton; GO:0016020 membrane; GO:0030054 cell junction; GO:0030057 desmosome; GO:0030496 midbody…				TW	KOG1048	Neural adherens junction protein Plakophilin and related Armadillo repeat proteins
F1M5V2	GLI pathogenesis-related 2 OS=Rattus norvegicus OX=10116 GN=Glipr2 PE=1 SV=3	Glipr2	1.5722	0.000316607	Up	18.985	40	4	4	1.30011	1.23673	1.16166	1.01228	0.924228	1.01259	0.817101	0.774366	0.760933	cytoplasm				GO:0001932 regulation of protein phosphorylation; GO:0001934 positive regulation of protein phosphorylation; GO:0009893 positive regulation of metabolic process; GO:0009966 regulation of signal transduction; GO:0009967 positive regulation of signal transduction; GO:0010562 positive regulation of phosphorus metabolic process; GO:0010604 positive regulation of macromolecule metabolic process; GO:00…	GO:0000139 Golgi membrane; GO:0005622 intracellular; GO:0005623 cell; GO:0005737 cytoplasm; GO:0005794 Golgi apparatus; GO:0012505 endomembrane system; GO:0016020 membrane; GO:0031090 organelle membrane; GO:0031984 organelle subcompartment; GO:0043226 organelle; GO:0043227 membrane-bounded organelle; GO:0043229 intracellular organelle; GO:0043231 intracellular membrane-bounded organelle; GO:00985…	GO:0005488 binding; GO:0005515 protein binding; GO:0042802 identical protein binding; GO:0042803 protein homodimerization activity; GO:0046983 protein dimerization activity;	PF00188	Cysteine-rich secretory protein family	S	KOG3017	Defense-related protein containing SCP domain
G3V786	Aldo-keto reductase family 1, member B8 OS=Rattus norvegicus OX=10116 GN=Akr1b8 PE=1 SV=1	Akr1b8	2.7758	0.00213959	Up	36.16	51.3	14	2	1.12194	1.70944	1.12915	0.986883	1.5856	1.0402	0.495297	0.450209	0.481294	cytoplasm	K00011	AKR1B; aldehyde reductase [EC:1.1.1.21]	rno01100 Metabolic pathways; rno00561 Glycerolipid metabolism; rno00052 Galactose metabolism; rno00040 Pentose and glucuronate interconversions; rno00051 Fructose and mannose metabolism; rno00790 Folate biosynthesis	GO:0001523 retinoid metabolic process; GO:0006066 alcohol metabolic process; GO:0006629 lipid metabolic process; GO:0006694 steroid biosynthetic process; GO:0006703 estrogen biosynthetic process; GO:0006714 sesquiterpenoid metabolic process; GO:0006720 isoprenoid metabolic process; GO:0006721 terpenoid metabolic process; GO:0006725 cellular aromatic compound metabolic process; GO:0006807 nitrogen…	GO:0005622 intracellular; GO:0005623 cell; GO:0005737 cytoplasm; GO:0005739 mitochondrion; GO:0005759 mitochondrial matrix; GO:0005829 cytosol; GO:0031974 membrane-enclosed lumen; GO:0043226 organelle; GO:0043227 membrane-bounded organelle; GO:0043229 intracellular organelle; GO:0043231 intracellular membrane-bounded organelle; GO:0043233 organelle lumen; GO:0070013 intracellular organelle lumen;	GO:0001758 retinal dehydrogenase activity; GO:0003824 catalytic activity; GO:0004032 alditol:NADP+ 1-oxidoreductase activity; GO:0004033 aldo-keto reductase (NADP) activity; GO:0004303 estradiol 17-beta-dehydrogenase activity; GO:0008106 alcohol dehydrogenase (NADP+) activity; GO:0016229 steroid dehydrogenase activity; GO:0016491 oxidoreductase activity; GO:0016614 oxidoreductase activity, acting…	PF00248	Aldo/keto reductase family	S	KOG1577	Aldo/keto reductase family proteins
P32038	Complement factor D OS=Rattus norvegicus OX=10116 GN=Cfd PE=1 SV=2	Cfd	0.5817	0.000495967	Down	28.442	47.9	7	7	0.805829	0.679899	0.757293	1.05755	0.938279	0.905246	1.29552	1.3181	1.24228	extracellular	K01334	CFD; complement factor D [EC:3.4.21.46]	rno05150 Staphylococcus aureus infection; rno04610 Complement and coagulation cascades; rno05171 Coronavirus disease - COVID-19	GO:0001775 cell activation; GO:0002252 immune effector process; GO:0002253 activation of immune response; GO:0002263 cell activation involved in immune response; GO:0002274 myeloid leukocyte activation; GO:0002275 myeloid cell activation involved in immune response; GO:0002283 neutrophil activation involved in immune response; GO:0002366 leukocyte activation involved in immune response; GO:000237…	GO:0005576 extracellular region; GO:0005615 extracellular space; GO:0005622 intracellular; GO:0005623 cell; GO:0005737 cytoplasm; GO:0012505 endomembrane system; GO:0030141 secretory granule; GO:0031091 platelet alpha granule; GO:0031093 platelet alpha granule lumen; GO:0031410 cytoplasmic vesicle; GO:0031974 membrane-enclosed lumen; GO:0031982 vesicle; GO:0031983 vesicle lumen; GO:0034774 secret…	GO:0003824 catalytic activity; GO:0004175 endopeptidase activity; GO:0004252 serine-type endopeptidase activity; GO:0008233 peptidase activity; GO:0008236 serine-type peptidase activity; GO:0016787 hydrolase activity; GO:0017171 serine hydrolase activity; GO:0070011 peptidase activity, acting on L-amino acid peptides; GO:0140096 catalytic activity, acting on a protein;	PF00089	Trypsin	O	KOG3627	Trypsin
G3V7Q4	Tyrosine-protein phosphatase non-receptor type 12 OS=Rattus norvegicus OX=10116 GN=Ptpn12 PE=1 SV=1	Ptpn12	1.5223	0.000843373	Up	85.983	14.5	7	7	1.1971	1.18421	1.22408	0.913073	1.09133	1.02189	0.855452	0.729997	0.782881	cytoplasm	K18024			GO:0006464 cellular protein modification process; GO:0006470 protein dephosphorylation; GO:0006793 phosphorus metabolic process; GO:0006796 phosphate-containing compound metabolic process; GO:0006807 nitrogen compound metabolic process; GO:0007154 cell communication; GO:0007165 signal transduction; GO:0007166 cell surface receptor signaling pathway; GO:0007167 enzyme linked receptor protein signa…	GO:0002102 podosome; GO:0005622 intracellular; GO:0005623 cell; GO:0005634 nucleus; GO:0005654 nucleoplasm; GO:0005737 cytoplasm; GO:0005829 cytosol; GO:0005856 cytoskeleton; GO:0015629 actin cytoskeleton; GO:0031974 membrane-enclosed lumen; GO:0031981 nuclear lumen; GO:0032991 protein-containing complex; GO:0043226 organelle; GO:0043227 membrane-bounded organelle; GO:0043228 non-membrane-bounded…	GO:0003824 catalytic activity; GO:0004721 phosphoprotein phosphatase activity; GO:0004725 protein tyrosine phosphatase activity; GO:0004726 non-membrane spanning protein tyrosine phosphatase activity; GO:0005488 binding; GO:0005515 protein binding; GO:0016787 hydrolase activity; GO:0016788 hydrolase activity, acting on ester bonds; GO:0016791 phosphatase activity; GO:0017124 SH3 domain binding; G…	PF00102	Protein-tyrosine phosphatase	T	KOG0789	Protein tyrosine phosphatase
G3V9I8	Ammonium transporter Rh type A OS=Rattus norvegicus OX=10116 GN=Rhag PE=1 SV=1	Rhag	0.4953	0.00596185	Down	49.1	6.2	2	2	0.584451	0.760379	0.635522	1.0373	1.21211	1.10469	1.30905		1.35651	plasma membrane	K06580			GO:0002262 myeloid cell homeostasis; GO:0002376 immune system process; GO:0002520 immune system development; GO:0006810 transport; GO:0006811 ion transport; GO:0006812 cation transport; GO:0006820 anion transport; GO:0006855 drug transmembrane transport; GO:0006873 cellular ion homeostasis; GO:0007275 multicellular organism development; GO:0009987 cellular process; GO:0015669 gas transport; GO:00…	GO:0005623 cell; GO:0005886 plasma membrane; GO:0005887 integral component of plasma membrane; GO:0016020 membrane; GO:0016021 integral component of membrane; GO:0031224 intrinsic component of membrane; GO:0031226 intrinsic component of plasma membrane; GO:0071944 cell periphery;	GO:0005215 transporter activity; GO:0005488 binding; GO:0005515 protein binding; GO:0008092 cytoskeletal protein binding; GO:0008324 cation transmembrane transporter activity; GO:0008519 ammonium transmembrane transporter activity; GO:0015075 ion transmembrane transporter activity; GO:0015267 channel activity; GO:0022803 passive transmembrane transporter activity; GO:0022840 leak channel activity…			P	KOG3796	Ammonium transporter RHBG
G3V9X6	DNA repair protein RAD50 OS=Rattus norvegicus OX=10116 GN=Rad50 PE=1 SV=1	Rad50	1.5781	0.0137378	Up	153.84	4.2	4	4	1.12967	1.13801	1.16762	0.706919	1.26552	1.41536	0.749611	0.580664	0.846633	cytoplasm	K10866	RAD50; DNA repair protein RAD50 [EC:3.6.-.-]	rno03450 Non-homologous end-joining; rno03440 Homologous recombination; rno04218 Cellular senescence	GO:0000003 reproduction; GO:0000018 regulation of DNA recombination; GO:0000019 regulation of mitotic recombination; GO:0000280 nuclear division; GO:0000722 telomere maintenance via recombination; GO:0000723 telomere maintenance; GO:0000724 double-strand break repair via homologous recombination; GO:0000725 recombinational repair; GO:0000726 non-recombinational repair; GO:0000729 DNA double-stran…	GO:0000228 nuclear chromosome; GO:0000781 chromosome, telomeric region; GO:0000784 nuclear chromosome, telomeric region; GO:0000785 chromatin; GO:0000790 nuclear chromatin; GO:0000793 condensed chromosome; GO:0000794 condensed nuclear chromosome; GO:0005622 intracellular; GO:0005623 cell; GO:0005634 nucleus; GO:0005654 nucleoplasm; GO:0005694 chromosome; GO:0005737 cytoplasm; GO:0016234 inclusion…	GO:0003676 nucleic acid binding; GO:0003677 DNA binding; GO:0003690 double-stranded DNA binding; GO:0003691 double-stranded telomeric DNA binding; GO:0003697 single-stranded DNA binding; GO:0003824 catalytic activity; GO:0004017 adenylate kinase activity; GO:0005488 binding; GO:0005515 protein binding; GO:0016301 kinase activity; GO:0016740 transferase activity; GO:0016772 transferase activity, t…	PF13476; PF13558	AAA domain; Putative exonuclease SbcCD, C subunit	L	KOG0962	DNA repair protein RAD50, ABC-type ATPase/SMC superfamily
O35274	Neurabin-2 OS=Rattus norvegicus OX=10116 GN=Ppp1r9b PE=1 SV=1	Ppp1r9b	1.6641	0.000966943	Up	89.645	5.5	3	3		1.3919	1.31094	0.958371	0.902508		0.84882	0.808115	0.779353	nucleus	K17551			GO:0000003 reproduction; GO:0001101 response to acid chemical; GO:0001558 regulation of cell growth; GO:0001560 regulation of cell growth by extracellular stimulus; GO:0001932 regulation of protein phosphorylation; GO:0001975 response to amphetamine; GO:0003006 developmental process involved in reproduction; GO:0003008 system process; GO:0006139 nucleobase-containing compound metabolic process; G…	GO:0000164 protein phosphatase type 1 complex; GO:0001726 ruffle; GO:0005622 intracellular; GO:0005623 cell; GO:0005634 nucleus; GO:0005654 nucleoplasm; GO:0005737 cytoplasm; GO:0005856 cytoskeleton; GO:0005886 plasma membrane; GO:0005938 cell cortex; GO:0008287 protein serine/threonine phosphatase complex; GO:0009898 cytoplasmic side of plasma membrane; GO:0014069 postsynaptic density; GO:001562…	GO:0001664 G protein-coupled receptor binding; GO:0003779 actin binding; GO:0003824 catalytic activity; GO:0004672 protein kinase activity; GO:0004857 enzyme inhibitor activity; GO:0004864 protein phosphatase inhibitor activity; GO:0005102 signaling receptor binding; GO:0005488 binding; GO:0005515 protein binding; GO:0008022 protein C-terminus binding; GO:0008092 cytoskeletal protein binding; GO:…	PF00595	PDZ domain (Also known as DHR or GLGF)	Z	KOG1945	Protein phosphatase 1 binding protein spinophilin/neurabin II
P02625	Parvalbumin alpha OS=Rattus norvegicus OX=10116 GN=Pvalb PE=1 SV=2	Pvalb	0.1186	0.00103263	Down	11.925	50	6	5		0.164573	0.247688	0.711885	0.730397	0.931687	1.70387	1.58989	1.92	cytoplasm	K23926			GO:0006873 cellular ion homeostasis; GO:0006874 cellular calcium ion homeostasis; GO:0006875 cellular metal ion homeostasis; GO:0009987 cellular process; GO:0019725 cellular homeostasis; GO:0030003 cellular cation homeostasis; GO:0042592 homeostatic process; GO:0048878 chemical homeostasis; GO:0050801 ion homeostasis; GO:0051480 regulation of cytosolic calcium ion concentration; GO:0055065 metal …	GO:0005622 intracellular; GO:0005623 cell; GO:0005634 nucleus; GO:0005737 cytoplasm; GO:0030424 axon; GO:0032991 protein-containing complex; GO:0036477 somatodendritic compartment; GO:0042995 cell projection; GO:0043005 neuron projection; GO:0043025 neuronal cell body; GO:0043195 terminal bouton; GO:0043226 organelle; GO:0043227 membrane-bounded organelle; GO:0043229 intracellular organelle; GO:0…	GO:0005488 binding; GO:0005509 calcium ion binding; GO:0005515 protein binding; GO:0042802 identical protein binding; GO:0042803 protein homodimerization activity; GO:0043167 ion binding; GO:0043169 cation binding; GO:0046872 metal ion binding; GO:0046982 protein heterodimerization activity; GO:0046983 protein dimerization activity;	PF13499	EF-hand domain pair	T	KOG0027	Calmodulin and related proteins (EF-Hand superfamily)
P02651	Apolipoprotein A-IV OS=Rattus norvegicus OX=10116 GN=Apoa4 PE=1 SV=2	Apoa4	0.3502	1.1468e-05	Down	44.456	47.8	15	15	0.583857	0.54885	0.547679	0.787198	0.864763	0.86981	1.68479	1.60908	1.50398	extracellular	K08760	APOA4; apolipoprotein A-IV	rno04977 Vitamin digestion and absorption; rno04979 Cholesterol metabolism; rno04975 Fat digestion and absorption	GO:0000302 response to reactive oxygen species; GO:0000303 response to superoxide; GO:0000305 response to oxygen radical; GO:0001523 retinoid metabolic process; GO:0002227 innate immune response in mucosa; GO:0002251 organ or tissue specific immune response; GO:0002376 immune system process; GO:0002385 mucosal immune response; GO:0006066 alcohol metabolic process; GO:0006629 lipid metabolic proce…	GO:0005576 extracellular region; GO:0005615 extracellular space; GO:0005622 intracellular; GO:0005623 cell; GO:0005737 cytoplasm; GO:0005768 endosome; GO:0005769 early endosome; GO:0005783 endoplasmic reticulum; GO:0005788 endoplasmic reticulum lumen; GO:0005829 cytosol; GO:0012505 endomembrane system; GO:0031410 cytoplasmic vesicle; GO:0031974 membrane-enclosed lumen; GO:0031982 vesicle; GO:0032…	GO:0005102 signaling receptor binding; GO:0005215 transporter activity; GO:0005319 lipid transporter activity; GO:0005488 binding; GO:0005496 steroid binding; GO:0005507 copper ion binding; GO:0005515 protein binding; GO:0005543 phospholipid binding; GO:0008047 enzyme activator activity; GO:0008289 lipid binding; GO:0015248 sterol transporter activity; GO:0015485 cholesterol binding; GO:0016209 a…	PF01442	Apolipoprotein A1/A4/E domain
P02803	Metallothionein-1 OS=Rattus norvegicus OX=10116 GN=Mt1 PE=1 SV=1	Mt1	0.5054	0.00402753	Down	6.0061	70.5	4	3	0.786967	0.933666	0.70372	0.539619	0.56953	0.669643	1.44348	1.86315	1.49022	extracellular	K14739	MT1_2; metallothionein 1/2	rno04978 Mineral absorption				PF00131	Metallothionein
P04638	Apolipoprotein A-II OS=Rattus norvegicus OX=10116 GN=Apoa2 PE=2 SV=1	Apoa2	0.4313	0.000107036	Down	11.439	17.6	2	2	0.655733	0.649588	0.588731		0.851143	0.863296	1.49456	1.55203	1.34492	extracellular	K08758	APOA2; apolipoprotein A-II	rno04979 Cholesterol metabolism; rno03320 PPAR signaling pathway	GO:0001523 retinoid metabolic process; GO:0001817 regulation of cytokine production; GO:0001818 negative regulation of cytokine production; GO:0001819 positive regulation of cytokine production; GO:0002526 acute inflammatory response; GO:0002682 regulation of immune system process; GO:0002683 negative regulation of immune system process; GO:0002697 regulation of immune effector process; GO:000269…	GO:0005576 extracellular region; GO:0005615 extracellular space; GO:0005622 intracellular; GO:0005623 cell; GO:0005737 cytoplasm; GO:0005768 endosome; GO:0005769 early endosome; GO:0005783 endoplasmic reticulum; GO:0005788 endoplasmic reticulum lumen; GO:0005829 cytosol; GO:0012505 endomembrane system; GO:0031410 cytoplasmic vesicle; GO:0031974 membrane-enclosed lumen; GO:0031982 vesicle; GO:0032…	GO:0004857 enzyme inhibitor activity; GO:0005102 signaling receptor binding; GO:0005215 transporter activity; GO:0005319 lipid transporter activity; GO:0005488 binding; GO:0005496 steroid binding; GO:0005515 protein binding; GO:0005543 phospholipid binding; GO:0008035 high-density lipoprotein particle binding; GO:0008047 enzyme activator activity; GO:0008289 lipid binding; GO:0015248 sterol trans…
P05544	Serine protease inhibitor A3L OS=Rattus norvegicus OX=10116 GN=Serpina3l PE=1 SV=3	Serpina3l	0.6501	3.46e-05	Down	46.277	47.9	19	3	0.828555	0.797383	0.806012	0.974859	0.886664	0.965407	1.28951	1.2379	1.21371	plasma membrane				GO:0001775 cell activation; GO:0001894 tissue homeostasis; GO:0002237 response to molecule of bacterial origin; GO:0002252 immune effector process; GO:0002263 cell activation involved in immune response; GO:0002274 myeloid leukocyte activation; GO:0002275 myeloid cell activation involved in immune response; GO:0002283 neutrophil activation involved in immune response; GO:0002366 leukocyte activat…	GO:0000323 lytic vacuole; GO:0005576 extracellular region; GO:0005615 extracellular space; GO:0005622 intracellular; GO:0005623 cell; GO:0005634 nucleus; GO:0005737 cytoplasm; GO:0005764 lysosome; GO:0005766 primary lysosome; GO:0005773 vacuole; GO:0005775 vacuolar lumen; GO:0012505 endomembrane system; GO:0030141 secretory granule; GO:0031091 platelet alpha granule; GO:0031093 platelet alpha gra…	GO:0003676 nucleic acid binding; GO:0003677 DNA binding; GO:0004857 enzyme inhibitor activity; GO:0004866 endopeptidase inhibitor activity; GO:0004867 serine-type endopeptidase inhibitor activity; GO:0004869 cysteine-type endopeptidase inhibitor activity; GO:0005488 binding; GO:0030234 enzyme regulator activity; GO:0030414 peptidase inhibitor activity; GO:0061134 peptidase regulator activity; GO:…	PF00079	Serpin (serine protease inhibitor)	V	KOG2392	Serpin
P05545	Serine protease inhibitor A3K OS=Rattus norvegicus OX=10116 GN=Serpina3k PE=1 SV=3	Serpina3k	0.5861	0.000106362	Down	46.561	41.1	16	4	0.787025	0.755446	0.740011	0.949353	0.883858	0.990194	1.35593	1.31265	1.22553	plasma membrane	K04525			GO:0001775 cell activation; GO:0001894 tissue homeostasis; GO:0002237 response to molecule of bacterial origin; GO:0002252 immune effector process; GO:0002263 cell activation involved in immune response; GO:0002274 myeloid leukocyte activation; GO:0002275 myeloid cell activation involved in immune response; GO:0002283 neutrophil activation involved in immune response; GO:0002366 leukocyte activat…	GO:0000323 lytic vacuole; GO:0005576 extracellular region; GO:0005615 extracellular space; GO:0005622 intracellular; GO:0005623 cell; GO:0005634 nucleus; GO:0005737 cytoplasm; GO:0005764 lysosome; GO:0005766 primary lysosome; GO:0005773 vacuole; GO:0005775 vacuolar lumen; GO:0012505 endomembrane system; GO:0030141 secretory granule; GO:0031091 platelet alpha granule; GO:0031093 platelet alpha gra…	GO:0003676 nucleic acid binding; GO:0003677 DNA binding; GO:0004857 enzyme inhibitor activity; GO:0004866 endopeptidase inhibitor activity; GO:0004867 serine-type endopeptidase inhibitor activity; GO:0004869 cysteine-type endopeptidase inhibitor activity; GO:0005488 binding; GO:0030234 enzyme regulator activity; GO:0030414 peptidase inhibitor activity; GO:0061134 peptidase regulator activity; GO:…	PF00079	Serpin (serine protease inhibitor)	V	KOG2392	Serpin
P05942	Protein S100-A4 OS=Rattus norvegicus OX=10116 GN=S100a4 PE=2 SV=1	S100a4	2.0604	0.000313455	Up	11.776	52.5	7	7	1.40165	1.16292	1.30743	1.07716	1.05659	1.11496	0.642313	0.647044	0.589924	extracellular	K23761			GO:0001837 epithelial to mesenchymal transition; GO:0007275 multicellular organism development; GO:0009888 tissue development; GO:0009966 regulation of signal transduction; GO:0009967 positive regulation of signal transduction; GO:0009987 cellular process; GO:0010646 regulation of cell communication; GO:0010647 positive regulation of cell communication; GO:0023051 regulation of signaling; GO:0023…	GO:0005622 intracellular; GO:0005623 cell; GO:0005634 nucleus; GO:0005737 cytoplasm; GO:0042995 cell projection; GO:0043005 neuron projection; GO:0043226 organelle; GO:0043227 membrane-bounded organelle; GO:0043229 intracellular organelle; GO:0043231 intracellular membrane-bounded organelle; GO:0048471 perinuclear region of cytoplasm; GO:0120025 plasma membrane bounded cell projection;	GO:0003779 actin binding; GO:0005102 signaling receptor binding; GO:0005488 binding; GO:0005509 calcium ion binding; GO:0005515 protein binding; GO:0008092 cytoskeletal protein binding; GO:0042802 identical protein binding; GO:0042803 protein homodimerization activity; GO:0043167 ion binding; GO:0043169 cation binding; GO:0046872 metal ion binding; GO:0046982 protein heterodimerization activity; …	PF01023	S-100/ICaBP type calcium binding domain
P05964	Protein S100-A6 OS=Rattus norvegicus OX=10116 GN=S100a6 PE=1 SV=3	S100a6	1.5629	0.000430169	Up	10.035	16.9	2	2	1.20221	1.11634	1.27019	0.966401	1.04353	1.10518	0.793393	0.752619	0.750136	cytoplasm	K23764			GO:0000902 cell morphogenesis; GO:0000904 cell morphogenesis involved in differentiation; GO:0006810 transport; GO:0006811 ion transport; GO:0007154 cell communication; GO:0007165 signal transduction; GO:0007275 multicellular organism development; GO:0007399 nervous system development; GO:0007409 axonogenesis; GO:0008284 positive regulation of cell population proliferation; GO:0009653 anatomical …	GO:0001726 ruffle; GO:0005622 intracellular; GO:0005623 cell; GO:0005634 nucleus; GO:0005635 nuclear envelope; GO:0005737 cytoplasm; GO:0005829 cytosol; GO:0005886 plasma membrane; GO:0009898 cytoplasmic side of plasma membrane; GO:0012505 endomembrane system; GO:0016020 membrane; GO:0019897 extrinsic component of plasma membrane; GO:0019898 extrinsic component of membrane; GO:0031234 extrinsic c…	GO:0005215 transporter activity; GO:0005488 binding; GO:0005509 calcium ion binding; GO:0005515 protein binding; GO:0005523 tropomyosin binding; GO:0008092 cytoskeletal protein binding; GO:0008270 zinc ion binding; GO:0015075 ion transmembrane transporter activity; GO:0022857 transmembrane transporter activity; GO:0042802 identical protein binding; GO:0042803 protein homodimerization activity; GO…	PF01023	S-100/ICaBP type calcium binding domain
P06238	Alpha-2-macroglobulin OS=Rattus norvegicus OX=10116 GN=A2m PE=2 SV=2	A2m	3.525	3.22192e-07	Up	163.78	46	52	49	1.27232	1.2322	1.2079	1.38518	1.42796	1.42126	0.358328	0.343993	0.350854	extracellular	K03910	A2M; alpha-2-macroglobulin	rno04610 Complement and coagulation cascades	GO:0000003 reproduction; GO:0001101 response to acid chemical; GO:0001553 luteinization; GO:0001868 regulation of complement activation, lectin pathway; GO:0001869 negative regulation of complement activation, lectin pathway; GO:0002376 immune system process; GO:0002437 inflammatory response to antigenic stimulus; GO:0002438 acute inflammatory response to antigenic stimulus; GO:0002526 acute infl…	GO:0005576 extracellular region; GO:0005615 extracellular space; GO:0005622 intracellular; GO:0005623 cell; GO:0005737 cytoplasm; GO:0005829 cytosol; GO:0012505 endomembrane system; GO:0030141 secretory granule; GO:0031091 platelet alpha granule; GO:0031093 platelet alpha granule lumen; GO:0031410 cytoplasmic vesicle; GO:0031974 membrane-enclosed lumen; GO:0031982 vesicle; GO:0031983 vesicle lume…	GO:0002020 protease binding; GO:0004857 enzyme inhibitor activity; GO:0004866 endopeptidase inhibitor activity; GO:0004867 serine-type endopeptidase inhibitor activity; GO:0005096 GTPase activator activity; GO:0005102 signaling receptor binding; GO:0005488 binding; GO:0005515 protein binding; GO:0008047 enzyme activator activity; GO:0019838 growth factor binding; GO:0019899 enzyme binding; GO:001…	PF01835; PF07703; PF07678; PF07677	MG2 domain; Alpha-2-macroglobulin family N-terminal region; A-macroglobulin complement component; A-macroglobulin receptor	O	KOG1366	Alpha-macroglobulin
P06762	Heme oxygenase 1 OS=Rattus norvegicus OX=10116 GN=Hmox1 PE=1 SV=1	Hmox1	0.3382	0.000627629	Down	33.005	55.7	9	9	0.783188	0.561322	0.595237	0.427169	0.443373	0.454431	2.01699	1.97651	1.74178	peroxisome	K00510	HMOX1; heme oxygenase 1 [EC:1.14.14.18]	rno05200 Pathways in cancer; rno01100 Metabolic pathways; rno04978 Mineral absorption; rno05418 Fluid shear stress and atherosclerosis; rno05225 Hepatocellular carcinoma; rno00860 Porphyrin and chlorophyll metabolism; rno05206 MicroRNAs in cancer; rno04216 Ferroptosis; rno04066 HIF-1 signaling pathway	GO:0000302 response to reactive oxygen species; GO:0001525 angiogenesis; GO:0001568 blood vessel development; GO:0001666 response to hypoxia; GO:0001817 regulation of cytokine production; GO:0001818 negative regulation of cytokine production; GO:0001889 liver development; GO:0001936 regulation of endothelial cell proliferation; GO:0001938 positive regulation of endothelial cell proliferation; GO:…	GO:0005622 intracellular; GO:0005623 cell; GO:0005634 nucleus; GO:0005730 nucleolus; GO:0005737 cytoplasm; GO:0005783 endoplasmic reticulum; GO:0005829 cytosol; GO:0005886 plasma membrane; GO:0005901 caveola; GO:0012505 endomembrane system; GO:0016020 membrane; GO:0031974 membrane-enclosed lumen; GO:0031981 nuclear lumen; GO:0043226 organelle; GO:0043227 membrane-bounded organelle; GO:0043228 non…	GO:0003824 catalytic activity; GO:0004392 heme oxygenase (decyclizing) activity; GO:0004620 phospholipase activity; GO:0004630 phospholipase D activity; GO:0005488 binding; GO:0005515 protein binding; GO:0008081 phosphoric diester hydrolase activity; GO:0016298 lipase activity; GO:0016491 oxidoreductase activity; GO:0016705 oxidoreductase activity, acting on paired donors, with incorporation or r…	PF01126	Heme oxygenase	P	KOG4480	Heme oxygenase
P07943	Aldo-keto reductase family 1 member B1 OS=Rattus norvegicus OX=10116 GN=Akr1b1 PE=1 SV=3	Akr1b1	2.1393	4.35843e-05	Up	35.797	64.2	22	20	1.42978	1.25782	1.37552	0.992008	1.0235	1.02206	0.620387	0.645103	0.633828	cytoplasm	K00011	AKR1B; aldehyde reductase [EC:1.1.1.21]	rno01100 Metabolic pathways; rno00561 Glycerolipid metabolism; rno00052 Galactose metabolism; rno00040 Pentose and glucuronate interconversions; rno00051 Fructose and mannose metabolism; rno00790 Folate biosynthesis	GO:0000003 reproduction; GO:0000302 response to reactive oxygen species; GO:0001101 response to acid chemical; GO:0001655 urogenital system development; GO:0001822 kidney development; GO:0001894 tissue homeostasis; GO:0003008 system process; GO:0003014 renal system process; GO:0003091 renal water homeostasis; GO:0005975 carbohydrate metabolic process; GO:0005996 monosaccharide metabolic process; …	GO:0000323 lytic vacuole; GO:0005576 extracellular region; GO:0005615 extracellular space; GO:0005622 intracellular; GO:0005623 cell; GO:0005634 nucleus; GO:0005654 nucleoplasm; GO:0005737 cytoplasm; GO:0005764 lysosome; GO:0005773 vacuole; GO:0005829 cytosol; GO:0005902 microvillus; GO:0005911 cell-cell junction; GO:0030054 cell junction; GO:0031974 membrane-enclosed lumen; GO:0031981 nuclear lu…	GO:0003824 catalytic activity; GO:0004032 alditol:NADP+ 1-oxidoreductase activity; GO:0004033 aldo-keto reductase (NADP) activity; GO:0008106 alcohol dehydrogenase (NADP+) activity; GO:0009055 electron transfer activity; GO:0016491 oxidoreductase activity; GO:0016614 oxidoreductase activity, acting on CH-OH group of donors; GO:0016616 oxidoreductase activity, acting on the CH-OH group of donors, …	PF00248	Aldo/keto reductase family	S	KOG1577	Aldo/keto reductase family proteins
P08649	Complement C4 OS=Rattus norvegicus OX=10116 GN=C4 PE=1 SV=3	C4	0.6264	7.85743e-06	Down	192.16	29.1	36	10	0.780969	0.809707	0.791496	0.902566	0.984057	0.928342	1.26415	1.2435	1.29521	plasma membrane	K03989	C4; complement component 4	rno05150 Staphylococcus aureus infection; rno05133 Pertussis; rno04610 Complement and coagulation cascades; rno05322 Systemic lupus erythematosus; rno05171 Coronavirus disease - COVID-19	GO:0002237 response to molecule of bacterial origin; GO:0002250 adaptive immune response; GO:0002252 immune effector process; GO:0002253 activation of immune response; GO:0002376 immune system process; GO:0002443 leukocyte mediated immunity; GO:0002449 lymphocyte mediated immunity; GO:0002460 adaptive immune response based on somatic recombination of immune receptors built from immunoglobulin sup…	GO:0005576 extracellular region; GO:0005615 extracellular space; GO:0005622 intracellular; GO:0005623 cell; GO:0005737 cytoplasm; GO:0005783 endoplasmic reticulum; GO:0005788 endoplasmic reticulum lumen; GO:0005886 plasma membrane; GO:0012505 endomembrane system; GO:0016020 membrane; GO:0030424 axon; GO:0030425 dendrite; GO:0031974 membrane-enclosed lumen; GO:0036477 somatodendritic compartment; …	GO:0001846 opsonin binding; GO:0001848 complement binding; GO:0001849 complement component C1q complex binding; GO:0003824 catalytic activity; GO:0004175 endopeptidase activity; GO:0004252 serine-type endopeptidase activity; GO:0005488 binding; GO:0005515 protein binding; GO:0008233 peptidase activity; GO:0008236 serine-type peptidase activity; GO:0016787 hydrolase activity; GO:0017171 serine hyd…	PF01835; PF07703; PF01821; PF07678; PF07677; PF01759	MG2 domain; Alpha-2-macroglobulin family N-terminal region; Anaphylotoxin-like domain; A-macroglobulin complement component; A-macroglobulin receptor; UNC-6/NTR/C345C module	O	KOG1366	Alpha-macroglobulin
P0DSP1	Sortilin-related receptor OS=Rattus norvegicus OX=10116 GN=Sorl1 PE=1 SV=1	Sorl1	1.5391	0.0355501	Up	247.31	5.3	8	8	1.24441	1.2944	1.25054	0.995315	0.866657	0.886658	0.609377	0.864855	0.987783	extracellular,plasma membrane	K24498			GO:0001932 regulation of protein phosphorylation; GO:0001933 negative regulation of protein phosphorylation; GO:0006469 negative regulation of protein kinase activity; GO:0006605 protein targeting; GO:0006622 protein targeting to lysosome; GO:0006623 protein targeting to vacuole; GO:0006807 nitrogen compound metabolic process; GO:0006810 transport; GO:0006886 intracellular protein transport; GO:0…	GO:0000139 Golgi membrane; GO:0005576 extracellular region; GO:0005615 extracellular space; GO:0005622 intracellular; GO:0005623 cell; GO:0005634 nucleus; GO:0005635 nuclear envelope; GO:0005641 nuclear envelope lumen; GO:0005737 cytoplasm; GO:0005768 endosome; GO:0005769 early endosome; GO:0005770 late endosome; GO:0005771 multivesicular body; GO:0005783 endoplasmic reticulum; GO:0005794 Golgi a…	GO:0001540 amyloid-beta binding; GO:0004888 transmembrane signaling receptor activity; GO:0005041 low-density lipoprotein particle receptor activity; GO:0005488 binding; GO:0005515 protein binding; GO:0019899 enzyme binding; GO:0030169 low-density lipoprotein particle binding; GO:0030228 lipoprotein particle receptor activity; GO:0030306 ADP-ribosylation factor binding; GO:0031267 small GTPase bi…	PF00041	Fibronectin type III domain	T	KOG3511	Sortilin and related receptors
P14141	Carbonic anhydrase 3 OS=Rattus norvegicus OX=10116 GN=Ca3 PE=1 SV=3	Ca3	0.5497	0.00117779	Down	29.431	54.2	9	9	0.655164	0.663117	0.79556	1.0396	0.948635	1.05236	1.35105	1.30177	1.19275	cytoplasm	K01672	CA; carbonic anhydrase [EC:4.2.1.1]	rno01100 Metabolic pathways; rno00910 Nitrogen metabolism	GO:0006793 phosphorus metabolic process; GO:0006796 phosphate-containing compound metabolic process; GO:0006810 transport; GO:0006811 ion transport; GO:0006820 anion transport; GO:0006950 response to stress; GO:0006979 response to oxidative stress; GO:0008152 metabolic process; GO:0009605 response to external stimulus; GO:0009607 response to biotic stimulus; GO:0009617 response to bacterium; GO:0…	GO:0005622 intracellular; GO:0005623 cell; GO:0005737 cytoplasm; GO:0005829 cytosol;	GO:0003824 catalytic activity; GO:0004089 carbonate dehydratase activity; GO:0005488 binding; GO:0016151 nickel cation binding; GO:0016787 hydrolase activity; GO:0016788 hydrolase activity, acting on ester bonds; GO:0016791 phosphatase activity; GO:0016829 lyase activity; GO:0016835 carbon-oxygen lyase activity; GO:0016836 hydro-lyase activity; GO:0042578 phosphoric ester hydrolase activity; GO:0…	PF00194	Eukaryotic-type carbonic anhydrase	P	KOG0382	Carbonic anhydrase
P14740	Dipeptidyl peptidase 4 OS=Rattus norvegicus OX=10116 GN=Dpp4 PE=1 SV=2	Dpp4	0.2053	2.82793e-05	Down	88.087	40.8	37	2	0.331921	0.368197	0.321672				1.69437	1.47069	1.81314	extracellular	K01278	DPP4; dipeptidyl-peptidase 4 [EC:3.4.14.5]	rno04974 Protein digestion and absorption	GO:0001662 behavioral fear response; GO:0001666 response to hypoxia; GO:0001667 ameboidal-type cell migration; GO:0001775 cell activation; GO:0002209 behavioral defense response; GO:0002376 immune system process; GO:0002682 regulation of immune system process; GO:0002684 positive regulation of immune system process; GO:0002694 regulation of leukocyte activation; GO:0002696 positive regulation of …	GO:0005576 extracellular region; GO:0005622 intracellular; GO:0005623 cell; GO:0005737 cytoplasm; GO:0005783 endoplasmic reticulum; GO:0005794 Golgi apparatus; GO:0005886 plasma membrane; GO:0005911 cell-cell junction; GO:0009986 cell surface; GO:0012505 endomembrane system; GO:0016020 membrane; GO:0016324 apical plasma membrane; GO:0030027 lamellipodium; GO:0030054 cell junction; GO:0030139 endo…	GO:0001618 virus receptor activity; GO:0002020 protease binding; GO:0003824 catalytic activity; GO:0004175 endopeptidase activity; GO:0004177 aminopeptidase activity; GO:0004252 serine-type endopeptidase activity; GO:0005102 signaling receptor binding; GO:0005488 binding; GO:0005515 protein binding; GO:0005518 collagen binding; GO:0008233 peptidase activity; GO:0008236 serine-type peptidase activ…	PF00326	Prolyl oligopeptidase family	T	KOG2100	Dipeptidyl aminopeptidase
P19103	Protein phosphatase 1 regulatory subunit 1A OS=Rattus norvegicus OX=10116 GN=Ppp1r1a PE=1 SV=1	Ppp1r1a	1.8825	0.0212844	Up	18.738	34.5	3	3	1.30528	1.48184	1.5072	0.497381	0.928345	0.998779	0.837502	0.524703	0.918975	nucleus	K08050	PPP1R1A; protein phosphatase 1 regulatory subunit 1A	rno04261 Adrenergic signaling in cardiomyocytes; rno04720 Long-term potentiation	GO:0001932 regulation of protein phosphorylation; GO:0001933 negative regulation of protein phosphorylation; GO:0006469 negative regulation of protein kinase activity; GO:0007154 cell communication; GO:0007165 signal transduction; GO:0009892 negative regulation of metabolic process; GO:0009987 cellular process; GO:0010563 negative regulation of phosphorus metabolic process; GO:0010605 negative re…	GO:0005576 extracellular region; GO:0005615 extracellular space; GO:0005622 intracellular; GO:0005623 cell; GO:0005737 cytoplasm; GO:0030016 myofibril; GO:0043226 organelle; GO:0043228 non-membrane-bounded organelle; GO:0043229 intracellular organelle; GO:0043232 intracellular non-membrane-bounded organelle; GO:0043292 contractile fiber; GO:0098723 skeletal muscle myofibril; GO:0099080 supramolec…	GO:0004857 enzyme inhibitor activity; GO:0004864 protein phosphatase inhibitor activity; GO:0004865 protein serine/threonine phosphatase inhibitor activity; GO:0019208 phosphatase regulator activity; GO:0019212 phosphatase inhibitor activity; GO:0019888 protein phosphatase regulator activity; GO:0030234 enzyme regulator activity; GO:0098772 molecular function regulator;
P20760	Ig gamma-2A chain C region OS=Rattus norvegicus OX=10116 GN=Igg-2a PE=1 SV=1	Igg-2a	0.626	1.99439e-05	Down	35.185	42.2	9	8	0.726297	0.692447	0.723683	1.08575	1.22008	1.12925	1.12987	1.17019	1.12243	nucleus				GO:0002250 adaptive immune response; GO:0002252 immune effector process; GO:0002253 activation of immune response; GO:0002376 immune system process; GO:0002429 immune response-activating cell surface receptor signaling pathway; GO:0002443 leukocyte mediated immunity; GO:0002449 lymphocyte mediated immunity; GO:0002455 humoral immune response mediated by circulating immunoglobulin; GO:0002460 adap…	GO:0005576 extracellular region; GO:0005615 extracellular space; GO:0005623 cell; GO:0005886 plasma membrane; GO:0009897 external side of plasma membrane; GO:0009986 cell surface; GO:0016020 membrane; GO:0019814 immunoglobulin complex; GO:0032991 protein-containing complex; GO:0042571 immunoglobulin complex, circulating; GO:0071944 cell periphery; GO:0072562 blood microparticle; GO:0098552 side o…	GO:0003823 antigen binding; GO:0005102 signaling receptor binding; GO:0005488 binding; GO:0005515 protein binding; GO:0034987 immunoglobulin receptor binding;	PF07654	Immunoglobulin C1-set domain
P30152	Neutrophil gelatinase-associated lipocalin OS=Rattus norvegicus OX=10116 GN=Lcn2 PE=1 SV=2	Lcn2	5.2463	1.94277e-06	Up	22.475	19.2	3	3	1.4183	1.26164	1.28681	1.43959	1.57009	1.26747	0.260155	0.248132	0.247812	extracellular	K21129	LCN2; lipocalin 2	rno04657 IL-17 signaling pathway	GO:0000302 response to reactive oxygen species; GO:0001775 cell activation; GO:0002237 response to molecule of bacterial origin; GO:0002252 immune effector process; GO:0002263 cell activation involved in immune response; GO:0002274 myeloid leukocyte activation; GO:0002275 myeloid cell activation involved in immune response; GO:0002283 neutrophil activation involved in immune response; GO:0002366 …	GO:0005576 extracellular region; GO:0005615 extracellular space; GO:0005622 intracellular; GO:0005623 cell; GO:0005737 cytoplasm; GO:0005829 cytosol; GO:0012505 endomembrane system; GO:0030141 secretory granule; GO:0031410 cytoplasmic vesicle; GO:0031974 membrane-enclosed lumen; GO:0031982 vesicle; GO:0031983 vesicle lumen; GO:0034774 secretory granule lumen; GO:0035580 specific granule lumen; GO…	GO:0002020 protease binding; GO:0005488 binding; GO:0005506 iron ion binding; GO:0005515 protein binding; GO:0019899 enzyme binding; GO:0042802 identical protein binding; GO:0042803 protein homodimerization activity; GO:0043167 ion binding; GO:0043169 cation binding; GO:0046872 metal ion binding; GO:0046914 transition metal ion binding; GO:0046983 protein dimerization activity;	PF00061	Lipocalin / cytosolic fatty-acid binding protein family
P45479	Palmitoyl-protein thioesterase 1 OS=Rattus norvegicus OX=10116 GN=Ppt1 PE=1 SV=1	Ppt1	1.5381	0.00914094	Up	34.455	24.2	4	4	1.22569	1.19877	1.08223	0.836554	1.27794	1.099	0.82741	0.63828	0.814123	extracellular	K01074	PPT; palmitoyl-protein thioesterase [EC:3.1.2.22]	rno04142 Lysosome; rno01100 Metabolic pathways; rno00062 Fatty acid elongation; rno01212 Fatty acid metabolism	GO:0001505 regulation of neurotransmitter levels; GO:0001558 regulation of cell growth; GO:0002084 protein depalmitoylation; GO:0003008 system process; GO:0006139 nucleobase-containing compound metabolic process; GO:0006163 purine nucleotide metabolic process; GO:0006164 purine nucleotide biosynthetic process; GO:0006464 cellular protein modification process; GO:0006629 lipid metabolic process; G…	GO:0000323 lytic vacuole; GO:0005576 extracellular region; GO:0005615 extracellular space; GO:0005622 intracellular; GO:0005623 cell; GO:0005634 nucleus; GO:0005737 cytoplasm; GO:0005764 lysosome; GO:0005773 vacuole; GO:0005775 vacuolar lumen; GO:0005794 Golgi apparatus; GO:0005829 cytosol; GO:0008021 synaptic vesicle; GO:0012505 endomembrane system; GO:0016020 membrane; GO:0030133 transport vesi…	GO:0003824 catalytic activity; GO:0008474 palmitoyl-(protein) hydrolase activity; GO:0016289 CoA hydrolase activity; GO:0016290 palmitoyl-CoA hydrolase activity; GO:0016787 hydrolase activity; GO:0016788 hydrolase activity, acting on ester bonds; GO:0016790 thiolester hydrolase activity; GO:0047617 acyl-CoA hydrolase activity; GO:0098599 palmitoyl hydrolase activity; GO:0140096 catalytic activity…	PF02089	Palmitoyl protein thioesterase	IO	KOG2541	Palmitoyl protein thioesterase
P47967	Galectin-5 OS=Rattus norvegicus OX=10116 GN=Lgals5 PE=1 SV=2	Lgals5	0.4228	0.000321776	Down	16.196	50.3	6	2	0.574801	0.583535	0.464925	1.16874	1.21806	1.15086	1.27405	1.31697	1.24805	cytoplasm,nucleus	K17522			GO:0000003 reproduction; GO:0000165 MAPK cascade; GO:0001817 regulation of cytokine production; GO:0001818 negative regulation of cytokine production; GO:0001819 positive regulation of cytokine production; GO:0001910 regulation of leukocyte mediated cytotoxicity; GO:0001911 negative regulation of leukocyte mediated cytotoxicity; GO:0001932 regulation of protein phosphorylation; GO:0001934 positiv…	GO:0005576 extracellular region; GO:0005615 extracellular space; GO:0005622 intracellular; GO:0005623 cell; GO:0005634 nucleus; GO:0005737 cytoplasm; GO:0005829 cytosol; GO:0043226 organelle; GO:0043227 membrane-bounded organelle; GO:0043229 intracellular organelle; GO:0043231 intracellular membrane-bounded organelle;	GO:0005102 signaling receptor binding; GO:0005488 binding; GO:0005515 protein binding; GO:0005534 galactose binding; GO:0008047 enzyme activator activity; GO:0016936 galactoside binding; GO:0019207 kinase regulator activity; GO:0019209 kinase activator activity; GO:0019887 protein kinase regulator activity; GO:0019899 enzyme binding; GO:0030234 enzyme regulator activity; GO:0030246 carbohydrate b…	PF00337	Galactoside-binding lectin	W	KOG3587	Galectin, galactose-binding lectin
P55159	Serum paraoxonase/arylesterase 1 OS=Rattus norvegicus OX=10116 GN=Pon1 PE=1 SV=3	Pon1	0.6345	0.00814111	Down	39.358	12.7	4	4	0.805999	0.884591	0.649313	0.937508	1.03568	0.999397	1.28762	1.18915	1.21074	extracellular	K01045			GO:0001101 response to acid chemical; GO:0003008 system process; GO:0003013 circulatory system process; GO:0006066 alcohol metabolic process; GO:0006082 organic acid metabolic process; GO:0006629 lipid metabolic process; GO:0006644 phospholipid metabolic process; GO:0006650 glycerophospholipid metabolic process; GO:0006725 cellular aromatic compound metabolic process; GO:0006793 phosphorus metabo…	GO:0005576 extracellular region; GO:0005615 extracellular space; GO:0005622 intracellular; GO:0005623 cell; GO:0032991 protein-containing complex; GO:0032994 protein-lipid complex; GO:0034358 plasma lipoprotein particle; GO:0034364 high-density lipoprotein particle; GO:0034366 spherical high-density lipoprotein particle; GO:0043226 organelle; GO:0043227 membrane-bounded organelle; GO:0043229 intr…	GO:0003824 catalytic activity; GO:0004063 aryldialkylphosphatase activity; GO:0004064 arylesterase activity; GO:0005488 binding; GO:0005509 calcium ion binding; GO:0005515 protein binding; GO:0005543 phospholipid binding; GO:0008035 high-density lipoprotein particle binding; GO:0008289 lipid binding; GO:0016787 hydrolase activity; GO:0016788 hydrolase activity, acting on ester bonds; GO:0016791 p…
Q02759	Polyunsaturated fatty acid lipoxygenase ALOX15 OS=Rattus norvegicus OX=10116 GN=Alox15 PE=1 SV=3	Alox15	0.6073	2.87651e-05	Down	75.377	21.4	9	9	0.808	0.764133	0.774415	0.924462	0.943218	0.92175	1.30215	1.24698	1.31489	cytoplasm	K00460	ALOX15; arachidonate 15-lipoxygenase [EC:1.13.11.33]	rno04216 Ferroptosis; rno01100 Metabolic pathways; rno00591 Linoleic acid metabolism; rno00590 Arachidonic acid metabolism; rno04217 Necroptosis; rno04726 Serotonergic synapse	GO:0001503 ossification; GO:0001676 long-chain fatty acid metabolic process; GO:0001932 regulation of protein phosphorylation; GO:0001934 positive regulation of protein phosphorylation; GO:0002682 regulation of immune system process; GO:0002683 negative regulation of immune system process; GO:0002819 regulation of adaptive immune response; GO:0002820 negative regulation of adaptive immune respons…	GO:0005622 intracellular; GO:0005623 cell; GO:0005737 cytoplasm; GO:0005811 lipid droplet; GO:0005829 cytosol; GO:0005886 plasma membrane; GO:0009898 cytoplasmic side of plasma membrane; GO:0016020 membrane; GO:0019897 extrinsic component of plasma membrane; GO:0019898 extrinsic component of membrane; GO:0031234 extrinsic component of cytoplasmic side of plasma membrane; GO:0042383 sarcolemma; GO…	GO:0003824 catalytic activity; GO:0004052 arachidonate 12(S)-lipoxygenase activity; GO:0005488 binding; GO:0005506 iron ion binding; GO:0005543 phospholipid binding; GO:0005546 phosphatidylinositol-4,5-bisphosphate binding; GO:0008200 ion channel inhibitor activity; GO:0008289 lipid binding; GO:0015459 potassium channel regulator activity; GO:0016247 channel regulator activity; GO:0016248 channel…	PF01477; PF00305	PLAT/LH2 domain; Lipoxygenase
Q66HN9	Chloride channel protein OS=Rattus norvegicus OX=10116 GN=Clcnka PE=2 SV=1	Clcnka	1.8213	0.000556139	Up	75.515	12.4	7	4	1.13611	1.33636	1.1886	0.989451	1.1927	1.14665	0.714637	0.661178	0.634306	plasma membrane	K05017			GO:0001101 response to acid chemical; GO:0001655 urogenital system development; GO:0001822 kidney development; GO:0003008 system process; GO:0006810 transport; GO:0006811 ion transport; GO:0006820 anion transport; GO:0006821 chloride transport; GO:0006950 response to stress; GO:0007275 multicellular organism development; GO:0007588 excretion; GO:0007589 body fluid secretion; GO:0009268 response t…	GO:0005622 intracellular; GO:0005623 cell; GO:0005737 cytoplasm; GO:0005783 endoplasmic reticulum; GO:0005886 plasma membrane; GO:0005887 integral component of plasma membrane; GO:0012505 endomembrane system; GO:0016020 membrane; GO:0016021 integral component of membrane; GO:0016323 basolateral plasma membrane; GO:0016324 apical plasma membrane; GO:0031224 intrinsic component of membrane; GO:0031…	GO:0005215 transporter activity; GO:0005216 ion channel activity; GO:0005244 voltage-gated ion channel activity; GO:0005247 voltage-gated chloride channel activity; GO:0005253 anion channel activity; GO:0005254 chloride channel activity; GO:0005488 binding; GO:0005515 protein binding; GO:0008308 voltage-gated anion channel activity; GO:0008509 anion transmembrane transporter activity; GO:0015075 …	PF00571	CBS domain	P	KOG0476	Cl- channel CLC-2 and related proteins (CLC superfamily)
Q3MID7	Lipopolysaccharide-binding protein OS=Rattus norvegicus OX=10116 GN=Lbp PE=1 SV=1	Lbp	1.8088	0.000296552	Up	53.497	23.3	10	10	1.0906	1.24581	1.13519	1.18311	1.23257	1.19343	0.674545	0.639186	0.60555	extracellular	K05399	LBP; lipopolysaccharide-binding protein	rno04620 Toll-like receptor signaling pathway; rno04064 NF-kappa B signaling pathway; rno05152 Tuberculosis	GO:0001775 cell activation; GO:0001817 regulation of cytokine production; GO:0001818 negative regulation of cytokine production; GO:0001819 positive regulation of cytokine production; GO:0001889 liver development; GO:0002218 activation of innate immune response; GO:0002221 pattern recognition receptor signaling pathway; GO:0002224 toll-like receptor signaling pathway; GO:0002232 leukocyte chemota…	GO:0005576 extracellular region; GO:0005615 extracellular space; GO:0005623 cell; GO:0009986 cell surface;	GO:0001530 lipopolysaccharide binding; GO:0005102 signaling receptor binding; GO:0005488 binding; GO:0005515 protein binding; GO:0008289 lipid binding; GO:0033218 amide binding; GO:0042277 peptide binding; GO:0070891 lipoteichoic acid binding; GO:0071723 lipopeptide binding; GO:0097367 carbohydrate derivative binding;	PF02886	LBP / BPI / CETP family, C-terminal domain	V	KOG4160	BPI/LBP/CETP family protein
Q3T1J4	Polypeptide N-acetylgalactosaminyltransferase OS=Rattus norvegicus OX=10116 GN=Galnt3 PE=2 SV=1	Galnt3	0.5237	0.00383668	Down	73.003	7	3	3	0.628899	0.75686		0.794616		0.850333	1.39205	1.25175	1.32549	Golgi apparatus	K00710	GALNT; polypeptide N-acetylgalactosaminyltransferase [EC:2.4.1.41]	rno00514 Other types of O-glycan biosynthesis; rno01100 Metabolic pathways; rno00512 Mucin type O-glycan biosynthesis	GO:0005975 carbohydrate metabolic process; GO:0006464 cellular protein modification process; GO:0006486 protein glycosylation; GO:0006493 protein O-linked glycosylation; GO:0006807 nitrogen compound metabolic process; GO:0007154 cell communication; GO:0007165 signal transduction; GO:0007166 cell surface receptor signaling pathway; GO:0007167 enzyme linked receptor protein signaling pathway; GO:00…	GO:0000139 Golgi membrane; GO:0005622 intracellular; GO:0005623 cell; GO:0005737 cytoplasm; GO:0005794 Golgi apparatus; GO:0012505 endomembrane system; GO:0016020 membrane; GO:0016021 integral component of membrane; GO:0031090 organelle membrane; GO:0031224 intrinsic component of membrane; GO:0031984 organelle subcompartment; GO:0043226 organelle; GO:0043227 membrane-bounded organelle; GO:0043229…	GO:0003824 catalytic activity; GO:0004653 polypeptide N-acetylgalactosaminyltransferase activity; GO:0005488 binding; GO:0005509 calcium ion binding; GO:0008194 UDP-glycosyltransferase activity; GO:0008376 acetylgalactosaminyltransferase activity; GO:0016740 transferase activity; GO:0016757 transferase activity, transferring glycosyl groups; GO:0016758 transferase activity, transferring hexosyl g…	PF00652	Ricin-type beta-trefoil lectin domain	O	KOG3736	Polypeptide N-acetylgalactosaminyltransferase
Q5I0H9	Protein disulfide-isomerase A5 OS=Rattus norvegicus OX=10116 GN=Pdia5 PE=2 SV=1	Pdia5	2.5968	2.12269e-05	Up	59.399	15.1	8	8	1.87086	1.7622	1.89466	0.484104	0.355047	0.504433	0.757198	0.672164	0.699328	extracellular	K09583			GO:0006457 protein folding; GO:0006950 response to stress; GO:0006986 response to unfolded protein; GO:0007154 cell communication; GO:0007165 signal transduction; GO:0008152 metabolic process; GO:0009987 cellular process; GO:0010033 response to organic substance; GO:0023052 signaling; GO:0030968 endoplasmic reticulum unfolded protein response; GO:0033554 cellular response to stress; GO:0034620 ce…	GO:0005622 intracellular; GO:0005623 cell; GO:0005737 cytoplasm; GO:0005783 endoplasmic reticulum; GO:0005788 endoplasmic reticulum lumen; GO:0005789 endoplasmic reticulum membrane; GO:0012505 endomembrane system; GO:0016020 membrane; GO:0031974 membrane-enclosed lumen; GO:0031984 organelle subcompartment; GO:0042175 nuclear outer membrane-endoplasmic reticulum membrane network; GO:0043226 organe…	GO:0003756 protein disulfide isomerase activity; GO:0003824 catalytic activity; GO:0015036 disulfide oxidoreductase activity; GO:0015037 peptide disulfide oxidoreductase activity; GO:0016491 oxidoreductase activity; GO:0016667 oxidoreductase activity, acting on a sulfur group of donors; GO:0016853 isomerase activity; GO:0016860 intramolecular oxidoreductase activity; GO:0016864 intramolecular oxi…	PF00085	Thioredoxin	O	KOG0191	Thioredoxin/protein disulfide isomerase
Q5I0I4	Distal membrane-arm assembly complex protein 2 OS=Rattus norvegicus OX=10116 GN=Dmac2 PE=2 SV=1	Dmac2	0.6235	0.0441346	Down	28.507	22	4	4	0.816981	0.484061	0.792648	1.07101	1.42769	1.04957	1.06061	1.1303	1.16713	mitochondria				GO:0006996 organelle organization; GO:0007005 mitochondrion organization; GO:0009987 cellular process; GO:0010257 NADH dehydrogenase complex assembly; GO:0016043 cellular component organization; GO:0022607 cellular component assembly; GO:0032981 mitochondrial respiratory chain complex I assembly; GO:0033108 mitochondrial respiratory chain complex assembly; GO:0034622 cellular protein-containing c…					S	KOG3864	Uncharacterized conserved protein
Q5M883	Chloride intracellular channel protein 2 OS=Rattus norvegicus OX=10116 GN=Clic2 PE=2 SV=1	Clic2	1.6959	0.00101057	Up	28.161	32.2	6	5	1.31556	1.19647	1.25083	1.0219	0.962597	1.0338	0.691298	0.823233	0.704316	cytoplasm	K05022			GO:0006810 transport; GO:0006811 ion transport; GO:0006820 anion transport; GO:0006821 chloride transport; GO:0006937 regulation of muscle contraction; GO:0006942 regulation of striated muscle contraction; GO:0007154 cell communication; GO:0007165 signal transduction; GO:0008016 regulation of heart contraction; GO:0008152 metabolic process; GO:0009636 response to toxic substance; GO:0009966 regul…	GO:0005622 intracellular; GO:0005623 cell; GO:0005634 nucleus; GO:0005737 cytoplasm; GO:0043226 organelle; GO:0043227 membrane-bounded organelle; GO:0043229 intracellular organelle; GO:0043231 intracellular membrane-bounded organelle;	GO:0003824 catalytic activity; GO:0004601 peroxidase activity; GO:0004602 glutathione peroxidase activity; GO:0005215 transporter activity; GO:0005216 ion channel activity; GO:0005253 anion channel activity; GO:0005254 chloride channel activity; GO:0008509 anion transmembrane transporter activity; GO:0015075 ion transmembrane transporter activity; GO:0015103 inorganic anion transmembrane transpor…	PF13409; PF13410	Glutathione S-transferase, N-terminal domain; Glutathione S-transferase, C-terminal domain	P	KOG1422	Intracellular Cl- channel CLIC, contains GST domain
Q62669	Globin a1 OS=Rattus norvegicus OX=10116 GN=LOC103694855 PE=1 SV=1	LOC103694855	0.6159	0.00400673	Down	16.022	85.7	13	2	0.794782	0.823857	0.687908	0.920036	1.10827	0.920353	1.37193	1.11588	1.25698	cytoplasm	K13823	HBB; hemoglobin subunit beta	rno05144 Malaria; rno05143 African trypanosomiasis	GO:0000302 response to reactive oxygen species; GO:0001505 regulation of neurotransmitter levels; GO:0001775 cell activation; GO:0001932 regulation of protein phosphorylation; GO:0002252 immune effector process; GO:0002262 myeloid cell homeostasis; GO:0002263 cell activation involved in immune response; GO:0002274 myeloid leukocyte activation; GO:0002275 myeloid cell activation involved in immune…	GO:0005576 extracellular region; GO:0005615 extracellular space; GO:0005622 intracellular; GO:0005623 cell; GO:0005737 cytoplasm; GO:0005829 cytosol; GO:0005833 hemoglobin complex; GO:0012505 endomembrane system; GO:0030139 endocytic vesicle; GO:0030141 secretory granule; GO:0031410 cytoplasmic vesicle; GO:0031838 haptoglobin-hemoglobin complex; GO:0031974 membrane-enclosed lumen; GO:0031982 vesi…	GO:0005344 oxygen carrier activity; GO:0005488 binding; GO:0005515 protein binding; GO:0008144 drug binding; GO:0019825 oxygen binding; GO:0030492 hemoglobin binding; GO:0031721 hemoglobin alpha binding; GO:0031722 hemoglobin beta binding; GO:0036094 small molecule binding; GO:0140104 molecular carrier activity;	PF00042	Globin	C	KOG3378	Globins and related hemoproteins
Q63342	Dimethylglycine dehydrogenase, mitochondrial OS=Rattus norvegicus OX=10116 GN=Dmgdh PE=1 SV=1	Dmgdh	0.3537	0.000411628	Down	96.046	64.9	40	3	0.542855	0.554034	0.497797	0.921652	1.07815	0.89664	1.72571	1.51569	1.26747	mitochondria	K00315	DMGDH; dimethylglycine dehydrogenase [EC:1.5.8.4]	rno01100 Metabolic pathways; rno00260 Glycine, serine and threonine metabolism	GO:0001505 regulation of neurotransmitter levels; GO:0006082 organic acid metabolic process; GO:0006091 generation of precursor metabolites and energy; GO:0006575 cellular modified amino acid metabolic process; GO:0006576 cellular biogenic amine metabolic process; GO:0006725 cellular aromatic compound metabolic process; GO:0006730 one-carbon metabolic process; GO:0006732 coenzyme metabolic proces…	GO:0005622 intracellular; GO:0005623 cell; GO:0005737 cytoplasm; GO:0005739 mitochondrion; GO:0005759 mitochondrial matrix; GO:0031974 membrane-enclosed lumen; GO:0043226 organelle; GO:0043227 membrane-bounded organelle; GO:0043229 intracellular organelle; GO:0043231 intracellular membrane-bounded organelle; GO:0043233 organelle lumen; GO:0070013 intracellular organelle lumen;	GO:0000166 nucleotide binding; GO:0003824 catalytic activity; GO:0005488 binding; GO:0005542 folic acid binding; GO:0008144 drug binding; GO:0009055 electron transfer activity; GO:0016491 oxidoreductase activity; GO:0016645 oxidoreductase activity, acting on the CH-NH group of donors; GO:0019842 vitamin binding; GO:0031406 carboxylic acid binding; GO:0033218 amide binding; GO:0036094 small molecu…	PF01266; PF01571; PF08669	FAD dependent oxidoreductase; Aminomethyltransferase folate-binding domain; Glycine cleavage T-protein C-terminal barrel domain	E	KOG2844	Dimethylglycine dehydrogenase precursor
Q63910	Alpha globin OS=Rattus norvegicus OX=10116 GN=Hba-a3 PE=1 SV=2	Hba-a3	0.5609	0.000127027	Down	15.524	92.3	11	9	0.671185	0.70932	0.710563	1.10983	1.0994	0.971458	1.26005	1.30653	1.16166	cytoplasm	K13822	HBA; hemoglobin subunit alpha	rno05144 Malaria; rno05143 African trypanosomiasis	GO:0001701 in utero embryonic development; GO:0002262 myeloid cell homeostasis; GO:0002376 immune system process; GO:0002520 immune system development; GO:0003008 system process; GO:0003013 circulatory system process; GO:0007275 multicellular organism development; GO:0008015 blood circulation; GO:0008217 regulation of blood pressure; GO:0009790 embryo development; GO:0009792 embryo development en…	GO:0005576 extracellular region; GO:0005615 extracellular space; GO:0005622 intracellular; GO:0005623 cell; GO:0005737 cytoplasm; GO:0005829 cytosol; GO:0005833 hemoglobin complex; GO:0005840 ribosome; GO:0015935 small ribosomal subunit; GO:0022626 cytosolic ribosome; GO:0022627 cytosolic small ribosomal subunit; GO:0031838 haptoglobin-hemoglobin complex; GO:0032991 protein-containing complex; GO…	GO:0001540 amyloid-beta binding; GO:0005488 binding; GO:0020037 heme binding; GO:0033218 amide binding; GO:0036094 small molecule binding; GO:0042277 peptide binding; GO:0043177 organic acid binding; GO:0046906 tetrapyrrole binding; GO:0048037 cofactor binding; GO:0097159 organic cyclic compound binding; GO:1901363 heterocyclic compound binding;	PF00042	Globin	C	KOG3378	Globins and related hemoproteins
Q66HK3	Cyclooxygenase-1 OS=Rattus norvegicus OX=10116 GN=Ptgs1 PE=1 SV=1	Ptgs1	2.119	0.0460697	Up	69.046	18.6	8	8	1.18511	1.16583	1.50001	0.860394	1.12323	1.34805	0.339348	0.612887	0.865145	mitochondria	K00509	PTGS1; prostaglandin-endoperoxide synthase 1 [EC:1.14.99.1]	rno01100 Metabolic pathways; rno00590 Arachidonic acid metabolism; rno04923 Regulation of lipolysis in adipocytes; rno04726 Serotonergic synapse; rno04611 Platelet activation	GO:0001101 response to acid chemical; GO:0001516 prostaglandin biosynthetic process; GO:0001676 long-chain fatty acid metabolic process; GO:0003008 system process; GO:0003013 circulatory system process; GO:0003018 vascular process in circulatory system; GO:0006082 organic acid metabolic process; GO:0006629 lipid metabolic process; GO:0006631 fatty acid metabolic process; GO:0006633 fatty acid bio…	GO:0001750 photoreceptor outer segment; GO:0005622 intracellular; GO:0005623 cell; GO:0005634 nucleus; GO:0005635 nuclear envelope; GO:0005737 cytoplasm; GO:0005783 endoplasmic reticulum; GO:0005789 endoplasmic reticulum membrane; GO:0005794 Golgi apparatus; GO:0005929 cilium; GO:0012505 endomembrane system; GO:0016020 membrane; GO:0031090 organelle membrane; GO:0031967 organelle envelope; GO:003…	GO:0003824 catalytic activity; GO:0004601 peroxidase activity; GO:0004666 prostaglandin-endoperoxide synthase activity; GO:0005488 binding; GO:0005515 protein binding; GO:0008144 drug binding; GO:0016209 antioxidant activity; GO:0016491 oxidoreductase activity; GO:0016684 oxidoreductase activity, acting on peroxide as acceptor; GO:0016705 oxidoreductase activity, acting on paired donors, with inc…	PF03098	Animal haem peroxidase	S	KOG2408	Peroxidase/oxygenase
Q68FT5	S-methylmethionine--homocysteine S-methyltransferase BHMT2 OS=Rattus norvegicus OX=10116 GN=Bhmt2 PE=2 SV=1	Bhmt2	2.018	3.40291e-05	Up	39.928	56.2	15	13	1.39513	1.47118	1.37919	0.931117	0.829732	0.889843	0.664215	0.709088	0.730497	cytoplasm	K00547	mmuM; homocysteine S-methyltransferase [EC:2.1.1.10]	rno01100 Metabolic pathways; rno00270 Cysteine and methionine metabolism	GO:0000096 sulfur amino acid metabolic process; GO:0000097 sulfur amino acid biosynthetic process; GO:0006082 organic acid metabolic process; GO:0006520 cellular amino acid metabolic process; GO:0006555 methionine metabolic process; GO:0006575 cellular modified amino acid metabolic process; GO:0006732 coenzyme metabolic process; GO:0006790 sulfur compound metabolic process; GO:0006807 nitrogen co…	GO:0005622 intracellular; GO:0005623 cell; GO:0005737 cytoplasm; GO:0005829 cytosol;	GO:0003824 catalytic activity; GO:0005488 binding; GO:0008168 methyltransferase activity; GO:0008172 S-methyltransferase activity; GO:0008270 zinc ion binding; GO:0008757 S-adenosylmethionine-dependent methyltransferase activity; GO:0008898 S-adenosylmethionine-homocysteine S-methyltransferase activity; GO:0016740 transferase activity; GO:0016741 transferase activity, transferring one-carbon grou…			E	KOG1579	Homocysteine S-methyltransferase
Q6AYC4	Macrophage-capping protein OS=Rattus norvegicus OX=10116 GN=Capg PE=1 SV=1	Capg	1.9001	0.00460456	Up	38.798	37.5	9	8	1.22826	1.31313	1.21596	1.04943	1.06368	1.15213	0.792531	0.646355	0.538525	cytoplasm,nucleus	K10368			GO:0002376 immune system process; GO:0006950 response to stress; GO:0006952 defense response; GO:0006955 immune response; GO:0008064 regulation of actin polymerization or depolymerization; GO:0009987 cellular process; GO:0010033 response to organic substance; GO:0010639 negative regulation of organelle organization; GO:0016043 cellular component organization; GO:0022607 cellular component assembl…	GO:0005622 intracellular; GO:0005623 cell; GO:0005634 nucleus; GO:0005654 nucleoplasm; GO:0005730 nucleolus; GO:0005737 cytoplasm; GO:0005814 centriole; GO:0005815 microtubule organizing center; GO:0005819 spindle; GO:0005856 cytoskeleton; GO:0008290 F-actin capping protein complex; GO:0015629 actin cytoskeleton; GO:0015630 microtubule cytoskeleton; GO:0030139 endocytic vesicle; GO:0030496 midbod…	GO:0005488 binding; GO:0005515 protein binding; GO:0019904 protein domain specific binding; GO:0044877 protein-containing complex binding;	PF00626	Gelsolin repeat	Z	KOG0443	Actin regulatory proteins (gelsolin/villin family)
Q6AYD6	PDZ and LIM domain protein 2 OS=Rattus norvegicus OX=10116 GN=Pdlim2 PE=1 SV=1	Pdlim2	1.502	0.00625491	Up	37.58	11.2	3	3	1.33276	1.32974	1.17013	0.78575	0.960384	0.869547	0.930882	0.748169	0.87264	nucleus	K23353				GO:0005622 intracellular; GO:0005623 cell; GO:0005634 nucleus; GO:0005737 cytoplasm; GO:0005856 cytoskeleton; GO:0043226 organelle; GO:0043227 membrane-bounded organelle; GO:0043228 non-membrane-bounded organelle; GO:0043229 intracellular organelle; GO:0043231 intracellular membrane-bounded organelle; GO:0043232 intracellular non-membrane-bounded organelle;	GO:0005488 binding; GO:0005515 protein binding; GO:0008092 cytoskeletal protein binding; GO:0017022 myosin binding; GO:0031005 filamin binding; GO:0032036 myosin heavy chain binding; GO:0042805 actinin binding; GO:0051371 muscle alpha-actinin binding; GO:0051393 alpha-actinin binding;	PF00595; PF00412	PDZ domain (Also known as DHR or GLGF); LIM domain	TZ	KOG1703	Adaptor protein Enigma and related PDZ-LIM proteins
Q6AYQ3	Phenylalanine--tRNA ligase, mitochondrial OS=Rattus norvegicus OX=10116 GN=Fars2 PE=2 SV=1	Fars2	0.6325	0.00285646	Down	55.164	11.4	4	4	0.888829	0.81736	0.777767	0.772692	1.1006	1.02446	1.32218		1.29612	mitochondria	K01889	FARSA; phenylalanyl-tRNA synthetase alpha chain [EC:6.1.1.20]	rno00970 Aminoacyl-tRNA biosynthesis	GO:0006082 organic acid metabolic process; GO:0006139 nucleobase-containing compound metabolic process; GO:0006396 RNA processing; GO:0006399 tRNA metabolic process; GO:0006412 translation; GO:0006418 tRNA aminoacylation for protein translation; GO:0006432 phenylalanyl-tRNA aminoacylation; GO:0006518 peptide metabolic process; GO:0006520 cellular amino acid metabolic process; GO:0006725 cellular …	GO:0005622 intracellular; GO:0005623 cell; GO:0005737 cytoplasm; GO:0005739 mitochondrion; GO:0005759 mitochondrial matrix; GO:0031974 membrane-enclosed lumen; GO:0043226 organelle; GO:0043227 membrane-bounded organelle; GO:0043229 intracellular organelle; GO:0043231 intracellular membrane-bounded organelle; GO:0043233 organelle lumen; GO:0070013 intracellular organelle lumen;	GO:0000049 tRNA binding; GO:0003676 nucleic acid binding; GO:0003723 RNA binding; GO:0003824 catalytic activity; GO:0004812 aminoacyl-tRNA ligase activity; GO:0004826 phenylalanine-tRNA ligase activity; GO:0005488 binding; GO:0016874 ligase activity; GO:0016875 ligase activity, forming carbon-oxygen bonds; GO:0097159 organic cyclic compound binding; GO:0140098 catalytic activity, acting on RNA; G…	PF01409; PF03147	tRNA synthetases class II core domain (F); Ferredoxin-fold anticodon binding domain	J	KOG2783	Phenylalanyl-tRNA synthetase
Q6AYT0	Quinone oxidoreductase OS=Rattus norvegicus OX=10116 GN=Cryz PE=2 SV=1	Cryz	0.6624	2.87474e-05	Down	34.975	70.5	20	20	0.763454	0.762499	0.754775	1.0935	1.08507	1.09774	1.14084	1.18847	1.11364	cytoplasm	K00344			GO:0003008 system process; GO:0006805 xenobiotic metabolic process; GO:0007600 sensory perception; GO:0007601 visual perception; GO:0008152 metabolic process; GO:0009056 catabolic process; GO:0009410 response to xenobiotic stimulus; GO:0009987 cellular process; GO:0016043 cellular component organization; GO:0022607 cellular component assembly; GO:0032501 multicellular organismal process; GO:00421…	GO:0005622 intracellular; GO:0005623 cell; GO:0005737 cytoplasm; GO:0005829 cytosol;	GO:0000166 nucleotide binding; GO:0003676 nucleic acid binding; GO:0003723 RNA binding; GO:0003729 mRNA binding; GO:0003730 mRNA 3'-UTR binding; GO:0003824 catalytic activity; GO:0003960 NADPH:quinone reductase activity; GO:0005198 structural molecule activity; GO:0005212 structural constituent of eye lens; GO:0005488 binding; GO:0016491 oxidoreductase activity; GO:0016651 oxidoreductase activity…	PF08240	Alcohol dehydrogenase GroES-like domain	C	KOG1198	Zinc-binding oxidoreductase
Q6P7A9	Lysosomal alpha-glucosidase OS=Rattus norvegicus OX=10116 GN=Gaa PE=2 SV=1	Gaa	1.6158	0.00182454	Up	106.21	21.3	14	2	1.19954	1.25759	1.26984		0.995143	0.971251	0.726738	0.868715	0.711189	extracellular	K12316	GAA; lysosomal alpha-glucosidase [EC:3.2.1.20]	rno04142 Lysosome; rno01100 Metabolic pathways; rno00500 Starch and sucrose metabolism; rno00052 Galactose metabolism	GO:0000023 maltose metabolic process; GO:0000272 polysaccharide catabolic process; GO:0001775 cell activation; GO:0002026 regulation of the force of heart contraction; GO:0002086 diaphragm contraction; GO:0002252 immune effector process; GO:0002263 cell activation involved in immune response; GO:0002274 myeloid leukocyte activation; GO:0002275 myeloid cell activation involved in immune response; …	GO:0000323 lytic vacuole; GO:0005622 intracellular; GO:0005623 cell; GO:0005737 cytoplasm; GO:0005764 lysosome; GO:0005765 lysosomal membrane; GO:0005766 primary lysosome; GO:0005773 vacuole; GO:0005774 vacuolar membrane; GO:0005775 vacuolar lumen; GO:0005886 plasma membrane; GO:0012505 endomembrane system; GO:0012506 vesicle membrane; GO:0016020 membrane; GO:0030141 secretory granule; GO:0030659…	GO:0003824 catalytic activity; GO:0004553 hydrolase activity, hydrolyzing O-glycosyl compounds; GO:0004558 alpha-1,4-glucosidase activity; GO:0005488 binding; GO:0015926 glucosidase activity; GO:0016787 hydrolase activity; GO:0016798 hydrolase activity, acting on glycosyl bonds; GO:0030246 carbohydrate binding; GO:0090599 alpha-glucosidase activity;	PF00088; PF13802	Trefoil (P-type) domain; Galactose mutarotase-like	G	KOG1065	Maltase glucoamylase and related hydrolases, glycosyl hydrolase family 31
Q99376	Transferrin receptor protein 1 OS=Rattus norvegicus OX=10116 GN=Tfrc PE=1 SV=2	Tfrc	0.6096	0.00179965	Down	85.875	13.3	9	9	0.725305	0.814981	0.755177	0.992109	1.11949	0.827326	1.22069	1.39565	1.14927	plasma membrane	K06503	TFRC; transferrin receptor	rno04216 Ferroptosis; rno04640 Hematopoietic cell lineage; rno04145 Phagosome; rno04066 HIF-1 signaling pathway; rno04144 Endocytosis	GO:0000018 regulation of DNA recombination; GO:0000041 transition metal ion transport; GO:0001101 response to acid chemical; GO:0001666 response to hypoxia; GO:0002376 immune system process; GO:0002520 immune system development; GO:0002521 leukocyte differentiation; GO:0002526 acute inflammatory response; GO:0002573 myeloid leukocyte differentiation; GO:0002637 regulation of immunoglobulin produc…	GO:0005576 extracellular region; GO:0005615 extracellular space; GO:0005622 intracellular; GO:0005623 cell; GO:0005634 nucleus; GO:0005737 cytoplasm; GO:0005739 mitochondrion; GO:0005768 endosome; GO:0005769 early endosome; GO:0005886 plasma membrane; GO:0005887 integral component of plasma membrane; GO:0005905 clathrin-coated pit; GO:0009897 external side of plasma membrane; GO:0009986 cell surf…	GO:0003676 nucleic acid binding; GO:0003723 RNA binding; GO:0003725 double-stranded RNA binding; GO:0004998 transferrin receptor activity; GO:0005215 transporter activity; GO:0005381 iron ion transmembrane transporter activity; GO:0005488 binding; GO:0005515 protein binding; GO:0008324 cation transmembrane transporter activity; GO:0015075 ion transmembrane transporter activity; GO:0015318 inorgan…	PF04253	Transferrin receptor-like dimerisation domain	OP	KOG2195	Transferrin receptor and related proteins containing the protease-associated (PA) domain
Q9R066	Coxsackievirus and adenovirus receptor homolog OS=Rattus norvegicus OX=10116 GN=Cxadr PE=1 SV=2	Cxadr	1.6338	0.00153602	Up	39.948	17	5	5	1.15876	1.19628	1.38101	1.00069	0.945226	1.03131	0.769823	0.714952	0.801957	plasma membrane	K06788	CXADR; coxsackievirus and adenovirus receptor	rno05416 Viral myocarditis	GO:0000003 reproduction; GO:0001775 cell activation; GO:0001894 tissue homeostasis; GO:0002252 immune effector process; GO:0002376 immune system process; GO:0002682 regulation of immune system process; GO:0006810 transport; GO:0006928 movement of cell or subcellular component; GO:0006935 chemotaxis; GO:0006950 response to stress; GO:0006952 defense response; GO:0006996 organelle organization; GO:…	GO:0001669 acrosomal vesicle; GO:0005576 extracellular region; GO:0005615 extracellular space; GO:0005622 intracellular; GO:0005623 cell; GO:0005634 nucleus; GO:0005654 nucleoplasm; GO:0005737 cytoplasm; GO:0005886 plasma membrane; GO:0005887 integral component of plasma membrane; GO:0005911 cell-cell junction; GO:0005912 adherens junction; GO:0005923 bicellular tight junction; GO:0012505 endomem…	GO:0005102 signaling receptor binding; GO:0005178 integrin binding; GO:0005488 binding; GO:0005515 protein binding; GO:0008013 beta-catenin binding; GO:0019904 protein domain specific binding; GO:0030165 PDZ domain binding; GO:0042802 identical protein binding; GO:0044877 protein-containing complex binding; GO:0050839 cell adhesion molecule binding; GO:0071253 connexin binding; GO:0086080 protein…	PF07686; PF00047	Immunoglobulin V-set domain; Immunoglobulin domain
Q9R0W2	Solute carrier family 22 member 2 OS=Rattus norvegicus OX=10116 GN=Slc22a2 PE=1 SV=1	Slc22a2	1.5513	0.000127508	Up	62.342	12.4	8	2	1.43489	1.45854	1.32997	0.704717	0.671033	0.678279	0.90589	0.923319	0.893356	plasma membrane				GO:0001505 regulation of neurotransmitter levels; GO:0006810 transport; GO:0006811 ion transport; GO:0006812 cation transport; GO:0006820 anion transport; GO:0006836 neurotransmitter transport; GO:0006855 drug transmembrane transport; GO:0007154 cell communication; GO:0007267 cell-cell signaling; GO:0007268 chemical synaptic transmission; GO:0007269 neurotransmitter secretion; GO:0007589 body flu…	GO:0005623 cell; GO:0005886 plasma membrane; GO:0005887 integral component of plasma membrane; GO:0016020 membrane; GO:0016021 integral component of membrane; GO:0016323 basolateral plasma membrane; GO:0031224 intrinsic component of membrane; GO:0031226 intrinsic component of plasma membrane; GO:0071944 cell periphery; GO:0098590 plasma membrane region;	GO:0005215 transporter activity; GO:0005277 acetylcholine transmembrane transporter activity; GO:0005326 neurotransmitter transmembrane transporter activity; GO:0005488 binding; GO:0005496 steroid binding; GO:0008289 lipid binding; GO:0008324 cation transmembrane transporter activity; GO:0008504 monoamine transmembrane transporter activity; GO:0008509 anion transmembrane transporter activity; GO:…			S	KOG0255	Synaptic vesicle transporter SVOP and related transporters (major facilitator superfamily)
Q9Z1H9	Caveolae-associated protein 3 OS=Rattus norvegicus OX=10116 GN=Cavin3 PE=1 SV=1	Cavin3	1.8248	0.0145125	Up	27.91	18.3	3	3		1.43436	1.2398	1.07976	0.956062	0.824598		0.730675	0.73475	cytoplasm				GO:0001558 regulation of cell growth; GO:0001932 regulation of protein phosphorylation; GO:0001934 positive regulation of protein phosphorylation; GO:0006996 organelle organization; GO:0007010 cytoskeleton organization; GO:0007623 circadian rhythm; GO:0009892 negative regulation of metabolic process; GO:0009893 positive regulation of metabolic process; GO:0009966 regulation of signal transduction…	GO:0005622 intracellular; GO:0005623 cell; GO:0005737 cytoplasm; GO:0005886 plasma membrane; GO:0005901 caveola; GO:0016020 membrane; GO:0032991 protein-containing complex; GO:0044853 plasma membrane raft; GO:0045121 membrane raft; GO:0071944 cell periphery; GO:0098589 membrane region; GO:0098590 plasma membrane region; GO:0098805 whole membrane; GO:0098857 membrane microdomain;	GO:0005080 protein kinase C binding; GO:0005488 binding; GO:0005515 protein binding; GO:0019899 enzyme binding; GO:0019900 kinase binding; GO:0019901 protein kinase binding;

## Sheet: BvsA
Protein accession	Protein description	Gene name	B/A Ratio	B/A P value	Regulated Type	MW [kDa]	Coverage [%]	Peptides	Unique peptides	A1	A2	A3	B1	B2	B3	S1	S2	S3	Subcellular localization	KEGG KO No.	KEGG Gene	KEGG pathway	Biological Process	Cellular Component	Molecular Function	Pfam ID	Domain description	KOG category	KOG NO.	KOG description
A0A0G2K477	Immunoglobulin heavy constant mu OS=Rattus norvegicus OX=10116 GN=Ighm PE=4 SV=1	Ighm	1.5889	2.29979e-05	Up	51.136	25.5	8	4	0.735049	0.757211	0.756106	1.15198	1.19404	1.22637	1.09314	0.955923	1.13018	extracellular				GO:0002250 adaptive immune response; GO:0002252 immune effector process; GO:0002253 activation of immune response; GO:0002376 immune system process; GO:0002429 immune response-activating cell surface receptor signaling pathway; GO:0002443 leukocyte mediated immunity; GO:0002449 lymphocyte mediated immunity; GO:0002455 humoral immune response mediated by circulating immunoglobulin; GO:0002460 adap…	GO:0005576 extracellular region; GO:0005615 extracellular space; GO:0005623 cell; GO:0005886 plasma membrane; GO:0009897 external side of plasma membrane; GO:0009986 cell surface; GO:0016020 membrane; GO:0019814 immunoglobulin complex; GO:0032991 protein-containing complex; GO:0042571 immunoglobulin complex, circulating; GO:0071944 cell periphery; GO:0072562 blood microparticle; GO:0098552 side o…	GO:0003823 antigen binding; GO:0005102 signaling receptor binding; GO:0005488 binding; GO:0005515 protein binding; GO:0034987 immunoglobulin receptor binding;	PF07686; PF07654	Immunoglobulin V-set domain; Immunoglobulin C1-set domain
A0A0G2K4A0	RAB11 family-interacting protein 5 OS=Rattus norvegicus OX=10116 GN=Rab11fip5 PE=1 SV=1	Rab11fip5	0.5808	0.0403792	Down	68.761	41	16	4	1.20603	1.1294	1.51491	0.528542	0.785909	0.921963			0.913238	mitochondria				GO:0001678 cellular glucose homeostasis; GO:0002376 immune system process; GO:0002790 peptide secretion; GO:0002791 regulation of peptide secretion; GO:0002792 negative regulation of peptide secretion; GO:0006810 transport; GO:0006887 exocytosis; GO:0006950 response to stress; GO:0006952 defense response; GO:0006955 immune response; GO:0007154 cell communication; GO:0007267 cell-cell signaling; G…	GO:0005622 intracellular; GO:0005623 cell; GO:0005737 cytoplasm; GO:0005739 mitochondrion; GO:0005740 mitochondrial envelope; GO:0005741 mitochondrial outer membrane; GO:0005768 endosome; GO:0005769 early endosome; GO:0005794 Golgi apparatus; GO:0005815 microtubule organizing center; GO:0005856 cytoskeleton; GO:0012505 endomembrane system; GO:0015630 microtubule cytoskeleton; GO:0016020 membrane;…	GO:0005488 binding; GO:0005515 protein binding; GO:0008092 cytoskeletal protein binding; GO:0015631 tubulin binding; GO:0017016 Ras GTPase binding; GO:0017137 Rab GTPase binding; GO:0019899 enzyme binding; GO:0031267 small GTPase binding; GO:0043015 gamma-tubulin binding; GO:0051020 GTPase binding;	PF00168	C2 domain
A0A0G2K879	Cytochrome P450 2C11 OS=Rattus norvegicus OX=10116 GN=Cyp2c11 PE=1 SV=1	Cyp2c11	0.4736	0.00134988	Down	49.453	15.3	5	5	1.68116	1.49544	1.54818	0.724428	0.870449	0.642874		0.282508	0.754963	cytoplasm				GO:0001676 long-chain fatty acid metabolic process; GO:0006082 organic acid metabolic process; GO:0006629 lipid metabolic process; GO:0006631 fatty acid metabolic process; GO:0006690 icosanoid metabolic process; GO:0006805 xenobiotic metabolic process; GO:0008152 metabolic process; GO:0009410 response to xenobiotic stimulus; GO:0009987 cellular process; GO:0019369 arachidonic acid metabolic proce…	GO:0005622 intracellular; GO:0005623 cell; GO:0005737 cytoplasm; GO:0005783 endoplasmic reticulum; GO:0005789 endoplasmic reticulum membrane; GO:0012505 endomembrane system; GO:0016020 membrane; GO:0031090 organelle membrane; GO:0031984 organelle subcompartment; GO:0042175 nuclear outer membrane-endoplasmic reticulum membrane network; GO:0043226 organelle; GO:0043227 membrane-bounded organelle; G…	GO:0003824 catalytic activity; GO:0004497 monooxygenase activity; GO:0005488 binding; GO:0008144 drug binding; GO:0008390 testosterone 16-alpha-hydroxylase activity; GO:0008391 arachidonic acid monooxygenase activity; GO:0008392 arachidonic acid epoxygenase activity; GO:0008395 steroid hydroxylase activity; GO:0016491 oxidoreductase activity; GO:0016705 oxidoreductase activity, acting on paired d…	PF00067	Cytochrome P450	Q	KOG0156	Cytochrome P450 CYP2 subfamily
D3ZD40	Papilin, proteoglycan-like sulfated glycoprotein OS=Rattus norvegicus OX=10116 GN=Papln PE=1 SV=2	Papln	1.8269	0.0201946	Up	138.6	5.8	5	5	0.71161		0.581538	1.19289	1.34579	1.00498	1.00046	1.0516	1.11113	extracellular	K23624				GO:0005576 extracellular region; GO:0005604 basement membrane; GO:0031012 extracellular matrix; GO:0062023 collagen-containing extracellular matrix;		PF00090; PF00014; PF07679; PF13927; PF08686	Thrombospondin type 1 domain; Kunitz/Bovine pancreatic trypsin inhibitor domain; Immunoglobulin I-set domain; Immunoglobulin domain; PLAC (protease and lacunin) domain	OT	KOG4597	Serine proteinase inhibitor (KU family) with thrombospondin repeats
D3ZFS7	Lysophospholipase-like 1 OS=Rattus norvegicus OX=10116 GN=Lyplal1 PE=3 SV=2	Lyplal1	0.2629	1.11902e-05	Down	26.069	64.3	9	9	1.65426	1.66061	1.61897	0.458824	0.446611	0.391599	0.966181	0.879693	0.923245	mitochondria	K06999			GO:0002084 protein depalmitoylation; GO:0006464 cellular protein modification process; GO:0006807 nitrogen compound metabolic process; GO:0008152 metabolic process; GO:0009056 catabolic process; GO:0009057 macromolecule catabolic process; GO:0009987 cellular process; GO:0019538 protein metabolic process; GO:0030163 protein catabolic process; GO:0032879 regulation of localization; GO:0032880 regul…	GO:0005622 intracellular; GO:0005623 cell; GO:0005737 cytoplasm; GO:0005829 cytosol;	GO:0003824 catalytic activity; GO:0004620 phospholipase activity; GO:0004622 lysophospholipase activity; GO:0008474 palmitoyl-(protein) hydrolase activity; GO:0016298 lipase activity; GO:0016787 hydrolase activity; GO:0016788 hydrolase activity, acting on ester bonds; GO:0016790 thiolester hydrolase activity; GO:0052689 carboxylic ester hydrolase activity; GO:0098599 palmitoyl hydrolase activity;…	PF02230	Phospholipase/Carboxylesterase	I	KOG2112	Lysophospholipase
D3ZNJ5	Indolethylamine N-methyltransferase OS=Rattus norvegicus OX=10116 GN=Inmt PE=1 SV=1	Inmt	0.6372	7.40528e-05	Down	29.494	46.6	12	12	1.25945	1.22297	1.24228	0.818461	0.752238	0.80283	0.915647	0.998249	0.987867	cytoplasm	K00562	INMT; methyltransferase [EC:2.1.1.49 2.1.1.96]	rno01100 Metabolic pathways; rno00450 Selenocompound metabolism; rno00380 Tryptophan metabolism	GO:0006807 nitrogen compound metabolic process; GO:0008152 metabolic process; GO:0009308 amine metabolic process; GO:0032259 methylation; GO:0071704 organic substance metabolic process; GO:1901564 organonitrogen compound metabolic process;	GO:0005622 intracellular; GO:0005623 cell; GO:0005737 cytoplasm; GO:0005829 cytosol;	GO:0003824 catalytic activity; GO:0004790 thioether S-methyltransferase activity; GO:0008168 methyltransferase activity; GO:0008172 S-methyltransferase activity; GO:0008757 S-adenosylmethionine-dependent methyltransferase activity; GO:0016740 transferase activity; GO:0016741 transferase activity, transferring one-carbon groups; GO:0030748 amine N-methyltransferase activity; GO:0098615 dimethyl se…			M	KOG4564	Adenylate cyclase-coupled calcitonin receptor
D3ZQD3	Oxoglutarate dehydrogenase L OS=Rattus norvegicus OX=10116 GN=Ogdhl PE=1 SV=2	Ogdhl	1.6175	0.0102526	Up	114.64	21.5	19	10	0.567207	0.795365	0.70573	1.08147	1.20596	1.05795	1.19878	1.16171	1.22583	mitochondria	K00164	OGDH; 2-oxoglutarate dehydrogenase E1 component [EC:1.2.4.2]	rno01100 Metabolic pathways; rno00020 Citrate cycle (TCA cycle); rno01200 Carbon metabolism				PF02779	Transketolase, pyrimidine binding domain	G	KOG0450	2-oxoglutarate dehydrogenase, E1 subunit
D3ZWD6	Complement C8 alpha chain OS=Rattus norvegicus OX=10116 GN=C8a PE=1 SV=1	C8a	1.6317	0.00832392	Up	66.273	8.7	4	4		0.733254	0.679855	1.06673	1.2837	1.10816	1.02106	1.10477	1.00248	extracellular	K03997	C8A; complement component 8 subunit alpha	rno05020 Prion disease; rno04610 Complement and coagulation cascades; rno05322 Systemic lupus erythematosus; rno05171 Coronavirus disease - COVID-19; rno05146 Amoebiasis	GO:0002252 immune effector process; GO:0002253 activation of immune response; GO:0002376 immune system process; GO:0002673 regulation of acute inflammatory response; GO:0002682 regulation of immune system process; GO:0002684 positive regulation of immune system process; GO:0002697 regulation of immune effector process; GO:0002920 regulation of humoral immune response; GO:0006807 nitrogen compound…	GO:0005576 extracellular region; GO:0005579 membrane attack complex; GO:0005615 extracellular space; GO:0005623 cell; GO:0005886 plasma membrane; GO:0005887 integral component of plasma membrane; GO:0016020 membrane; GO:0016021 integral component of membrane; GO:0031224 intrinsic component of membrane; GO:0031226 intrinsic component of plasma membrane; GO:0032991 protein-containing complex; GO:00…	GO:0001848 complement binding; GO:0005488 binding; GO:0005515 protein binding; GO:0044877 protein-containing complex binding;	PF00090; PF01823	Thrombospondin type 1 domain; MAC/Perforin domain	T	KOG3535	Adaptor protein Disabled
D4A071	Serine hydrolase-like 2 OS=Rattus norvegicus OX=10116 GN=Serhl2 PE=4 SV=1	Serhl2	2.3242	0.00143315	Up	35.478	39.7	8	8	0.463499	0.514032	0.660872	1.25127	1.21823	1.33847	1.11485	1.15551	1.28327	cytoplasm					GO:0005622 intracellular; GO:0005623 cell; GO:0005737 cytoplasm; GO:0005777 peroxisome; GO:0031410 cytoplasmic vesicle; GO:0031982 vesicle; GO:0042579 microbody; GO:0043226 organelle; GO:0043227 membrane-bounded organelle; GO:0043229 intracellular organelle; GO:0043231 intracellular membrane-bounded organelle; GO:0048471 perinuclear region of cytoplasm; GO:0097708 intracellular vesicle;	GO:0003824 catalytic activity; GO:0016787 hydrolase activity;	PF00561	alpha/beta hydrolase fold	S	KOG1454	Predicted hydrolase/acyltransferase (alpha/beta hydrolase superfamily)
G3V778	Protein-serine/threonine kinase OS=Rattus norvegicus OX=10116 GN=Pdk4 PE=1 SV=1	Pdk4	0.4746	0.0327016	Down	46.609	12.6	4	4	0.846035	1.70499	1.51797	0.65206	0.674207	0.604744				mitochondria	K00898			GO:0001101 response to acid chemical; GO:0006082 organic acid metabolic process; GO:0006084 acetyl-CoA metabolic process; GO:0006085 acetyl-CoA biosynthetic process; GO:0006086 acetyl-CoA biosynthetic process from pyruvate; GO:0006090 pyruvate metabolic process; GO:0006109 regulation of carbohydrate metabolic process; GO:0006139 nucleobase-containing compound metabolic process; GO:0006140 regulat…	GO:0005622 intracellular; GO:0005623 cell; GO:0005737 cytoplasm; GO:0005739 mitochondrion; GO:0005759 mitochondrial matrix; GO:0031974 membrane-enclosed lumen; GO:0043226 organelle; GO:0043227 membrane-bounded organelle; GO:0043229 intracellular organelle; GO:0043231 intracellular membrane-bounded organelle; GO:0043233 organelle lumen; GO:0070013 intracellular organelle lumen;	GO:0000166 nucleotide binding; GO:0003824 catalytic activity; GO:0004672 protein kinase activity; GO:0004712 protein serine/threonine/tyrosine kinase activity; GO:0004740 pyruvate dehydrogenase (acetyl-transferring) kinase activity; GO:0005488 binding; GO:0005524 ATP binding; GO:0008144 drug binding; GO:0016301 kinase activity; GO:0016740 transferase activity; GO:0016772 transferase activity, tra…	PF02518	Histidine kinase-, DNA gyrase B-, and HSP90-like ATPase	T	KOG0787	Dehydrogenase kinase
G3V9I8	Ammonium transporter Rh type A OS=Rattus norvegicus OX=10116 GN=Rhag PE=1 SV=1	Rhag	1.6937	0.00410256	Up	49.1	6.2	2	2	0.584451	0.760379	0.635522	1.0373	1.21211	1.10469	1.30905		1.35651	plasma membrane	K06580			GO:0002262 myeloid cell homeostasis; GO:0002376 immune system process; GO:0002520 immune system development; GO:0006810 transport; GO:0006811 ion transport; GO:0006812 cation transport; GO:0006820 anion transport; GO:0006855 drug transmembrane transport; GO:0006873 cellular ion homeostasis; GO:0007275 multicellular organism development; GO:0009987 cellular process; GO:0015669 gas transport; GO:00…	GO:0005623 cell; GO:0005886 plasma membrane; GO:0005887 integral component of plasma membrane; GO:0016020 membrane; GO:0016021 integral component of membrane; GO:0031224 intrinsic component of membrane; GO:0031226 intrinsic component of plasma membrane; GO:0071944 cell periphery;	GO:0005215 transporter activity; GO:0005488 binding; GO:0005515 protein binding; GO:0008092 cytoskeletal protein binding; GO:0008324 cation transmembrane transporter activity; GO:0008519 ammonium transmembrane transporter activity; GO:0015075 ion transmembrane transporter activity; GO:0015267 channel activity; GO:0022803 passive transmembrane transporter activity; GO:0022840 leak channel activity…			P	KOG3796	Ammonium transporter RHBG
P02625	Parvalbumin alpha OS=Rattus norvegicus OX=10116 GN=Pvalb PE=1 SV=2	Pvalb	3.8389	0.00549283	Up	11.925	50	6	5		0.164573	0.247688	0.711885	0.730397	0.931687	1.70387	1.58989	1.92	cytoplasm	K23926			GO:0006873 cellular ion homeostasis; GO:0006874 cellular calcium ion homeostasis; GO:0006875 cellular metal ion homeostasis; GO:0009987 cellular process; GO:0019725 cellular homeostasis; GO:0030003 cellular cation homeostasis; GO:0042592 homeostatic process; GO:0048878 chemical homeostasis; GO:0050801 ion homeostasis; GO:0051480 regulation of cytosolic calcium ion concentration; GO:0055065 metal …	GO:0005622 intracellular; GO:0005623 cell; GO:0005634 nucleus; GO:0005737 cytoplasm; GO:0030424 axon; GO:0032991 protein-containing complex; GO:0036477 somatodendritic compartment; GO:0042995 cell projection; GO:0043005 neuron projection; GO:0043025 neuronal cell body; GO:0043195 terminal bouton; GO:0043226 organelle; GO:0043227 membrane-bounded organelle; GO:0043229 intracellular organelle; GO:0…	GO:0005488 binding; GO:0005509 calcium ion binding; GO:0005515 protein binding; GO:0042802 identical protein binding; GO:0042803 protein homodimerization activity; GO:0043167 ion binding; GO:0043169 cation binding; GO:0046872 metal ion binding; GO:0046982 protein heterodimerization activity; GO:0046983 protein dimerization activity;	PF13499	EF-hand domain pair	T	KOG0027	Calmodulin and related proteins (EF-Hand superfamily)
P02651	Apolipoprotein A-IV OS=Rattus norvegicus OX=10116 GN=Apoa4 PE=1 SV=2	Apoa4	1.5007	0.000462387	Up	44.456	47.8	15	15	0.583857	0.54885	0.547679	0.787198	0.864763	0.86981	1.68479	1.60908	1.50398	extracellular	K08760	APOA4; apolipoprotein A-IV	rno04977 Vitamin digestion and absorption; rno04979 Cholesterol metabolism; rno04975 Fat digestion and absorption	GO:0000302 response to reactive oxygen species; GO:0000303 response to superoxide; GO:0000305 response to oxygen radical; GO:0001523 retinoid metabolic process; GO:0002227 innate immune response in mucosa; GO:0002251 organ or tissue specific immune response; GO:0002376 immune system process; GO:0002385 mucosal immune response; GO:0006066 alcohol metabolic process; GO:0006629 lipid metabolic proce…	GO:0005576 extracellular region; GO:0005615 extracellular space; GO:0005622 intracellular; GO:0005623 cell; GO:0005737 cytoplasm; GO:0005768 endosome; GO:0005769 early endosome; GO:0005783 endoplasmic reticulum; GO:0005788 endoplasmic reticulum lumen; GO:0005829 cytosol; GO:0012505 endomembrane system; GO:0031410 cytoplasmic vesicle; GO:0031974 membrane-enclosed lumen; GO:0031982 vesicle; GO:0032…	GO:0005102 signaling receptor binding; GO:0005215 transporter activity; GO:0005319 lipid transporter activity; GO:0005488 binding; GO:0005496 steroid binding; GO:0005507 copper ion binding; GO:0005515 protein binding; GO:0005543 phospholipid binding; GO:0008047 enzyme activator activity; GO:0008289 lipid binding; GO:0015248 sterol transporter activity; GO:0015485 cholesterol binding; GO:0016209 a…	PF01442	Apolipoprotein A1/A4/E domain
P20760	Ig gamma-2A chain C region OS=Rattus norvegicus OX=10116 GN=Igg-2a PE=1 SV=1	Igg-2a	1.6034	0.000232017	Up	35.185	42.2	9	8	0.726297	0.692447	0.723683	1.08575	1.22008	1.12925	1.12987	1.17019	1.12243	nucleus				GO:0002250 adaptive immune response; GO:0002252 immune effector process; GO:0002253 activation of immune response; GO:0002376 immune system process; GO:0002429 immune response-activating cell surface receptor signaling pathway; GO:0002443 leukocyte mediated immunity; GO:0002449 lymphocyte mediated immunity; GO:0002455 humoral immune response mediated by circulating immunoglobulin; GO:0002460 adap…	GO:0005576 extracellular region; GO:0005615 extracellular space; GO:0005623 cell; GO:0005886 plasma membrane; GO:0009897 external side of plasma membrane; GO:0009986 cell surface; GO:0016020 membrane; GO:0019814 immunoglobulin complex; GO:0032991 protein-containing complex; GO:0042571 immunoglobulin complex, circulating; GO:0071944 cell periphery; GO:0072562 blood microparticle; GO:0098552 side o…	GO:0003823 antigen binding; GO:0005102 signaling receptor binding; GO:0005488 binding; GO:0005515 protein binding; GO:0034987 immunoglobulin receptor binding;	PF07654	Immunoglobulin C1-set domain
P47967	Galectin-5 OS=Rattus norvegicus OX=10116 GN=Lgals5 PE=1 SV=2	Lgals5	2.1794	0.000480415	Up	16.196	50.3	6	2	0.574801	0.583535	0.464925	1.16874	1.21806	1.15086	1.27405	1.31697	1.24805	cytoplasm,nucleus	K17522			GO:0000003 reproduction; GO:0000165 MAPK cascade; GO:0001817 regulation of cytokine production; GO:0001818 negative regulation of cytokine production; GO:0001819 positive regulation of cytokine production; GO:0001910 regulation of leukocyte mediated cytotoxicity; GO:0001911 negative regulation of leukocyte mediated cytotoxicity; GO:0001932 regulation of protein phosphorylation; GO:0001934 positiv…	GO:0005576 extracellular region; GO:0005615 extracellular space; GO:0005622 intracellular; GO:0005623 cell; GO:0005634 nucleus; GO:0005737 cytoplasm; GO:0005829 cytosol; GO:0043226 organelle; GO:0043227 membrane-bounded organelle; GO:0043229 intracellular organelle; GO:0043231 intracellular membrane-bounded organelle;	GO:0005102 signaling receptor binding; GO:0005488 binding; GO:0005515 protein binding; GO:0005534 galactose binding; GO:0008047 enzyme activator activity; GO:0016936 galactoside binding; GO:0019207 kinase regulator activity; GO:0019209 kinase activator activity; GO:0019887 protein kinase regulator activity; GO:0019899 enzyme binding; GO:0030234 enzyme regulator activity; GO:0030246 carbohydrate b…	PF00337	Galactoside-binding lectin	W	KOG3587	Galectin, galactose-binding lectin
Q5I0H9	Protein disulfide-isomerase A5 OS=Rattus norvegicus OX=10116 GN=Pdia5 PE=2 SV=1	Pdia5	0.2431	0.000227735	Down	59.399	15.1	8	8	1.87086	1.7622	1.89466	0.484104	0.355047	0.504433	0.757198	0.672164	0.699328	extracellular	K09583			GO:0006457 protein folding; GO:0006950 response to stress; GO:0006986 response to unfolded protein; GO:0007154 cell communication; GO:0007165 signal transduction; GO:0008152 metabolic process; GO:0009987 cellular process; GO:0010033 response to organic substance; GO:0023052 signaling; GO:0030968 endoplasmic reticulum unfolded protein response; GO:0033554 cellular response to stress; GO:0034620 ce…	GO:0005622 intracellular; GO:0005623 cell; GO:0005737 cytoplasm; GO:0005783 endoplasmic reticulum; GO:0005788 endoplasmic reticulum lumen; GO:0005789 endoplasmic reticulum membrane; GO:0012505 endomembrane system; GO:0016020 membrane; GO:0031974 membrane-enclosed lumen; GO:0031984 organelle subcompartment; GO:0042175 nuclear outer membrane-endoplasmic reticulum membrane network; GO:0043226 organe…	GO:0003756 protein disulfide isomerase activity; GO:0003824 catalytic activity; GO:0015036 disulfide oxidoreductase activity; GO:0015037 peptide disulfide oxidoreductase activity; GO:0016491 oxidoreductase activity; GO:0016667 oxidoreductase activity, acting on a sulfur group of donors; GO:0016853 isomerase activity; GO:0016860 intramolecular oxidoreductase activity; GO:0016864 intramolecular oxi…	PF00085	Thioredoxin	O	KOG0191	Thioredoxin/protein disulfide isomerase
Q63342	Dimethylglycine dehydrogenase, mitochondrial OS=Rattus norvegicus OX=10116 GN=Dmgdh PE=1 SV=1	Dmgdh	1.8163	0.000847436	Up	96.046	64.9	40	3	0.542855	0.554034	0.497797	0.921652	1.07815	0.89664	1.72571	1.51569	1.26747	mitochondria	K00315	DMGDH; dimethylglycine dehydrogenase [EC:1.5.8.4]	rno01100 Metabolic pathways; rno00260 Glycine, serine and threonine metabolism	GO:0001505 regulation of neurotransmitter levels; GO:0006082 organic acid metabolic process; GO:0006091 generation of precursor metabolites and energy; GO:0006575 cellular modified amino acid metabolic process; GO:0006576 cellular biogenic amine metabolic process; GO:0006725 cellular aromatic compound metabolic process; GO:0006730 one-carbon metabolic process; GO:0006732 coenzyme metabolic proces…	GO:0005622 intracellular; GO:0005623 cell; GO:0005737 cytoplasm; GO:0005739 mitochondrion; GO:0005759 mitochondrial matrix; GO:0031974 membrane-enclosed lumen; GO:0043226 organelle; GO:0043227 membrane-bounded organelle; GO:0043229 intracellular organelle; GO:0043231 intracellular membrane-bounded organelle; GO:0043233 organelle lumen; GO:0070013 intracellular organelle lumen;	GO:0000166 nucleotide binding; GO:0003824 catalytic activity; GO:0005488 binding; GO:0005542 folic acid binding; GO:0008144 drug binding; GO:0009055 electron transfer activity; GO:0016491 oxidoreductase activity; GO:0016645 oxidoreductase activity, acting on the CH-NH group of donors; GO:0019842 vitamin binding; GO:0031406 carboxylic acid binding; GO:0033218 amide binding; GO:0036094 small molecu…	PF01266; PF01571; PF08669	FAD dependent oxidoreductase; Aminomethyltransferase folate-binding domain; Glycine cleavage T-protein C-terminal barrel domain	E	KOG2844	Dimethylglycine dehydrogenase precursor
Q63910	Alpha globin OS=Rattus norvegicus OX=10116 GN=Hba-a3 PE=1 SV=2	Hba-a3	1.5211	0.000869788	Up	15.524	92.3	11	9	0.671185	0.70932	0.710563	1.10983	1.0994	0.971458	1.26005	1.30653	1.16166	cytoplasm	K13822	HBA; hemoglobin subunit alpha	rno05144 Malaria; rno05143 African trypanosomiasis	GO:0001701 in utero embryonic development; GO:0002262 myeloid cell homeostasis; GO:0002376 immune system process; GO:0002520 immune system development; GO:0003008 system process; GO:0003013 circulatory system process; GO:0007275 multicellular organism development; GO:0008015 blood circulation; GO:0008217 regulation of blood pressure; GO:0009790 embryo development; GO:0009792 embryo development en…	GO:0005576 extracellular region; GO:0005615 extracellular space; GO:0005622 intracellular; GO:0005623 cell; GO:0005737 cytoplasm; GO:0005829 cytosol; GO:0005833 hemoglobin complex; GO:0005840 ribosome; GO:0015935 small ribosomal subunit; GO:0022626 cytosolic ribosome; GO:0022627 cytosolic small ribosomal subunit; GO:0031838 haptoglobin-hemoglobin complex; GO:0032991 protein-containing complex; GO…	GO:0001540 amyloid-beta binding; GO:0005488 binding; GO:0020037 heme binding; GO:0033218 amide binding; GO:0036094 small molecule binding; GO:0042277 peptide binding; GO:0043177 organic acid binding; GO:0046906 tetrapyrrole binding; GO:0048037 cofactor binding; GO:0097159 organic cyclic compound binding; GO:1901363 heterocyclic compound binding;	PF00042	Globin	C	KOG3378	Globins and related hemoproteins
Q68FT5	S-methylmethionine--homocysteine S-methyltransferase BHMT2 OS=Rattus norvegicus OX=10116 GN=Bhmt2 PE=2 SV=1	Bhmt2	0.6244	0.000267484	Down	39.928	56.2	15	13	1.39513	1.47118	1.37919	0.931117	0.829732	0.889843	0.664215	0.709088	0.730497	cytoplasm	K00547	mmuM; homocysteine S-methyltransferase [EC:2.1.1.10]	rno01100 Metabolic pathways; rno00270 Cysteine and methionine metabolism	GO:0000096 sulfur amino acid metabolic process; GO:0000097 sulfur amino acid biosynthetic process; GO:0006082 organic acid metabolic process; GO:0006520 cellular amino acid metabolic process; GO:0006555 methionine metabolic process; GO:0006575 cellular modified amino acid metabolic process; GO:0006732 coenzyme metabolic process; GO:0006790 sulfur compound metabolic process; GO:0006807 nitrogen co…	GO:0005622 intracellular; GO:0005623 cell; GO:0005737 cytoplasm; GO:0005829 cytosol;	GO:0003824 catalytic activity; GO:0005488 binding; GO:0008168 methyltransferase activity; GO:0008172 S-methyltransferase activity; GO:0008270 zinc ion binding; GO:0008757 S-adenosylmethionine-dependent methyltransferase activity; GO:0008898 S-adenosylmethionine-homocysteine S-methyltransferase activity; GO:0016740 transferase activity; GO:0016741 transferase activity, transferring one-carbon grou…			E	KOG1579	Homocysteine S-methyltransferase
Q7TMB6	Aa2-174 OS=Rattus norvegicus OX=10116 GN=Acsm5 PE=1 SV=1	Acsm5	0.616	0.000193532	Down	106.89	11.2	8	8	1.14955	1.29284	1.18359	0.757234	0.745576	0.730862	1.07628	1.03258	1.03148	cytoplasm				GO:0006082 organic acid metabolic process; GO:0006139 nucleobase-containing compound metabolic process; GO:0006163 purine nucleotide metabolic process; GO:0006629 lipid metabolic process; GO:0006631 fatty acid metabolic process; GO:0006633 fatty acid biosynthetic process; GO:0006637 acyl-CoA metabolic process; GO:0006725 cellular aromatic compound metabolic process; GO:0006732 coenzyme metabolic …	GO:0005622 intracellular; GO:0005623 cell; GO:0005737 cytoplasm; GO:0005739 mitochondrion; GO:0005759 mitochondrial matrix; GO:0031974 membrane-enclosed lumen; GO:0043226 organelle; GO:0043227 membrane-bounded organelle; GO:0043229 intracellular organelle; GO:0043231 intracellular membrane-bounded organelle; GO:0043233 organelle lumen; GO:0070013 intracellular organelle lumen;	GO:0003824 catalytic activity; GO:0003996 acyl-CoA ligase activity; GO:0004321 fatty-acyl-CoA synthase activity; GO:0015645 fatty acid ligase activity; GO:0016405 CoA-ligase activity; GO:0016408 C-acyltransferase activity; GO:0016740 transferase activity; GO:0016746 transferase activity, transferring acyl groups; GO:0016747 transferase activity, transferring acyl groups other than amino-acyl grou…			I	KOG1175	Acyl-CoA synthetase
Q9R0W2	Solute carrier family 22 member 2 OS=Rattus norvegicus OX=10116 GN=Slc22a2 PE=1 SV=1	Slc22a2	0.4863	2.33028e-05	Down	62.342	12.4	8	2	1.43489	1.45854	1.32997	0.704717	0.671033	0.678279	0.90589	0.923319	0.893356	plasma membrane				GO:0001505 regulation of neurotransmitter levels; GO:0006810 transport; GO:0006811 ion transport; GO:0006812 cation transport; GO:0006820 anion transport; GO:0006836 neurotransmitter transport; GO:0006855 drug transmembrane transport; GO:0007154 cell communication; GO:0007267 cell-cell signaling; GO:0007268 chemical synaptic transmission; GO:0007269 neurotransmitter secretion; GO:0007589 body flu…	GO:0005623 cell; GO:0005886 plasma membrane; GO:0005887 integral component of plasma membrane; GO:0016020 membrane; GO:0016021 integral component of membrane; GO:0016323 basolateral plasma membrane; GO:0031224 intrinsic component of membrane; GO:0031226 intrinsic component of plasma membrane; GO:0071944 cell periphery; GO:0098590 plasma membrane region;	GO:0005215 transporter activity; GO:0005277 acetylcholine transmembrane transporter activity; GO:0005326 neurotransmitter transmembrane transporter activity; GO:0005488 binding; GO:0005496 steroid binding; GO:0008289 lipid binding; GO:0008324 cation transmembrane transporter activity; GO:0008504 monoamine transmembrane transporter activity; GO:0008509 anion transmembrane transporter activity; GO:…			S	KOG0255	Synaptic vesicle transporter SVOP and related transporters (major facilitator superfamily)

## Sheet: BvsS
Protein accession	Protein description	Gene name	B/S Ratio	B/S P value	Regulated Type	MW [kDa]	Coverage [%]	Peptides	Unique peptides	A1	A2	A3	B1	B2	B3	S1	S2	S3	Subcellular localization	KEGG KO No.	KEGG Gene	KEGG pathway	Biological Process	Cellular Component	Molecular Function	Pfam ID	Domain description	KOG category	KOG NO.	KOG description
A0A0G2JSW3	Globin a4 OS=Rattus norvegicus OX=10116 GN=Hbb PE=1 SV=1	Hbb	0.3592	0.00184218	Down	15.965	95.9	23	2				0.619289	0.567655	0.398747	1.43189	1.60099	1.38143	cytoplasm	K13823	HBB; hemoglobin subunit beta	rno05144 Malaria; rno05143 African trypanosomiasis	GO:0000302 response to reactive oxygen species; GO:0001505 regulation of neurotransmitter levels; GO:0001775 cell activation; GO:0001932 regulation of protein phosphorylation; GO:0002252 immune effector process; GO:0002262 myeloid cell homeostasis; GO:0002263 cell activation involved in immune response; GO:0002274 myeloid leukocyte activation; GO:0002275 myeloid cell activation involved in immune…	GO:0005576 extracellular region; GO:0005615 extracellular space; GO:0005622 intracellular; GO:0005623 cell; GO:0005737 cytoplasm; GO:0005829 cytosol; GO:0005833 hemoglobin complex; GO:0012505 endomembrane system; GO:0030139 endocytic vesicle; GO:0030141 secretory granule; GO:0031410 cytoplasmic vesicle; GO:0031838 haptoglobin-hemoglobin complex; GO:0031974 membrane-enclosed lumen; GO:0031982 vesi…	GO:0005344 oxygen carrier activity; GO:0005488 binding; GO:0005515 protein binding; GO:0008144 drug binding; GO:0019825 oxygen binding; GO:0030492 hemoglobin binding; GO:0031721 hemoglobin alpha binding; GO:0031722 hemoglobin beta binding; GO:0036094 small molecule binding; GO:0140104 molecular carrier activity;	PF00042	Globin	C	KOG3378	Globins and related hemoproteins
A0A0G2JZL9	Endothelial cell-selective adhesion molecule OS=Rattus norvegicus OX=10116 GN=Esam PE=1 SV=1	Esam	1.5178	0.0383887	Up	39.945	12.5	3	3	1.13133	1.12066	1.2139	1.04712	0.958614	1.33041	0.711998	0.621256	0.864712	plasma membrane				GO:0002376 immune system process; GO:0006928 movement of cell or subcellular component; GO:0007155 cell adhesion; GO:0007156 homophilic cell adhesion via plasma membrane adhesion molecules; GO:0009987 cellular process; GO:0016338 calcium-independent cell-cell adhesion via plasma membrane cell-adhesion molecules; GO:0016477 cell migration; GO:0022610 biological adhesion; GO:0040011 locomotion; GO:…	GO:0005623 cell; GO:0005886 plasma membrane; GO:0005911 cell-cell junction; GO:0005912 adherens junction; GO:0005923 bicellular tight junction; GO:0016020 membrane; GO:0030054 cell junction; GO:0043296 apical junction complex; GO:0070160 tight junction; GO:0070161 anchoring junction; GO:0071944 cell periphery;		PF07686; PF13927	Immunoglobulin V-set domain; Immunoglobulin domain
A0A0G2K3I3	Desmocollin 2 OS=Rattus norvegicus OX=10116 GN=Dsc2 PE=1 SV=1	Dsc2	1.6541	0.0478944	Up	94.073	3.4	2	2	1.20738	0.805096	1.14504	1.2375	1.08601	1.31767	0.504533	0.772657	0.924126	endoplasmic reticulum				GO:0002027 regulation of heart rate; GO:0006937 regulation of muscle contraction; GO:0006942 regulation of striated muscle contraction; GO:0006950 response to stress; GO:0007154 cell communication; GO:0007155 cell adhesion; GO:0007275 multicellular organism development; GO:0008016 regulation of heart contraction; GO:0008219 cell death; GO:0008544 epidermis development; GO:0009267 cellular respons…	GO:0001533 cornified envelope; GO:0005622 intracellular; GO:0005623 cell; GO:0005737 cytoplasm; GO:0005886 plasma membrane; GO:0005911 cell-cell junction; GO:0005912 adherens junction; GO:0014704 intercalated disc; GO:0016020 membrane; GO:0030054 cell junction; GO:0030057 desmosome; GO:0031410 cytoplasmic vesicle; GO:0031982 vesicle; GO:0043226 organelle; GO:0043227 membrane-bounded organelle; GO…	GO:0005488 binding; GO:0005515 protein binding; GO:0086080 protein binding involved in heterotypic cell-cell adhesion; GO:0086083 cell adhesive protein binding involved in bundle of His cell-Purkinje myocyte communication; GO:0098631 cell adhesion mediator activity; GO:0098632 cell-cell adhesion mediator activity;	PF08758; PF00028	Cadherin prodomain like; Cadherin domain	S	KOG3594	FOG: Cadherin repeats
Q5XFV4	Adipocyte-type fatty acid-binding protein OS=Rattus norvegicus OX=10116 GN=Fabp4 PE=1 SV=1	Fabp4	1.7463	0.00126147	Up	14.736	50.8	7	7	1.1991	1.35725	1.25897	1.14856	0.977643	1.17063	0.588442	0.628301	0.671102	cytoplasm				GO:0001816 cytokine production; GO:0001932 regulation of protein phosphorylation; GO:0001933 negative regulation of protein phosphorylation; GO:0006082 organic acid metabolic process; GO:0006355 regulation of transcription, DNA-templated; GO:0006469 negative regulation of protein kinase activity; GO:0006629 lipid metabolic process; GO:0006631 fatty acid metabolic process; GO:0006638 neutral lipid…	GO:0005622 intracellular; GO:0005623 cell; GO:0005634 nucleus; GO:0005654 nucleoplasm; GO:0005737 cytoplasm; GO:0005811 lipid droplet; GO:0005829 cytosol; GO:0031974 membrane-enclosed lumen; GO:0031981 nuclear lumen; GO:0043226 organelle; GO:0043227 membrane-bounded organelle; GO:0043228 non-membrane-bounded organelle; GO:0043229 intracellular organelle; GO:0043231 intracellular membrane-bounded …	GO:0005102 signaling receptor binding; GO:0005215 transporter activity; GO:0005319 lipid transporter activity; GO:0005324 long-chain fatty acid transporter activity; GO:0005488 binding; GO:0005504 fatty acid binding; GO:0005515 protein binding; GO:0008289 lipid binding; GO:0031406 carboxylic acid binding; GO:0033293 monocarboxylic acid binding; GO:0036041 long-chain fatty acid binding; GO:0036094…	PF00061	Lipocalin / cytosolic fatty-acid binding protein family	K	KOG4015	Fatty acid-binding protein FABP
A0A0G2K645	Protein wntless homolog OS=Rattus norvegicus OX=10116 GN=Wls PE=1 SV=1	Wls	1.51	0.00218037	Up	60.265	11.1	5	5	1.08769	1.12854	0.97572	1.05431	1.28586	1.15388	0.75767	0.770888	0.785454	plasma membrane				GO:0001704 formation of primary germ layer; GO:0001707 mesoderm formation; GO:0002790 peptide secretion; GO:0002791 regulation of peptide secretion; GO:0002793 positive regulation of peptide secretion; GO:0003002 regionalization; GO:0006810 transport; GO:0006886 intracellular protein transport; GO:0007154 cell communication; GO:0007165 signal transduction; GO:0007166 cell surface receptor signali…	GO:0000139 Golgi membrane; GO:0005576 extracellular region; GO:0005615 extracellular space; GO:0005622 intracellular; GO:0005623 cell; GO:0005737 cytoplasm; GO:0005768 endosome; GO:0005769 early endosome; GO:0005783 endoplasmic reticulum; GO:0005789 endoplasmic reticulum membrane; GO:0005794 Golgi apparatus; GO:0005802 trans-Golgi network; GO:0005886 plasma membrane; GO:0010008 endosome membrane;…	GO:0001664 G protein-coupled receptor binding; GO:0005102 signaling receptor binding; GO:0005488 binding; GO:0005515 protein binding; GO:0017147 Wnt-protein binding; GO:0031628 opioid receptor binding; GO:0031852 mu-type opioid receptor binding;
A0A0H2UHI5	Serine protease inhibitor A3N OS=Rattus norvegicus OX=10116 GN=Serpina3n PE=1 SV=1	Serpina3n	1.6301	1.59947e-06	Up	45.481	48.8	20	9	1.21722	1.19194	1.15949	1.12936	1.11971	1.11722	0.674636	0.699476	0.690942	endoplasmic reticulum	K04525			GO:0001775 cell activation; GO:0001894 tissue homeostasis; GO:0002237 response to molecule of bacterial origin; GO:0002252 immune effector process; GO:0002263 cell activation involved in immune response; GO:0002274 myeloid leukocyte activation; GO:0002275 myeloid cell activation involved in immune response; GO:0002283 neutrophil activation involved in immune response; GO:0002366 leukocyte activat…	GO:0000323 lytic vacuole; GO:0005576 extracellular region; GO:0005615 extracellular space; GO:0005622 intracellular; GO:0005623 cell; GO:0005634 nucleus; GO:0005737 cytoplasm; GO:0005764 lysosome; GO:0005766 primary lysosome; GO:0005773 vacuole; GO:0005775 vacuolar lumen; GO:0012505 endomembrane system; GO:0030141 secretory granule; GO:0031091 platelet alpha granule; GO:0031093 platelet alpha gra…	GO:0003676 nucleic acid binding; GO:0003677 DNA binding; GO:0004857 enzyme inhibitor activity; GO:0004866 endopeptidase inhibitor activity; GO:0004867 serine-type endopeptidase inhibitor activity; GO:0004869 cysteine-type endopeptidase inhibitor activity; GO:0005488 binding; GO:0030234 enzyme regulator activity; GO:0030414 peptidase inhibitor activity; GO:0061134 peptidase regulator activity; GO:…	PF00079	Serpin (serine protease inhibitor)	V	KOG2392	Serpin
A0A0G2K9Y7	Carboxylic ester hydrolase OS=Rattus norvegicus OX=10116 GN=LOC501233 PE=1 SV=1	LOC501233	2.003	0.00552658	Up	59.841	34.4	15	2	1.46471	1.4263	1.57521	0.950115	0.929815	1.14411	0.420452	0.476079	0.613204	cytoplasm					GO:0005622 intracellular; GO:0005623 cell; GO:0005737 cytoplasm; GO:0005783 endoplasmic reticulum; GO:0005788 endoplasmic reticulum lumen; GO:0012505 endomembrane system; GO:0031974 membrane-enclosed lumen; GO:0043226 organelle; GO:0043227 membrane-bounded organelle; GO:0043229 intracellular organelle; GO:0043231 intracellular membrane-bounded organelle; GO:0043233 organelle lumen; GO:0070013 int…	GO:0003824 catalytic activity; GO:0016289 CoA hydrolase activity; GO:0016290 palmitoyl-CoA hydrolase activity; GO:0016787 hydrolase activity; GO:0016788 hydrolase activity, acting on ester bonds; GO:0016790 thiolester hydrolase activity; GO:0047617 acyl-CoA hydrolase activity; GO:0052689 carboxylic ester hydrolase activity;	PF00135	Carboxylesterase family	I	KOG1516	Carboxylesterase and related proteins
A0A0H2UHF8	Alpha-1-acid glycoprotein OS=Rattus norvegicus OX=10116 GN=Orm1 PE=1 SV=1	Orm1	2.316	0.000972401	Up	26.711	33.2	8	8	1.51369	1.28593	1.34803	1.16505	0.948888	1.27509	0.471366	0.52734	0.464612	extracellular	K17308			GO:0001101 response to acid chemical; GO:0001775 cell activation; GO:0001817 regulation of cytokine production; GO:0001818 negative regulation of cytokine production; GO:0001819 positive regulation of cytokine production; GO:0002237 response to molecule of bacterial origin; GO:0002252 immune effector process; GO:0002263 cell activation involved in immune response; GO:0002274 myeloid leukocyte act…	GO:0000323 lytic vacuole; GO:0005576 extracellular region; GO:0005615 extracellular space; GO:0005622 intracellular; GO:0005623 cell; GO:0005737 cytoplasm; GO:0005764 lysosome; GO:0005766 primary lysosome; GO:0005773 vacuole; GO:0005775 vacuolar lumen; GO:0012505 endomembrane system; GO:0030141 secretory granule; GO:0031091 platelet alpha granule; GO:0031093 platelet alpha granule lumen; GO:00314…	GO:0005488 binding; GO:0008144 drug binding;	PF00061	Lipocalin / cytosolic fatty-acid binding protein family
A2VCW9	Alpha-aminoadipic semialdehyde synthase, mitochondrial OS=Rattus norvegicus OX=10116 GN=Aass PE=2 SV=1	Aass	0.6651	4.48389e-07	Down	102.91	44	32	32	1.01687	0.979636	0.989923	0.810934	0.797891	0.793176	1.20131	1.20676	1.20351	mitochondria	K14157	AASS; alpha-aminoadipic semialdehyde synthase [EC:1.5.1.8 1.5.1.9]	rno01100 Metabolic pathways; rno00310 Lysine degradation	GO:0006082 organic acid metabolic process; GO:0006091 generation of precursor metabolites and energy; GO:0006520 cellular amino acid metabolic process; GO:0006553 lysine metabolic process; GO:0006554 lysine catabolic process; GO:0006807 nitrogen compound metabolic process; GO:0008152 metabolic process; GO:0008652 cellular amino acid biosynthetic process; GO:0009056 catabolic process; GO:0009058 b…	GO:0005622 intracellular; GO:0005623 cell; GO:0005737 cytoplasm; GO:0005739 mitochondrion; GO:0005759 mitochondrial matrix; GO:0031974 membrane-enclosed lumen; GO:0043226 organelle; GO:0043227 membrane-bounded organelle; GO:0043229 intracellular organelle; GO:0043231 intracellular membrane-bounded organelle; GO:0043233 organelle lumen; GO:0070013 intracellular organelle lumen;	GO:0003824 catalytic activity; GO:0004753 saccharopine dehydrogenase activity; GO:0016491 oxidoreductase activity; GO:0016645 oxidoreductase activity, acting on the CH-NH group of donors; GO:0016646 oxidoreductase activity, acting on the CH-NH group of donors, NAD or NADP as acceptor; GO:0047130 saccharopine dehydrogenase (NADP+, L-lysine-forming) activity; GO:0047131 saccharopine dehydrogenase (…	PF05222	Alanine dehydrogenase/PNT, N-terminal domain	E	KOG0172	Lysine-ketoglutarate reductase/saccharopine dehydrogenase
B5DF07	Mitochondrial ribonuclease P catalytic subunit OS=Rattus norvegicus OX=10116 GN=Prorp PE=2 SV=1	Prorp	1.5852	0.0131044	Up	67.007	4.1	2	2	1.16152	1.11157	1.07417	1.19263	1.08353	0.999126	0.740885	0.636563		mitochondria	K17655			GO:0000959 mitochondrial RNA metabolic process; GO:0000963 mitochondrial RNA processing; GO:0000964 mitochondrial RNA 5'-end processing; GO:0000966 RNA 5'-end processing; GO:0001682 tRNA 5'-leader removal; GO:0006139 nucleobase-containing compound metabolic process; GO:0006396 RNA processing; GO:0006399 tRNA metabolic process; GO:0006725 cellular aromatic compound metabolic process; GO:0006807 ni…	GO:0005622 intracellular; GO:0005623 cell; GO:0005634 nucleus; GO:0005737 cytoplasm; GO:0005739 mitochondrion; GO:0005759 mitochondrial matrix; GO:0009295 nucleoid; GO:0030677 ribonuclease P complex; GO:0030678 mitochondrial ribonuclease P complex; GO:0031974 membrane-enclosed lumen; GO:0032991 protein-containing complex; GO:0042645 mitochondrial nucleoid; GO:0043226 organelle; GO:0043227 membran…	GO:0003824 catalytic activity; GO:0004518 nuclease activity; GO:0004519 endonuclease activity; GO:0004521 endoribonuclease activity; GO:0004526 ribonuclease P activity; GO:0004540 ribonuclease activity; GO:0004549 tRNA-specific ribonuclease activity; GO:0016787 hydrolase activity; GO:0016788 hydrolase activity, acting on ester bonds; GO:0016891 endoribonuclease activity, producing 5'-phosphomonoe…
D3ZFS7	Lysophospholipase-like 1 OS=Rattus norvegicus OX=10116 GN=Lyplal1 PE=3 SV=2	Lyplal1	0.4684	0.000169712	Down	26.069	64.3	9	9	1.65426	1.66061	1.61897	0.458824	0.446611	0.391599	0.966181	0.879693	0.923245	mitochondria	K06999			GO:0002084 protein depalmitoylation; GO:0006464 cellular protein modification process; GO:0006807 nitrogen compound metabolic process; GO:0008152 metabolic process; GO:0009056 catabolic process; GO:0009057 macromolecule catabolic process; GO:0009987 cellular process; GO:0019538 protein metabolic process; GO:0030163 protein catabolic process; GO:0032879 regulation of localization; GO:0032880 regul…	GO:0005622 intracellular; GO:0005623 cell; GO:0005737 cytoplasm; GO:0005829 cytosol;	GO:0003824 catalytic activity; GO:0004620 phospholipase activity; GO:0004622 lysophospholipase activity; GO:0008474 palmitoyl-(protein) hydrolase activity; GO:0016298 lipase activity; GO:0016787 hydrolase activity; GO:0016788 hydrolase activity, acting on ester bonds; GO:0016790 thiolester hydrolase activity; GO:0052689 carboxylic ester hydrolase activity; GO:0098599 palmitoyl hydrolase activity;…	PF02230	Phospholipase/Carboxylesterase	I	KOG2112	Lysophospholipase
D3ZHD1	Annexin OS=Rattus norvegicus OX=10116 GN=Anxa13 PE=1 SV=1	Anxa13	1.5361	0.000757114	Up	36.128	35.4	9	8	1.05238	1.12575	1.0256	1.18573	1.10631	1.2187	0.70955	0.773805	0.802174	cytoplasm	K17099			GO:0009987 cellular process; GO:0030154 cell differentiation; GO:0032502 developmental process; GO:0032879 regulation of localization; GO:0032880 regulation of protein localization; GO:0042996 regulation of Golgi to plasma membrane protein transport; GO:0042997 negative regulation of Golgi to plasma membrane protein transport; GO:0042998 positive regulation of Golgi to plasma membrane protein tra…	GO:0005622 intracellular; GO:0005623 cell; GO:0005634 nucleus; GO:0005654 nucleoplasm; GO:0005737 cytoplasm; GO:0005886 plasma membrane; GO:0012505 endomembrane system; GO:0016020 membrane; GO:0016323 basolateral plasma membrane; GO:0016324 apical plasma membrane; GO:0030133 transport vesicle; GO:0031410 cytoplasmic vesicle; GO:0031974 membrane-enclosed lumen; GO:0031981 nuclear lumen; GO:0031982…	GO:0001786 phosphatidylserine binding; GO:0005488 binding; GO:0005543 phospholipid binding; GO:0008289 lipid binding; GO:0043167 ion binding; GO:0043168 anion binding; GO:0072341 modified amino acid binding; GO:1901611 phosphatidylglycerol binding;			U	KOG0819	Annexin
D4A5T8	Periplakin OS=Rattus norvegicus OX=10116 GN=Ppl PE=1 SV=1	Ppl	1.5859	7.01871e-05	Up	204.14	31.9	44	43	1.19331	1.17999	1.21006	1.05487	1.10859	1.15847	0.699654	0.697943	0.697114	nucleus	K10386			GO:0006996 organelle organization; GO:0007010 cytoskeleton organization; GO:0007275 multicellular organism development; GO:0008219 cell death; GO:0008544 epidermis development; GO:0009605 response to external stimulus; GO:0009612 response to mechanical stimulus; GO:0009628 response to abiotic stimulus; GO:0009888 tissue development; GO:0009913 epidermal cell differentiation; GO:0009987 cellular p…	GO:0001533 cornified envelope; GO:0005622 intracellular; GO:0005623 cell; GO:0005634 nucleus; GO:0005737 cytoplasm; GO:0005739 mitochondrion; GO:0005829 cytosol; GO:0005856 cytoskeleton; GO:0005886 plasma membrane; GO:0005911 cell-cell junction; GO:0016020 membrane; GO:0019897 extrinsic component of plasma membrane; GO:0019898 extrinsic component of membrane; GO:0030054 cell junction; GO:0030057 …	GO:0005198 structural molecule activity; GO:0005200 structural constituent of cytoskeleton;			Z	KOG0516	Dystonin, GAS (Growth-arrest-specific protein), and related proteins
D4A777	Family with sequence similarity 114, member A1 OS=Rattus norvegicus OX=10116 GN=Fam114a1 PE=1 SV=2	Fam114a1	2.3555	0.017271	Up	60.757	4.8	2	2	1.43694	1.43067	0.706381	1.11787	0.95199	1.37981	0.561364		0.414976	nucleus					GO:0005622 intracellular; GO:0005623 cell; GO:0005634 nucleus; GO:0005654 nucleoplasm; GO:0005737 cytoplasm; GO:0005794 Golgi apparatus; GO:0005829 cytosol; GO:0012505 endomembrane system; GO:0031974 membrane-enclosed lumen; GO:0031981 nuclear lumen; GO:0043226 organelle; GO:0043227 membrane-bounded organelle; GO:0043229 intracellular organelle; GO:0043231 intracellular membrane-bounded organelle…
F1LMK6	L-serine ammonia-lyase OS=Rattus norvegicus OX=10116 GN=Sds PE=1 SV=2	Sds	1.8102	0.00211609	Up	38.276	26.5	6	6	1.21264	1.28925	1.28797	1.16441	1.08631	1.10543	0.665384	0.667778	0.520833	plasma membrane	K17989	SDS; L-serine/L-threonine ammonia-lyase [EC:4.3.1.17 4.3.1.19]	rno01100 Metabolic pathways; rno00270 Cysteine and methionine metabolism; rno00260 Glycine, serine and threonine metabolism; rno01200 Carbon metabolism; rno00290 Valine, leucine and isoleucine biosynthesis; rno01230 Biosynthesis of amino acids	GO:0001101 response to acid chemical; GO:0001505 regulation of neurotransmitter levels; GO:0005975 carbohydrate metabolic process; GO:0005996 monosaccharide metabolic process; GO:0006006 glucose metabolic process; GO:0006082 organic acid metabolic process; GO:0006090 pyruvate metabolic process; GO:0006094 gluconeogenesis; GO:0006520 cellular amino acid metabolic process; GO:0006544 glycine metabo…	GO:0005622 intracellular; GO:0005623 cell; GO:0005737 cytoplasm; GO:0005739 mitochondrion; GO:0005829 cytosol; GO:0043226 organelle; GO:0043227 membrane-bounded organelle; GO:0043229 intracellular organelle; GO:0043231 intracellular membrane-bounded organelle;	GO:0003824 catalytic activity; GO:0003941 L-serine ammonia-lyase activity; GO:0005488 binding; GO:0005515 protein binding; GO:0008144 drug binding; GO:0016829 lyase activity; GO:0016835 carbon-oxygen lyase activity; GO:0016836 hydro-lyase activity; GO:0016840 carbon-nitrogen lyase activity; GO:0016841 ammonia-lyase activity; GO:0019842 vitamin binding; GO:0030170 pyridoxal phosphate binding; GO:0…			E	KOG1250	Threonine/serine dehydratases
F1LR92	Serine protease inhibitor A3M OS=Rattus norvegicus OX=10116 GN=Serpina3m PE=1 SV=3	Serpina3m	1.691	0.000224097	Up	46.84	33.7	12	10	1.2903	1.19583	1.34295	1.02535	1.13689	1.08711	0.670072	0.60698	0.644506	endoplasmic reticulum	K04525			GO:0001775 cell activation; GO:0001894 tissue homeostasis; GO:0002237 response to molecule of bacterial origin; GO:0002252 immune effector process; GO:0002263 cell activation involved in immune response; GO:0002274 myeloid leukocyte activation; GO:0002275 myeloid cell activation involved in immune response; GO:0002283 neutrophil activation involved in immune response; GO:0002366 leukocyte activat…	GO:0000323 lytic vacuole; GO:0005576 extracellular region; GO:0005615 extracellular space; GO:0005622 intracellular; GO:0005623 cell; GO:0005634 nucleus; GO:0005737 cytoplasm; GO:0005764 lysosome; GO:0005766 primary lysosome; GO:0005773 vacuole; GO:0005775 vacuolar lumen; GO:0012505 endomembrane system; GO:0030141 secretory granule; GO:0031091 platelet alpha granule; GO:0031093 platelet alpha gra…	GO:0003676 nucleic acid binding; GO:0003677 DNA binding; GO:0004857 enzyme inhibitor activity; GO:0004866 endopeptidase inhibitor activity; GO:0004867 serine-type endopeptidase inhibitor activity; GO:0004869 cysteine-type endopeptidase inhibitor activity; GO:0005488 binding; GO:0030234 enzyme regulator activity; GO:0030414 peptidase inhibitor activity; GO:0061134 peptidase regulator activity; GO:…	PF00079	Serpin (serine protease inhibitor)	V	KOG2392	Serpin
Q6IRI9	Dimethylaniline monooxygenase [N-oxide-forming] 2 OS=Rattus norvegicus OX=10116 GN=Fmo2 PE=2 SV=3	Fmo2	0.6462	0.000804285	Down	60.898	18.7	8	8	1.06423	0.993467	1.12906	0.830196	0.704987	0.746715	1.18951	1.17035	1.17149	peroxisome	K00485	FMO; dimethylaniline monooxygenase (N-oxide forming) [EC:1.14.13.8]	rno00982 Drug metabolism - cytochrome P450	GO:0006082 organic acid metabolic process; GO:0006139 nucleobase-containing compound metabolic process; GO:0006725 cellular aromatic compound metabolic process; GO:0006732 coenzyme metabolic process; GO:0006733 oxidoreduction coenzyme metabolic process; GO:0006739 NADP metabolic process; GO:0006753 nucleoside phosphate metabolic process; GO:0006793 phosphorus metabolic process; GO:0006796 phospha…	GO:0005622 intracellular; GO:0005623 cell; GO:0005737 cytoplasm; GO:0005783 endoplasmic reticulum; GO:0005789 endoplasmic reticulum membrane; GO:0012505 endomembrane system; GO:0016020 membrane; GO:0031984 organelle subcompartment; GO:0042175 nuclear outer membrane-endoplasmic reticulum membrane network; GO:0043226 organelle; GO:0043227 membrane-bounded organelle; GO:0043229 intracellular organel…	GO:0003824 catalytic activity; GO:0004497 monooxygenase activity; GO:0004499 N,N-dimethylaniline monooxygenase activity; GO:0016491 oxidoreductase activity; GO:0016705 oxidoreductase activity, acting on paired donors, with incorporation or reduction of molecular oxygen; GO:0016709 oxidoreductase activity, acting on paired donors, with incorporation or reduction of molecular oxygen, NAD(P)H as one…			Q	KOG1399	Flavin-containing monooxygenase
G3V786	Aldo-keto reductase family 1, member B8 OS=Rattus norvegicus OX=10116 GN=Akr1b8 PE=1 SV=1	Akr1b8	2.532	0.0040389	Up	36.16	51.3	14	2	1.12194	1.70944	1.12915	0.986883	1.5856	1.0402	0.495297	0.450209	0.481294	cytoplasm	K00011	AKR1B; aldehyde reductase [EC:1.1.1.21]	rno01100 Metabolic pathways; rno00561 Glycerolipid metabolism; rno00052 Galactose metabolism; rno00040 Pentose and glucuronate interconversions; rno00051 Fructose and mannose metabolism; rno00790 Folate biosynthesis	GO:0001523 retinoid metabolic process; GO:0006066 alcohol metabolic process; GO:0006629 lipid metabolic process; GO:0006694 steroid biosynthetic process; GO:0006703 estrogen biosynthetic process; GO:0006714 sesquiterpenoid metabolic process; GO:0006720 isoprenoid metabolic process; GO:0006721 terpenoid metabolic process; GO:0006725 cellular aromatic compound metabolic process; GO:0006807 nitrogen…	GO:0005622 intracellular; GO:0005623 cell; GO:0005737 cytoplasm; GO:0005739 mitochondrion; GO:0005759 mitochondrial matrix; GO:0005829 cytosol; GO:0031974 membrane-enclosed lumen; GO:0043226 organelle; GO:0043227 membrane-bounded organelle; GO:0043229 intracellular organelle; GO:0043231 intracellular membrane-bounded organelle; GO:0043233 organelle lumen; GO:0070013 intracellular organelle lumen;	GO:0001758 retinal dehydrogenase activity; GO:0003824 catalytic activity; GO:0004032 alditol:NADP+ 1-oxidoreductase activity; GO:0004033 aldo-keto reductase (NADP) activity; GO:0004303 estradiol 17-beta-dehydrogenase activity; GO:0008106 alcohol dehydrogenase (NADP+) activity; GO:0016229 steroid dehydrogenase activity; GO:0016491 oxidoreductase activity; GO:0016614 oxidoreductase activity, acting…	PF00248	Aldo/keto reductase family	S	KOG1577	Aldo/keto reductase family proteins
G3V9M6	Fibrillin 1 OS=Rattus norvegicus OX=10116 GN=Fbn1 PE=1 SV=1	Fbn1	1.6598	0.0205157	Up	311.95	18.8	36	35	0.730346	1.1426	1.06072	0.990391	1.27326	1.52191	0.779113	0.807601	0.694057	nucleus	K06825	FBN1; fibrillin 1	rno04350 TGF-beta signaling pathway	GO:0001501 skeletal system development; GO:0001654 eye development; GO:0001655 urogenital system development; GO:0001656 metanephros development; GO:0001822 kidney development; GO:0001932 regulation of protein phosphorylation; GO:0001934 positive regulation of protein phosphorylation; GO:0002682 regulation of immune system process; GO:0002683 negative regulation of immune system process; GO:00027…	GO:0001527 microfibril; GO:0005576 extracellular region; GO:0005604 basement membrane; GO:0005615 extracellular space; GO:0005622 intracellular; GO:0005623 cell; GO:0005737 cytoplasm; GO:0005783 endoplasmic reticulum; GO:0005788 endoplasmic reticulum lumen; GO:0012505 endomembrane system; GO:0031012 extracellular matrix; GO:0031974 membrane-enclosed lumen; GO:0043226 organelle; GO:0043227 membran…	GO:0005102 signaling receptor binding; GO:0005178 integrin binding; GO:0005179 hormone activity; GO:0005198 structural molecule activity; GO:0005201 extracellular matrix structural constituent; GO:0005488 binding; GO:0005509 calcium ion binding; GO:0005515 protein binding; GO:0005539 glycosaminoglycan binding; GO:0008201 heparin binding; GO:0030023 extracellular matrix constituent conferring elas…	PF07645; PF12662	Calcium-binding EGF domain; Complement Clr-like EGF-like	T	KOG1217	Fibrillins and related proteins containing Ca2+-binding EGF-like domains
P01015	Angiotensinogen OS=Rattus norvegicus OX=10116 GN=Agt PE=1 SV=1	Agt	1.6132	0.000396921	Up	51.981	34.6	13	13	1.05565	0.951817	1.01036	1.25985	1.24218	1.1909	0.79508	0.791493	0.702669	extracellular	K09821	AGT; angiotensinogen	rno05200 Pathways in cancer; rno04924 Renin secretion; rno04614 Renin-angiotensin system; rno04931 Insulin resistance; rno04933 AGE-RAGE signaling pathway in diabetic complications; rno04925 Aldosterone synthesis and secretion; rno04927 Cortisol synthesis and secretion; rno04270 Vascular smooth muscle contraction; rno05414 Dilated cardiomyopathy; rno05410 Hypertrophic cardiomyopathy; rno04080 Neu…	GO:0000003 reproduction; GO:0000165 MAPK cascade; GO:0001505 regulation of neurotransmitter levels; GO:0001542 ovulation from ovarian follicle; GO:0001543 ovarian follicle rupture; GO:0001558 regulation of cell growth; GO:0001568 blood vessel development; GO:0001655 urogenital system development; GO:0001657 ureteric bud development; GO:0001658 branching involved in ureteric bud morphogenesis; GO:…	GO:0005576 extracellular region; GO:0005615 extracellular space; GO:0005622 intracellular; GO:0005623 cell; GO:0005737 cytoplasm; GO:0005829 cytosol;	GO:0001664 G protein-coupled receptor binding; GO:0004857 enzyme inhibitor activity; GO:0004866 endopeptidase inhibitor activity; GO:0004867 serine-type endopeptidase inhibitor activity; GO:0005102 signaling receptor binding; GO:0005179 hormone activity; GO:0005488 binding; GO:0005515 protein binding; GO:0008047 enzyme activator activity; GO:0008083 growth factor activity; GO:0016176 superoxide-g…	PF00079	Serpin (serine protease inhibitor)	V	KOG2392	Serpin
P02454	Collagen alpha-1(I) chain OS=Rattus norvegicus OX=10116 GN=Col1a1 PE=1 SV=5	Col1a1	1.6127	0.0372423	Up	137.95	6.4	8	7	0.730312	1.21052	1.07011	0.991998	1.12972	1.57504	0.709967	0.859315	0.723028	extracellular	K06236	COL1A; collagen type I alpha	rno04512 ECM-receptor interaction; rno04933 AGE-RAGE signaling pathway in diabetic complications; rno04510 Focal adhesion; rno04974 Protein digestion and absorption; rno05146 Amoebiasis; rno04926 Relaxin signaling pathway; rno04151 PI3K-Akt signaling pathway; rno05205 Proteoglycans in cancer; rno05165 Human papillomavirus infection; rno04611 Platelet activation	GO:0000302 response to reactive oxygen species; GO:0001101 response to acid chemical; GO:0001501 skeletal system development; GO:0001503 ossification; GO:0001568 blood vessel development; GO:0001649 osteoblast differentiation; GO:0001775 cell activation; GO:0001944 vasculature development; GO:0001957 intramembranous ossification; GO:0001958 endochondral ossification; GO:0002376 immune system proc…	GO:0005576 extracellular region; GO:0005581 collagen trimer; GO:0005583 fibrillar collagen trimer; GO:0005584 collagen type I trimer; GO:0005615 extracellular space; GO:0005622 intracellular; GO:0005623 cell; GO:0005737 cytoplasm; GO:0005783 endoplasmic reticulum; GO:0005788 endoplasmic reticulum lumen; GO:0005794 Golgi apparatus; GO:0012505 endomembrane system; GO:0030141 secretory granule; GO:0…	GO:0002020 protease binding; GO:0005198 structural molecule activity; GO:0005201 extracellular matrix structural constituent; GO:0005488 binding; GO:0005515 protein binding; GO:0019838 growth factor binding; GO:0019899 enzyme binding; GO:0042802 identical protein binding; GO:0048407 platelet-derived growth factor binding;			W	KOG3544	Collagens (type IV and type XIII), and related proteins
P02625	Parvalbumin alpha OS=Rattus norvegicus OX=10116 GN=Pvalb PE=1 SV=2	Pvalb	0.4553	0.00148368	Down	11.925	50	6	5		0.164573	0.247688	0.711885	0.730397	0.931687	1.70387	1.58989	1.92	cytoplasm	K23926			GO:0006873 cellular ion homeostasis; GO:0006874 cellular calcium ion homeostasis; GO:0006875 cellular metal ion homeostasis; GO:0009987 cellular process; GO:0019725 cellular homeostasis; GO:0030003 cellular cation homeostasis; GO:0042592 homeostatic process; GO:0048878 chemical homeostasis; GO:0050801 ion homeostasis; GO:0051480 regulation of cytosolic calcium ion concentration; GO:0055065 metal …	GO:0005622 intracellular; GO:0005623 cell; GO:0005634 nucleus; GO:0005737 cytoplasm; GO:0030424 axon; GO:0032991 protein-containing complex; GO:0036477 somatodendritic compartment; GO:0042995 cell projection; GO:0043005 neuron projection; GO:0043025 neuronal cell body; GO:0043195 terminal bouton; GO:0043226 organelle; GO:0043227 membrane-bounded organelle; GO:0043229 intracellular organelle; GO:0…	GO:0005488 binding; GO:0005509 calcium ion binding; GO:0005515 protein binding; GO:0042802 identical protein binding; GO:0042803 protein homodimerization activity; GO:0043167 ion binding; GO:0043169 cation binding; GO:0046872 metal ion binding; GO:0046982 protein heterodimerization activity; GO:0046983 protein dimerization activity;	PF13499	EF-hand domain pair	T	KOG0027	Calmodulin and related proteins (EF-Hand superfamily)
P02651	Apolipoprotein A-IV OS=Rattus norvegicus OX=10116 GN=Apoa4 PE=1 SV=2	Apoa4	0.5256	0.000154162	Down	44.456	47.8	15	15	0.583857	0.54885	0.547679	0.787198	0.864763	0.86981	1.68479	1.60908	1.50398	extracellular	K08760	APOA4; apolipoprotein A-IV	rno04977 Vitamin digestion and absorption; rno04979 Cholesterol metabolism; rno04975 Fat digestion and absorption	GO:0000302 response to reactive oxygen species; GO:0000303 response to superoxide; GO:0000305 response to oxygen radical; GO:0001523 retinoid metabolic process; GO:0002227 innate immune response in mucosa; GO:0002251 organ or tissue specific immune response; GO:0002376 immune system process; GO:0002385 mucosal immune response; GO:0006066 alcohol metabolic process; GO:0006629 lipid metabolic proce…	GO:0005576 extracellular region; GO:0005615 extracellular space; GO:0005622 intracellular; GO:0005623 cell; GO:0005737 cytoplasm; GO:0005768 endosome; GO:0005769 early endosome; GO:0005783 endoplasmic reticulum; GO:0005788 endoplasmic reticulum lumen; GO:0005829 cytosol; GO:0012505 endomembrane system; GO:0031410 cytoplasmic vesicle; GO:0031974 membrane-enclosed lumen; GO:0031982 vesicle; GO:0032…	GO:0005102 signaling receptor binding; GO:0005215 transporter activity; GO:0005319 lipid transporter activity; GO:0005488 binding; GO:0005496 steroid binding; GO:0005507 copper ion binding; GO:0005515 protein binding; GO:0005543 phospholipid binding; GO:0008047 enzyme activator activity; GO:0008289 lipid binding; GO:0015248 sterol transporter activity; GO:0015485 cholesterol binding; GO:0016209 a…	PF01442	Apolipoprotein A1/A4/E domain
P02761	Major urinary protein OS=Rattus norvegicus OX=10116 PE=1 SV=1	--	0.6664	0.000706561	Down	20.737	78.5	23	3	1.05902	1.03941	1.0817	0.788882	0.767222	0.771313	1.26063	1.13609	1.09572	extracellular				GO:0001659 temperature homeostasis; GO:0002791 regulation of peptide secretion; GO:0002792 negative regulation of peptide secretion; GO:0003008 system process; GO:0006091 generation of precursor metabolites and energy; GO:0006109 regulation of carbohydrate metabolic process; GO:0006111 regulation of gluconeogenesis; GO:0006112 energy reserve metabolic process; GO:0006355 regulation of transcripti…	GO:0005576 extracellular region; GO:0005615 extracellular space; GO:0005622 intracellular; GO:0005623 cell; GO:0005634 nucleus; GO:0005737 cytoplasm; GO:0005829 cytosol; GO:0043226 organelle; GO:0043227 membrane-bounded organelle; GO:0043229 intracellular organelle; GO:0043231 intracellular membrane-bounded organelle;	GO:0000772 mating pheromone activity; GO:0003824 catalytic activity; GO:0004672 protein kinase activity; GO:0004713 protein tyrosine kinase activity; GO:0004714 transmembrane receptor protein tyrosine kinase activity; GO:0004888 transmembrane signaling receptor activity; GO:0005009 insulin-activated receptor activity; GO:0005102 signaling receptor binding; GO:0005186 pheromone activity; GO:000548…	PF00061	Lipocalin / cytosolic fatty-acid binding protein family
P02793	Ferritin light chain 1 OS=Rattus norvegicus OX=10116 GN=Ftl1 PE=1 SV=3	Ftl1	0.593	1.17863e-05	Down	20.748	71	11	11	1.00207	0.935479	0.900739	0.744745	0.793392	0.75555	1.29122	1.27897	1.29784	cytoplasm	K13625	FTL; ferritin light chain	rno04216 Ferroptosis; rno04978 Mineral absorption; rno04217 Necroptosis	GO:0006873 cellular ion homeostasis; GO:0006875 cellular metal ion homeostasis; GO:0006879 cellular iron ion homeostasis; GO:0006880 intracellular sequestering of iron ion; GO:0009987 cellular process; GO:0010035 response to inorganic substance; GO:0010038 response to metal ion; GO:0010288 response to lead ion; GO:0019725 cellular homeostasis; GO:0030003 cellular cation homeostasis; GO:0042221 re…	GO:0000323 lytic vacuole; GO:0005576 extracellular region; GO:0005622 intracellular; GO:0005623 cell; GO:0005737 cytoplasm; GO:0005764 lysosome; GO:0005767 secondary lysosome; GO:0005773 vacuole; GO:0005776 autophagosome; GO:0008043 intracellular ferritin complex; GO:0030139 endocytic vesicle; GO:0031410 cytoplasmic vesicle; GO:0031974 membrane-enclosed lumen; GO:0031982 vesicle; GO:0031983 vesic…	GO:0005488 binding; GO:0005506 iron ion binding; GO:0005515 protein binding; GO:0042802 identical protein binding; GO:0043167 ion binding; GO:0043169 cation binding; GO:0046872 metal ion binding; GO:0046914 transition metal ion binding;	PF00210	Ferritin-like domain	P	KOG2332	Ferritin
P02803	Metallothionein-1 OS=Rattus norvegicus OX=10116 GN=Mt1 PE=1 SV=1	Mt1	0.3708	0.000661147	Down	6.0061	70.5	4	3	0.786967	0.933666	0.70372	0.539619	0.56953	0.669643	1.44348	1.86315	1.49022	extracellular	K14739	MT1_2; metallothionein 1/2	rno04978 Mineral absorption				PF00131	Metallothionein
P04638	Apolipoprotein A-II OS=Rattus norvegicus OX=10116 GN=Apoa2 PE=2 SV=1	Apoa2	0.5856	0.00240229	Down	11.439	17.6	2	2	0.655733	0.649588	0.588731		0.851143	0.863296	1.49456	1.55203	1.34492	extracellular	K08758	APOA2; apolipoprotein A-II	rno04979 Cholesterol metabolism; rno03320 PPAR signaling pathway	GO:0001523 retinoid metabolic process; GO:0001817 regulation of cytokine production; GO:0001818 negative regulation of cytokine production; GO:0001819 positive regulation of cytokine production; GO:0002526 acute inflammatory response; GO:0002682 regulation of immune system process; GO:0002683 negative regulation of immune system process; GO:0002697 regulation of immune effector process; GO:000269…	GO:0005576 extracellular region; GO:0005615 extracellular space; GO:0005622 intracellular; GO:0005623 cell; GO:0005737 cytoplasm; GO:0005768 endosome; GO:0005769 early endosome; GO:0005783 endoplasmic reticulum; GO:0005788 endoplasmic reticulum lumen; GO:0005829 cytosol; GO:0012505 endomembrane system; GO:0031410 cytoplasmic vesicle; GO:0031974 membrane-enclosed lumen; GO:0031982 vesicle; GO:0032…	GO:0004857 enzyme inhibitor activity; GO:0005102 signaling receptor binding; GO:0005215 transporter activity; GO:0005319 lipid transporter activity; GO:0005488 binding; GO:0005496 steroid binding; GO:0005515 protein binding; GO:0005543 phospholipid binding; GO:0008035 high-density lipoprotein particle binding; GO:0008047 enzyme activator activity; GO:0008289 lipid binding; GO:0015248 sterol trans…
P05942	Protein S100-A4 OS=Rattus norvegicus OX=10116 GN=S100a4 PE=2 SV=1	S100a4	1.7287	8.2438e-05	Up	11.776	52.5	7	7	1.40165	1.16292	1.30743	1.07716	1.05659	1.11496	0.642313	0.647044	0.589924	extracellular	K23761			GO:0001837 epithelial to mesenchymal transition; GO:0007275 multicellular organism development; GO:0009888 tissue development; GO:0009966 regulation of signal transduction; GO:0009967 positive regulation of signal transduction; GO:0009987 cellular process; GO:0010646 regulation of cell communication; GO:0010647 positive regulation of cell communication; GO:0023051 regulation of signaling; GO:0023…	GO:0005622 intracellular; GO:0005623 cell; GO:0005634 nucleus; GO:0005737 cytoplasm; GO:0042995 cell projection; GO:0043005 neuron projection; GO:0043226 organelle; GO:0043227 membrane-bounded organelle; GO:0043229 intracellular organelle; GO:0043231 intracellular membrane-bounded organelle; GO:0048471 perinuclear region of cytoplasm; GO:0120025 plasma membrane bounded cell projection;	GO:0003779 actin binding; GO:0005102 signaling receptor binding; GO:0005488 binding; GO:0005509 calcium ion binding; GO:0005515 protein binding; GO:0008092 cytoskeletal protein binding; GO:0042802 identical protein binding; GO:0042803 protein homodimerization activity; GO:0043167 ion binding; GO:0043169 cation binding; GO:0046872 metal ion binding; GO:0046982 protein heterodimerization activity; …	PF01023	S-100/ICaBP type calcium binding domain
P06238	Alpha-2-macroglobulin OS=Rattus norvegicus OX=10116 GN=A2m PE=2 SV=2	A2m	4.0206	8.3365e-08	Up	163.78	46	52	49	1.27232	1.2322	1.2079	1.38518	1.42796	1.42126	0.358328	0.343993	0.350854	extracellular	K03910	A2M; alpha-2-macroglobulin	rno04610 Complement and coagulation cascades	GO:0000003 reproduction; GO:0001101 response to acid chemical; GO:0001553 luteinization; GO:0001868 regulation of complement activation, lectin pathway; GO:0001869 negative regulation of complement activation, lectin pathway; GO:0002376 immune system process; GO:0002437 inflammatory response to antigenic stimulus; GO:0002438 acute inflammatory response to antigenic stimulus; GO:0002526 acute infl…	GO:0005576 extracellular region; GO:0005615 extracellular space; GO:0005622 intracellular; GO:0005623 cell; GO:0005737 cytoplasm; GO:0005829 cytosol; GO:0012505 endomembrane system; GO:0030141 secretory granule; GO:0031091 platelet alpha granule; GO:0031093 platelet alpha granule lumen; GO:0031410 cytoplasmic vesicle; GO:0031974 membrane-enclosed lumen; GO:0031982 vesicle; GO:0031983 vesicle lume…	GO:0002020 protease binding; GO:0004857 enzyme inhibitor activity; GO:0004866 endopeptidase inhibitor activity; GO:0004867 serine-type endopeptidase inhibitor activity; GO:0005096 GTPase activator activity; GO:0005102 signaling receptor binding; GO:0005488 binding; GO:0005515 protein binding; GO:0008047 enzyme activator activity; GO:0019838 growth factor binding; GO:0019899 enzyme binding; GO:001…	PF01835; PF07703; PF07678; PF07677	MG2 domain; Alpha-2-macroglobulin family N-terminal region; A-macroglobulin complement component; A-macroglobulin receptor	O	KOG1366	Alpha-macroglobulin
P06762	Heme oxygenase 1 OS=Rattus norvegicus OX=10116 GN=Hmox1 PE=1 SV=1	Hmox1	0.231	7.66444e-06	Down	33.005	55.7	9	9	0.783188	0.561322	0.595237	0.427169	0.443373	0.454431	2.01699	1.97651	1.74178	peroxisome	K00510	HMOX1; heme oxygenase 1 [EC:1.14.14.18]	rno05200 Pathways in cancer; rno01100 Metabolic pathways; rno04978 Mineral absorption; rno05418 Fluid shear stress and atherosclerosis; rno05225 Hepatocellular carcinoma; rno00860 Porphyrin and chlorophyll metabolism; rno05206 MicroRNAs in cancer; rno04216 Ferroptosis; rno04066 HIF-1 signaling pathway	GO:0000302 response to reactive oxygen species; GO:0001525 angiogenesis; GO:0001568 blood vessel development; GO:0001666 response to hypoxia; GO:0001817 regulation of cytokine production; GO:0001818 negative regulation of cytokine production; GO:0001889 liver development; GO:0001936 regulation of endothelial cell proliferation; GO:0001938 positive regulation of endothelial cell proliferation; GO:…	GO:0005622 intracellular; GO:0005623 cell; GO:0005634 nucleus; GO:0005730 nucleolus; GO:0005737 cytoplasm; GO:0005783 endoplasmic reticulum; GO:0005829 cytosol; GO:0005886 plasma membrane; GO:0005901 caveola; GO:0012505 endomembrane system; GO:0016020 membrane; GO:0031974 membrane-enclosed lumen; GO:0031981 nuclear lumen; GO:0043226 organelle; GO:0043227 membrane-bounded organelle; GO:0043228 non…	GO:0003824 catalytic activity; GO:0004392 heme oxygenase (decyclizing) activity; GO:0004620 phospholipase activity; GO:0004630 phospholipase D activity; GO:0005488 binding; GO:0005515 protein binding; GO:0008081 phosphoric diester hydrolase activity; GO:0016298 lipase activity; GO:0016491 oxidoreductase activity; GO:0016705 oxidoreductase activity, acting on paired donors, with incorporation or r…	PF01126	Heme oxygenase	P	KOG4480	Heme oxygenase
P07943	Aldo-keto reductase family 1 member B1 OS=Rattus norvegicus OX=10116 GN=Akr1b1 PE=1 SV=3	Akr1b1	1.5993	6.56273e-06	Up	35.797	64.2	22	20	1.42978	1.25782	1.37552	0.992008	1.0235	1.02206	0.620387	0.645103	0.633828	cytoplasm	K00011	AKR1B; aldehyde reductase [EC:1.1.1.21]	rno01100 Metabolic pathways; rno00561 Glycerolipid metabolism; rno00052 Galactose metabolism; rno00040 Pentose and glucuronate interconversions; rno00051 Fructose and mannose metabolism; rno00790 Folate biosynthesis	GO:0000003 reproduction; GO:0000302 response to reactive oxygen species; GO:0001101 response to acid chemical; GO:0001655 urogenital system development; GO:0001822 kidney development; GO:0001894 tissue homeostasis; GO:0003008 system process; GO:0003014 renal system process; GO:0003091 renal water homeostasis; GO:0005975 carbohydrate metabolic process; GO:0005996 monosaccharide metabolic process; …	GO:0000323 lytic vacuole; GO:0005576 extracellular region; GO:0005615 extracellular space; GO:0005622 intracellular; GO:0005623 cell; GO:0005634 nucleus; GO:0005654 nucleoplasm; GO:0005737 cytoplasm; GO:0005764 lysosome; GO:0005773 vacuole; GO:0005829 cytosol; GO:0005902 microvillus; GO:0005911 cell-cell junction; GO:0030054 cell junction; GO:0031974 membrane-enclosed lumen; GO:0031981 nuclear lu…	GO:0003824 catalytic activity; GO:0004032 alditol:NADP+ 1-oxidoreductase activity; GO:0004033 aldo-keto reductase (NADP) activity; GO:0008106 alcohol dehydrogenase (NADP+) activity; GO:0009055 electron transfer activity; GO:0016491 oxidoreductase activity; GO:0016614 oxidoreductase activity, acting on CH-OH group of donors; GO:0016616 oxidoreductase activity, acting on the CH-OH group of donors, …	PF00248	Aldo/keto reductase family	S	KOG1577	Aldo/keto reductase family proteins
P30152	Neutrophil gelatinase-associated lipocalin OS=Rattus norvegicus OX=10116 GN=Lcn2 PE=1 SV=2	Lcn2	5.6569	1.12938e-05	Up	22.475	19.2	3	3	1.4183	1.26164	1.28681	1.43959	1.57009	1.26747	0.260155	0.248132	0.247812	extracellular	K21129	LCN2; lipocalin 2	rno04657 IL-17 signaling pathway	GO:0000302 response to reactive oxygen species; GO:0001775 cell activation; GO:0002237 response to molecule of bacterial origin; GO:0002252 immune effector process; GO:0002263 cell activation involved in immune response; GO:0002274 myeloid leukocyte activation; GO:0002275 myeloid cell activation involved in immune response; GO:0002283 neutrophil activation involved in immune response; GO:0002366 …	GO:0005576 extracellular region; GO:0005615 extracellular space; GO:0005622 intracellular; GO:0005623 cell; GO:0005737 cytoplasm; GO:0005829 cytosol; GO:0012505 endomembrane system; GO:0030141 secretory granule; GO:0031410 cytoplasmic vesicle; GO:0031974 membrane-enclosed lumen; GO:0031982 vesicle; GO:0031983 vesicle lumen; GO:0034774 secretory granule lumen; GO:0035580 specific granule lumen; GO…	GO:0002020 protease binding; GO:0005488 binding; GO:0005506 iron ion binding; GO:0005515 protein binding; GO:0019899 enzyme binding; GO:0042802 identical protein binding; GO:0042803 protein homodimerization activity; GO:0043167 ion binding; GO:0043169 cation binding; GO:0046872 metal ion binding; GO:0046914 transition metal ion binding; GO:0046983 protein dimerization activity;	PF00061	Lipocalin / cytosolic fatty-acid binding protein family
P34901	Syndecan-4 OS=Rattus norvegicus OX=10116 GN=Sdc4 PE=1 SV=1	Sdc4	1.5528	0.00257579	Up	21.962	37.6	5	5	0.981791	1.16992	1.15367	1.08136	1.10631	1.2762	0.767463	0.777667	0.68561	endoplasmic reticulum	K16338	SDC4; syndecan 4	rno05205 Proteoglycans in cancer; rno04512 ECM-receptor interaction; rno05418 Fluid shear stress and atherosclerosis; rno04514 Cell adhesion molecules	GO:0001523 retinoid metabolic process; GO:0001655 urogenital system development; GO:0001657 ureteric bud development; GO:0001822 kidney development; GO:0001823 mesonephros development; GO:0001838 embryonic epithelial tube formation; GO:0001841 neural tube formation; GO:0001843 neural tube closure; GO:0001932 regulation of protein phosphorylation; GO:0001934 positive regulation of protein phosphor…	GO:0000323 lytic vacuole; GO:0005576 extracellular region; GO:0005622 intracellular; GO:0005623 cell; GO:0005737 cytoplasm; GO:0005764 lysosome; GO:0005773 vacuole; GO:0005775 vacuolar lumen; GO:0005794 Golgi apparatus; GO:0005796 Golgi lumen; GO:0005886 plasma membrane; GO:0005887 integral component of plasma membrane; GO:0005912 adherens junction; GO:0005925 focal adhesion; GO:0009986 cell surf…	GO:0001968 fibronectin binding; GO:0005080 protein kinase C binding; GO:0005488 binding; GO:0005515 protein binding; GO:0019899 enzyme binding; GO:0019900 kinase binding; GO:0019901 protein kinase binding; GO:0038023 signaling receptor activity; GO:0042802 identical protein binding; GO:0060089 molecular transducer activity; GO:0070053 thrombospondin receptor activity;
Q66HN9	Chloride channel protein OS=Rattus norvegicus OX=10116 GN=Clcnka PE=2 SV=1	Clcnka	1.656	0.00166687	Up	75.515	12.4	7	4	1.13611	1.33636	1.1886	0.989451	1.1927	1.14665	0.714637	0.661178	0.634306	plasma membrane	K05017			GO:0001101 response to acid chemical; GO:0001655 urogenital system development; GO:0001822 kidney development; GO:0003008 system process; GO:0006810 transport; GO:0006811 ion transport; GO:0006820 anion transport; GO:0006821 chloride transport; GO:0006950 response to stress; GO:0007275 multicellular organism development; GO:0007588 excretion; GO:0007589 body fluid secretion; GO:0009268 response t…	GO:0005622 intracellular; GO:0005623 cell; GO:0005737 cytoplasm; GO:0005783 endoplasmic reticulum; GO:0005886 plasma membrane; GO:0005887 integral component of plasma membrane; GO:0012505 endomembrane system; GO:0016020 membrane; GO:0016021 integral component of membrane; GO:0016323 basolateral plasma membrane; GO:0016324 apical plasma membrane; GO:0031224 intrinsic component of membrane; GO:0031…	GO:0005215 transporter activity; GO:0005216 ion channel activity; GO:0005244 voltage-gated ion channel activity; GO:0005247 voltage-gated chloride channel activity; GO:0005253 anion channel activity; GO:0005254 chloride channel activity; GO:0005488 binding; GO:0005515 protein binding; GO:0008308 voltage-gated anion channel activity; GO:0008509 anion transmembrane transporter activity; GO:0015075 …	PF00571	CBS domain	P	KOG0476	Cl- channel CLC-2 and related proteins (CLC superfamily)
Q3MID7	Lipopolysaccharide-binding protein OS=Rattus norvegicus OX=10116 GN=Lbp PE=1 SV=1	Lbp	1.8805	4.66588e-05	Up	53.497	23.3	10	10	1.0906	1.24581	1.13519	1.18311	1.23257	1.19343	0.674545	0.639186	0.60555	extracellular	K05399	LBP; lipopolysaccharide-binding protein	rno04620 Toll-like receptor signaling pathway; rno04064 NF-kappa B signaling pathway; rno05152 Tuberculosis	GO:0001775 cell activation; GO:0001817 regulation of cytokine production; GO:0001818 negative regulation of cytokine production; GO:0001819 positive regulation of cytokine production; GO:0001889 liver development; GO:0002218 activation of innate immune response; GO:0002221 pattern recognition receptor signaling pathway; GO:0002224 toll-like receptor signaling pathway; GO:0002232 leukocyte chemota…	GO:0005576 extracellular region; GO:0005615 extracellular space; GO:0005623 cell; GO:0009986 cell surface;	GO:0001530 lipopolysaccharide binding; GO:0005102 signaling receptor binding; GO:0005488 binding; GO:0005515 protein binding; GO:0008289 lipid binding; GO:0033218 amide binding; GO:0042277 peptide binding; GO:0070891 lipoteichoic acid binding; GO:0071723 lipopeptide binding; GO:0097367 carbohydrate derivative binding;	PF02886	LBP / BPI / CETP family, C-terminal domain	V	KOG4160	BPI/LBP/CETP family protein
Q3T1J4	Polypeptide N-acetylgalactosaminyltransferase OS=Rattus norvegicus OX=10116 GN=Galnt3 PE=2 SV=1	Galnt3	0.6216	0.00206218	Down	73.003	7	3	3	0.628899	0.75686		0.794616		0.850333	1.39205	1.25175	1.32549	Golgi apparatus	K00710	GALNT; polypeptide N-acetylgalactosaminyltransferase [EC:2.4.1.41]	rno00514 Other types of O-glycan biosynthesis; rno01100 Metabolic pathways; rno00512 Mucin type O-glycan biosynthesis	GO:0005975 carbohydrate metabolic process; GO:0006464 cellular protein modification process; GO:0006486 protein glycosylation; GO:0006493 protein O-linked glycosylation; GO:0006807 nitrogen compound metabolic process; GO:0007154 cell communication; GO:0007165 signal transduction; GO:0007166 cell surface receptor signaling pathway; GO:0007167 enzyme linked receptor protein signaling pathway; GO:00…	GO:0000139 Golgi membrane; GO:0005622 intracellular; GO:0005623 cell; GO:0005737 cytoplasm; GO:0005794 Golgi apparatus; GO:0012505 endomembrane system; GO:0016020 membrane; GO:0016021 integral component of membrane; GO:0031090 organelle membrane; GO:0031224 intrinsic component of membrane; GO:0031984 organelle subcompartment; GO:0043226 organelle; GO:0043227 membrane-bounded organelle; GO:0043229…	GO:0003824 catalytic activity; GO:0004653 polypeptide N-acetylgalactosaminyltransferase activity; GO:0005488 binding; GO:0005509 calcium ion binding; GO:0008194 UDP-glycosyltransferase activity; GO:0008376 acetylgalactosaminyltransferase activity; GO:0016740 transferase activity; GO:0016757 transferase activity, transferring glycosyl groups; GO:0016758 transferase activity, transferring hexosyl g…	PF00652	Ricin-type beta-trefoil lectin domain	O	KOG3736	Polypeptide N-acetylgalactosaminyltransferase
Q5FVL0	V-type proton ATPase subunit d 2 OS=Rattus norvegicus OX=10116 GN=Atp6v0d2 PE=2 SV=1	Atp6v0d2	0.6254	0.0048291	Down	40.519	33.1	7	7	1.04788	0.92717	0.990073	0.847365	0.68483	0.789792	1.29077	1.31558	1.10654	cytoplasm	K02146	ATPeV0D; V-type H+-transporting ATPase subunit d	rno00190 Oxidative phosphorylation; rno01100 Metabolic pathways; rno04721 Synaptic vesicle cycle; rno05323 Rheumatoid arthritis; rno04966 Collecting duct acid secretion; rno04145 Phagosome; rno05152 Tuberculosis; rno04142 Lysosome; rno05203 Viral carcinogenesis; rno05165 Human papillomavirus infection	GO:0000041 transition metal ion transport; GO:0006810 transport; GO:0006811 ion transport; GO:0006812 cation transport; GO:0006826 iron ion transport; GO:0006873 cellular ion homeostasis; GO:0006885 regulation of pH; GO:0007034 vacuolar transport; GO:0007035 vacuolar acidification; GO:0007154 cell communication; GO:0007165 signal transduction; GO:0007166 cell surface receptor signaling pathway; G…	GO:0000323 lytic vacuole; GO:0005622 intracellular; GO:0005623 cell; GO:0005737 cytoplasm; GO:0005764 lysosome; GO:0005765 lysosomal membrane; GO:0005768 endosome; GO:0005769 early endosome; GO:0005773 vacuole; GO:0005774 vacuolar membrane; GO:0005886 plasma membrane; GO:0010008 endosome membrane; GO:0012505 endomembrane system; GO:0012506 vesicle membrane; GO:0016020 membrane; GO:0016324 apical …	GO:0003824 catalytic activity; GO:0005215 transporter activity; GO:0008324 cation transmembrane transporter activity; GO:0008553 proton-exporting ATPase activity, phosphorylative mechanism; GO:0015075 ion transmembrane transporter activity; GO:0015077 monovalent inorganic cation transmembrane transporter activity; GO:0015078 proton transmembrane transporter activity; GO:0015318 inorganic molecula…			C	KOG2957	Vacuolar H+-ATPase V0 sector, subunit d
Q5I0H9	Protein disulfide-isomerase A5 OS=Rattus norvegicus OX=10116 GN=Pdia5 PE=2 SV=1	Pdia5	0.6312	0.0154802	Down	59.399	15.1	8	8	1.87086	1.7622	1.89466	0.484104	0.355047	0.504433	0.757198	0.672164	0.699328	extracellular	K09583			GO:0006457 protein folding; GO:0006950 response to stress; GO:0006986 response to unfolded protein; GO:0007154 cell communication; GO:0007165 signal transduction; GO:0008152 metabolic process; GO:0009987 cellular process; GO:0010033 response to organic substance; GO:0023052 signaling; GO:0030968 endoplasmic reticulum unfolded protein response; GO:0033554 cellular response to stress; GO:0034620 ce…	GO:0005622 intracellular; GO:0005623 cell; GO:0005737 cytoplasm; GO:0005783 endoplasmic reticulum; GO:0005788 endoplasmic reticulum lumen; GO:0005789 endoplasmic reticulum membrane; GO:0012505 endomembrane system; GO:0016020 membrane; GO:0031974 membrane-enclosed lumen; GO:0031984 organelle subcompartment; GO:0042175 nuclear outer membrane-endoplasmic reticulum membrane network; GO:0043226 organe…	GO:0003756 protein disulfide isomerase activity; GO:0003824 catalytic activity; GO:0015036 disulfide oxidoreductase activity; GO:0015037 peptide disulfide oxidoreductase activity; GO:0016491 oxidoreductase activity; GO:0016667 oxidoreductase activity, acting on a sulfur group of donors; GO:0016853 isomerase activity; GO:0016860 intramolecular oxidoreductase activity; GO:0016864 intramolecular oxi…	PF00085	Thioredoxin	O	KOG0191	Thioredoxin/protein disulfide isomerase
Q63342	Dimethylglycine dehydrogenase, mitochondrial OS=Rattus norvegicus OX=10116 GN=Dmgdh PE=1 SV=1	Dmgdh	0.6424	0.0146101	Down	96.046	64.9	40	3	0.542855	0.554034	0.497797	0.921652	1.07815	0.89664	1.72571	1.51569	1.26747	mitochondria	K00315	DMGDH; dimethylglycine dehydrogenase [EC:1.5.8.4]	rno01100 Metabolic pathways; rno00260 Glycine, serine and threonine metabolism	GO:0001505 regulation of neurotransmitter levels; GO:0006082 organic acid metabolic process; GO:0006091 generation of precursor metabolites and energy; GO:0006575 cellular modified amino acid metabolic process; GO:0006576 cellular biogenic amine metabolic process; GO:0006725 cellular aromatic compound metabolic process; GO:0006730 one-carbon metabolic process; GO:0006732 coenzyme metabolic proces…	GO:0005622 intracellular; GO:0005623 cell; GO:0005737 cytoplasm; GO:0005739 mitochondrion; GO:0005759 mitochondrial matrix; GO:0031974 membrane-enclosed lumen; GO:0043226 organelle; GO:0043227 membrane-bounded organelle; GO:0043229 intracellular organelle; GO:0043231 intracellular membrane-bounded organelle; GO:0043233 organelle lumen; GO:0070013 intracellular organelle lumen;	GO:0000166 nucleotide binding; GO:0003824 catalytic activity; GO:0005488 binding; GO:0005542 folic acid binding; GO:0008144 drug binding; GO:0009055 electron transfer activity; GO:0016491 oxidoreductase activity; GO:0016645 oxidoreductase activity, acting on the CH-NH group of donors; GO:0019842 vitamin binding; GO:0031406 carboxylic acid binding; GO:0033218 amide binding; GO:0036094 small molecu…	PF01266; PF01571; PF08669	FAD dependent oxidoreductase; Aminomethyltransferase folate-binding domain; Glycine cleavage T-protein C-terminal barrel domain	E	KOG2844	Dimethylglycine dehydrogenase precursor
Q63704	Carnitine O-palmitoyltransferase 1, muscle isoform OS=Rattus norvegicus OX=10116 GN=Cpt1b PE=1 SV=1	Cpt1b	1.5732	0.0179315	Up	88.216	19.6	13	12	0.758437	1.16962	1.03561	1.47267	1.1292	1.08861	0.687872	0.797843	0.860136	cytoplasm	K19523	CPT1B; carnitine O-palmitoyltransferase 1, muscle isoform [EC:2.3.1.21]	rno04152 AMPK signaling pathway; rno04714 Thermogenesis; rno01212 Fatty acid metabolism; rno04931 Insulin resistance; rno04920 Adipocytokine signaling pathway; rno03320 PPAR signaling pathway; rno04922 Glucagon signaling pathway; rno00071 Fatty acid degradation	GO:0006082 organic acid metabolic process; GO:0006629 lipid metabolic process; GO:0006631 fatty acid metabolic process; GO:0006635 fatty acid beta-oxidation; GO:0006810 transport; GO:0006811 ion transport; GO:0006820 anion transport; GO:0006839 mitochondrial transport; GO:0006853 carnitine shuttle; GO:0006869 lipid transport; GO:0008152 metabolic process; GO:0009056 catabolic process; GO:0009062 …	GO:0005622 intracellular; GO:0005623 cell; GO:0005737 cytoplasm; GO:0005739 mitochondrion; GO:0005740 mitochondrial envelope; GO:0005741 mitochondrial outer membrane; GO:0016020 membrane; GO:0019867 outer membrane; GO:0031090 organelle membrane; GO:0031966 mitochondrial membrane; GO:0031967 organelle envelope; GO:0031968 organelle outer membrane; GO:0031975 envelope; GO:0043226 organelle; GO:0043…	GO:0003824 catalytic activity; GO:0004095 carnitine O-palmitoyltransferase activity; GO:0008374 O-acyltransferase activity; GO:0016406 carnitine O-acyltransferase activity; GO:0016409 palmitoyltransferase activity; GO:0016416 O-palmitoyltransferase activity; GO:0016740 transferase activity; GO:0016746 transferase activity, transferring acyl groups; GO:0016747 transferase activity, transferring ac…			I	KOG3716	Carnitine O-acyltransferase CPTI
Q66H28	Proton-activated chloride channel OS=Rattus norvegicus OX=10116 GN=Pacc1 PE=1 SV=1	Pacc1	1.6173	0.00889558	Up	40.072	12.3	4	4	1.05333	0.939767	1.05655	1.17127	1.05933	1.44625	0.771099	0.702749	0.799659	plasma membrane					GO:0005623 cell; GO:0009986 cell surface;
Q66HI5	Ferritin OS=Rattus norvegicus OX=10116 GN=Fth1 PE=1 SV=2	Fth1	0.664	0.000922058	Down	21.099	74.7	14	14	1.06543	0.994533	0.969599	0.791948	0.737111	0.853355	1.17914	1.16555	1.24334	cytoplasm	K00522	FTH1; ferritin heavy chain [EC:1.16.3.2]	rno04216 Ferroptosis; rno04978 Mineral absorption; rno04217 Necroptosis	GO:0000041 transition metal ion transport; GO:0002376 immune system process; GO:0006810 transport; GO:0006811 ion transport; GO:0006812 cation transport; GO:0006826 iron ion transport; GO:0006873 cellular ion homeostasis; GO:0006875 cellular metal ion homeostasis; GO:0006879 cellular iron ion homeostasis; GO:0006880 intracellular sequestering of iron ion; GO:0006955 immune response; GO:0008285 ne…	GO:0000323 lytic vacuole; GO:0005576 extracellular region; GO:0005622 intracellular; GO:0005623 cell; GO:0005737 cytoplasm; GO:0005764 lysosome; GO:0005767 secondary lysosome; GO:0005773 vacuole; GO:0005776 autophagosome; GO:0030139 endocytic vesicle; GO:0031410 cytoplasmic vesicle; GO:0031974 membrane-enclosed lumen; GO:0031982 vesicle; GO:0031983 vesicle lumen; GO:0043226 organelle; GO:0043227 …	GO:0005488 binding; GO:0005506 iron ion binding; GO:0043167 ion binding; GO:0043169 cation binding; GO:0046872 metal ion binding; GO:0046914 transition metal ion binding;	PF00210	Ferritin-like domain	P	KOG2332	Ferritin
Q6AYC4	Macrophage-capping protein OS=Rattus norvegicus OX=10116 GN=Capg PE=1 SV=1	Capg	1.6513	0.0112555	Up	38.798	37.5	9	8	1.22826	1.31313	1.21596	1.04943	1.06368	1.15213	0.792531	0.646355	0.538525	cytoplasm,nucleus	K10368			GO:0002376 immune system process; GO:0006950 response to stress; GO:0006952 defense response; GO:0006955 immune response; GO:0008064 regulation of actin polymerization or depolymerization; GO:0009987 cellular process; GO:0010033 response to organic substance; GO:0010639 negative regulation of organelle organization; GO:0016043 cellular component organization; GO:0022607 cellular component assembl…	GO:0005622 intracellular; GO:0005623 cell; GO:0005634 nucleus; GO:0005654 nucleoplasm; GO:0005730 nucleolus; GO:0005737 cytoplasm; GO:0005814 centriole; GO:0005815 microtubule organizing center; GO:0005819 spindle; GO:0005856 cytoskeleton; GO:0008290 F-actin capping protein complex; GO:0015629 actin cytoskeleton; GO:0015630 microtubule cytoskeleton; GO:0030139 endocytic vesicle; GO:0030496 midbod…	GO:0005488 binding; GO:0005515 protein binding; GO:0019904 protein domain specific binding; GO:0044877 protein-containing complex binding;	PF00626	Gelsolin repeat	Z	KOG0443	Actin regulatory proteins (gelsolin/villin family)
Q6DGF9	Acyl-CoA-binding domain-containing protein 4 OS=Rattus norvegicus OX=10116 GN=Acbd4 PE=1 SV=1	Acbd4	0.6131	0.00343266	Down	37.316	29.1	6	5	0.901044	0.807792	1.12847	0.823028	0.697617	0.821579	1.39384	1.28044	1.14619	cytoplasm							PF00887	Acyl CoA binding protein	I	KOG0817	Acyl-CoA-binding protein
Q8VI04	Isoaspartyl peptidase/L-asparaginase OS=Rattus norvegicus OX=10116 GN=Asrgl1 PE=1 SV=1	Asrgl1	0.6455	1.22792e-05	Down	34.41	48	12	12	0.976243	1.00842	0.921715	0.77171	0.80738	0.811401	1.22512	1.23333	1.24469	mitochondria	K13051	ASRGL1; L-asparaginase / beta-aspartyl-peptidase [EC:3.5.1.1 3.4.19.5]	rno01100 Metabolic pathways; rno00250 Alanine, aspartate and glutamate metabolism	GO:0006082 organic acid metabolic process; GO:0006508 proteolysis; GO:0006520 cellular amino acid metabolic process; GO:0006528 asparagine metabolic process; GO:0006530 asparagine catabolic process; GO:0006558 L-phenylalanine metabolic process; GO:0006559 L-phenylalanine catabolic process; GO:0006725 cellular aromatic compound metabolic process; GO:0006807 nitrogen compound metabolic process; GO:…	GO:0005622 intracellular; GO:0005623 cell; GO:0005737 cytoplasm; GO:0005829 cytosol;	GO:0003824 catalytic activity; GO:0004067 asparaginase activity; GO:0008233 peptidase activity; GO:0008238 exopeptidase activity; GO:0008242 omega peptidase activity; GO:0008798 beta-aspartyl-peptidase activity; GO:0016787 hydrolase activity; GO:0016810 hydrolase activity, acting on carbon-nitrogen (but not peptide) bonds; GO:0016811 hydrolase activity, acting on carbon-nitrogen (but not peptide)…	PF01112	Asparaginase	E	KOG1592	Asparaginase
Q9Z2Y0	Glycine N-acyltransferase-like protein Keg1 OS=Rattus norvegicus OX=10116 GN=Keg1 PE=1 SV=2	Keg1	0.6384	0.00198626	Down	34.016	58	14	13	1.01127	0.939003	1.00434	0.728747	0.8752	0.751715	1.27071	1.16446	1.25455	cytoplasm	K00628	GLYAT; glycine N-acyltransferase / glycine N-benzoyltransferase [EC:2.3.1.13 2.3.1.71]	rno01100 Metabolic pathways; rno00360 Phenylalanine metabolism		GO:0005622 intracellular; GO:0005623 cell; GO:0005737 cytoplasm; GO:0005739 mitochondrion; GO:0005813 centrosome; GO:0005815 microtubule organizing center; GO:0005856 cytoskeleton; GO:0015630 microtubule cytoskeleton; GO:0043226 organelle; GO:0043227 membrane-bounded organelle; GO:0043228 non-membrane-bounded organelle; GO:0043229 intracellular organelle; GO:0043231 intracellular membrane-bounded…	GO:0005488 binding; GO:0005515 protein binding; GO:0008092 cytoskeletal protein binding; GO:0015631 tubulin binding; GO:0043015 gamma-tubulin binding;
