# Supplementary material for: Proteomics-based screening of AKR1B1 as a therapeutic target and validation study for sepsis-associated acute kidney injury
Source: PeerJ journal article supplement (doi:10.7717/peerj.16709), 2024-01-02
Supplement: Raw_data.zip [file Figure 2B.xlsx]

## Sheet: Sheet1
AKR1B1	1	2	3		/β-actin	1	2	3	Mean		/sham	1	2	3	Mean
sham	10362.6	12992.1	12322.6			0.221273	0.284839	0.253319	0.253144			0.874099	1.12521	1.00069	1
CLP1/2	27287.2	27037.2	25046.3			0.614696	0.620301	0.537899				2.42825	2.45039	2.12488	2.3345
CLP3/4	42715.9	40610	40110.7			1.04983	1.02336	0.943584				4.14716	4.04259	3.72746	3.9724
β-actin
sham	46831.6	45612.1	48644.6
CLP1/2	44391.5	43587.2	46563.2
CLP3/4	40688.4	39683.2	42508.9
