# Supplementary material for: Proteomics-based screening of AKR1B1 as a therapeutic target and validation study for sepsis-associated acute kidney injury
Source: PeerJ journal article supplement (doi:10.7717/peerj.16709), 2024-01-02
Supplement: Raw_data.zip [file Figure 3A.xlsx]

## Sheet: BUN
BUN
	S	CLP	pre-ARI	post-ARI
	9.81366	15.7764	9.50311	8.32298
	6.95652	11.7391	10.6832	9.50311
	7.20497	10.8696	8.75776	8.9441
	6.08696	11.677	9.06832	7.95031
	6.89441	12.3602	6.77019	7.95031
	5.34161	12.2981	8.01242	8.88199
	5.2795	12.0497	6.58385	8.38509
	7.51553	10.3106	7.45342	7.45342
