# Supplementary material for: Proteomics-based screening of AKR1B1 as a therapeutic target and validation study for sepsis-associated acute kidney injury
Source: PeerJ journal article supplement (doi:10.7717/peerj.16709), 2024-01-02
Supplement: Raw_data.zip [file Figure 3B.xlsx]

## Sheet: Ccr
Ccr
	sham	CLP	pre-ARI	post-ARI
	27.0345	51.2852	32.6555	34.5559
	24.8128	52.0614	32.6287	34.5024
	28.2122	52.57	35.921	30.9424
	27.1415	54.3098	38.5977	32.3343
	27.6501	53.7477	33.1908	33.1373
	30.648	53.48	34.5024	29.8985
	31.6116	53.1856	31.2636	31.5313
	28.2122	56.4779	32.3878	33.4853
