# Supplementary material for: Proteomics-based screening of AKR1B1 as a therapeutic target and validation study for sepsis-associated acute kidney injury
Source: PeerJ journal article supplement (doi:10.7717/peerj.16709), 2024-01-02
Supplement: Raw_data.zip [file Figure 4A.xlsx]

## Sheet: IL-6 
IL-6
	sham	CLP	CLP+preARI	CLP+post-ARI
	28.2166	169.244	81.396	63.3407
	27.9518	331.9	60.5768	43.6982
	54.5104	316.331	49.1702	44.9399
	30.2296	158.656	33.9484	58.1568
	36.5556	102.516	53.6501	41.178
	44.3694	106.735	30.1655	58.4687
	29.694	93.1957	80.1271	56.035
	33.9121	105.411	56.02	103.136

## Sheet: IL-1β
IL-1β
	sham	CLP	CLP+preARI	CLP+post-ARI
	34.4179	67.5353	45.9039	45.8202
	33.464	73.0215	41.3357	42.475
	31.7832	66.5588	59.8525	35.9153
	31.8879	53.926	42.5509	36.9016
	33.0403	62.1236	49.1404	55.33
	35.4804	57.6011	50.4556	37.9587
	38.9273	65.9497	48.6373	49.0869
	31.2627	66.8372	55.1354	40.5766

## Sheet: TNFɑ
TNFɑ
	sham	CLP	CLP+preARI	CLP+post-ARI
	32.4676	55.2803	37.3992	39.2071
	26.638	50.7338	29.9109	38.7584
	35.5136	56.6669	44.8474	34.0366
	36.0318	55.506	38.5702	41.3999
	41.7314	56.6885	55.5167	32.2036
	34.0269	69.9127	44.845	30.2706
	36.4224	58.4489	48.7298	52.1332
	32.4572	67.0899	54.3312	43.3188
