# Supplementary material for: Proteomics-based screening of AKR1B1 as a therapeutic target and validation study for sepsis-associated acute kidney injury
Source: PeerJ journal article supplement (doi:10.7717/peerj.16709), 2024-01-02
Supplement: Raw_data.zip [file Figure 4B.xlsx]

## Sheet: IL-6
IL-6
	Sham	CLP	CLP+pre	CLP+post
	479.116	1212.1	548.95	996.486
	679.449	1767.78	1141.19	779.585
	613.433	2036.45	1201.26	1192.52
	692.138	1624.34	1336.76	1015.19
	788.486	1590.95	1213.38	1298.76
	730.957	1536.25	1372.69	1031.97
	815.66	1757.14	972.584	1362.66
	776.114	1189.68	1274.72	1220.38

## Sheet: IL-1β 
IL-1β
	Sham	CLP	CLP+pre	CLP+post
	204.887	137.711	267.956	359.372
	205.284	375.979	424.015	263.669
	227.247	606.61	359.833	235.109
	288.97	510.734	284.695	384.785
	306.391	508.043	286.331	405.813
	326.294	477.384	360.768	370.71
	281.112	541.167	441.16	679.016
	268.251	416.272	318.774	283.5

## Sheet: TNFɑ 
TNFɑ
	Sham	CLP	CLP+pre	CLP+post
	65.4145	153.404	102.739	99.1501
	71.5389	171.244	102.908	99.7497
	77.8038	160.171	126.444	89.2412
	91.2781	155.619	94.446	103.276
	64.3883	169.802	100.305	105.958
	69.1748	178.189	107.363	90.3072
	69.6893	177.707	112.966	98.3444
	76.9908	162.724	102.993	90.0828
