# Supplementary material for: Proteomics-based screening of AKR1B1 as a therapeutic target and validation study for sepsis-associated acute kidney injury
Source: PeerJ journal article supplement (doi:10.7717/peerj.16709), 2024-01-02
Supplement: Raw_data.zip [file Figure 5B.xlsx]

## Sheet: Sheet1
score
	sham	CLP	CLP+pre-ARI	CLP+post-ARI		degree of renal tubular injury
	1	4	3	2		scoring criteria: 0 for no injury; 1 for ≤25%; 2 for 26%-50%; 3 for 51%-75%; and 4 for >75%.
	1	4	3	3
	2	4	2	3		Five differing viewing fields were chosen for scoring every pathological section, and the data were statistically analyzed.
	1	4	2	3
	2	4	3	3
	0	3	3	3
	0	3	3	3
	0	3	3	2
	0	4	4	3
	1	4	4	3
	0	4	2	2
	0	4	2	1
	0	4	2	2
	0	4	3	2
	1	3	1	3
