# Supplementary material for: Proteomics-based screening of AKR1B1 as a therapeutic target and validation study for sepsis-associated acute kidney injury
Source: PeerJ journal article supplement (doi:10.7717/peerj.16709), 2024-01-02
Supplement: Raw_data.zip [file Figure 6A.xlsx]

## Sheet: pcr
	Group	AKR1B1			AVERAGE	β-actin			AVERAGE	ΔCt	ΔΔCt	2^-ΔΔCt
	Sham	29.67	30.95	29.56	30.06	21.62	21.36	21.45	21.4767	8.58333	-0.150417	1.10989
	Sham	31.52	30.96	31.08	31.1867	22.85	22.93	22.82	22.8667	8.32	-0.41375	1.33214
	Sham	27.48	27.39	27.09	27.32	18.31	18.26	18.33	18.3	9.02	0.28625	0.820031
	Sham	29.77	29.95	29.56	29.76	20.82	21.36	21.45	21.21	8.55	-0.18375	1.13583
	Sham	24.53	23.95	23.51	23.9967	14.97	14.72	14.76	14.8167	9.18	0.44625	0.733948
	Sham	24.9	24.02	23.23	24.05	15.06	14.9	14.85	14.9367	9.11333	0.379583	0.76866
	Sham	23.6	23.21	23.02	23.2767	14.95	14.82	14.88	14.8833	8.39333	-0.340417	1.26612
	Sham	23.57	24.12	23.37	23.6867	15.04	14.91	14.98	14.9767	8.71	-0.02375	1.0166
										8.73375
	CLP	27.55	27.42	27.36	27.4433	19.78	19.7	19.82	19.7667	7.67667	-1.05708	2.08072
	CLP	25.69	25.65	25.46	25.6	17.51	17.5	17.54	17.5167	8.08333	-0.650417	1.56962
	CLP	25.52	25.4	25.33	25.4167	17.72	17.7	17.81	17.7433	7.67333	-1.06042	2.08553
	CLP	24.64	24.6	24.47	24.57	16.88	16.82	16.95	16.8833	7.68667	-1.04708	2.06635
	CLP	23.14	23.18	23.04	23.12	15.77	15.72	15.83	15.7733	7.34667	-1.38708	2.61549
	CLP	22.95	22.95	22.82	22.9067	14.99	14.95	14.93	14.9567	7.95	-0.78375	1.7216
	CLP	22.63	22.46	22.31	22.4667	14.58	14.52	14.49	14.53	7.93667	-0.797083	1.73758
	CLP	24.2	24.05	24.18	24.1433	16.45	16.52	16.68	16.55	7.59333	-1.14042	2.20445
	CLP+pre-ARI	26.29	26.18	26.13	26.2	18.14	17.96	17.99	18.03	8.17	-0.56375	1.47811
	CLP+pre-ARI	26.46	26.63	26.53	26.54	18.06	18.06	17.96	18.0267	8.51333	-0.220417	1.16507
	CLP+pre-ARI	25.34	25.31	25.4	25.35	17.11	17	17.17	17.0933	8.25667	-0.477083	1.39193
	CLP+pre-ARI	26.07	25.86	26.23	26.0533	17.78	17.52	17.61	17.6367	8.41667	-0.317083	1.24581
	CLP+pre-ARI	23.06	22.79	22.72	22.8567	14.86	14.75	14.66	14.7567	8.1	-0.63375	1.55159
	CLP+pre-ARI	24.08	23.7	23.33	23.7033	15.35	15.1	15.38	15.2767	8.42667	-0.307083	1.2372
	CLP+pre-ARI	23.21	23.32	23.48	23.3367	14.71	14.68	14.54	14.6433	8.69333	-0.0404167	1.02841
	CLP+pre-ARI	23.15	23.56	23.99	23.5667	15.15	15.39	15.06	15.2	8.36667	-0.367083	1.28974
	CLP+post-ARI	26.97	26.99	26.91	26.9567	18.56	18.58	18.59	18.5767	8.38	-0.35375	1.27788
	CLP+post-ARI	26.12	26.18	26.22	26.1733	17.91	17.93	17.8	17.88	8.29333	-0.440417	1.357
	CLP+post-ARI	26.63	26.79	26.88	26.7667	18.61	18.63	18.67	18.6367	8.13	-0.60375	1.51966
	CLP+post-ARI	26.23	26.64	26.79	26.5533	17.97	18.37	18.03	18.1233	8.43	-0.30375	1.23435
	CLP+post-ARI	23.57	23.87	23.95	23.7967	15.35	15.33	15.94	15.54	8.25667	-0.477083	1.39193
	CLP+post-ARI	23.13	23.29	23.09	23.17	14.75	14.83	14.85	14.81	8.36	-0.37375	1.29572
	CLP+post-ARI	23.12	23.89	23.97	23.66	15.15	15.16	15.1	15.1367	8.52333	-0.210417	1.15702
	CLP+post-ARI	23.44	22.97	22.89	23.1	14.91	14.78	14.94	14.8767	8.22333	-0.510417	1.42446
