# Supplementary material for: Proteomics-based screening of AKR1B1 as a therapeutic target and validation study for sepsis-associated acute kidney injury
Source: PeerJ journal article supplement (doi:10.7717/peerj.16709), 2024-01-02
Supplement: Raw_data.zip [file Figure 6c.xls]

## Sheet: Sheet1
PKC					/actin				Mean		/sham				Mean
Sham	24677.5	24962.2	24672.2			0.609537	0.597306	0.594944	0.600596			1.01489	0.994523	0.99059	1
CLP	42552.7	43260.5	42800.7			1.07531	1.06965	1.06825				1.79041	1.78097	1.77865	1.78335
CLP+pre-ARI	24008.6	24315	24043.6			0.590396	0.584329	0.583423				0.983017	0.972916	0.971408	0.97578
CLP+post-ARI	20468.1	19646.7	18511.9			0.477265	0.472556	0.444056				0.794653	0.786812	0.739359	0.773608
p65
Sham	30343.9	31099.6	31099.6			0.749498	0.744165	0.749935	0.747866			1.00218	0.995051	1.00277	1
CLP	40163.5	40273	40273			1.01494	0.995779	1.00516				1.35711	1.33149	1.34404	1.34422
CLP+pre-ARI	26718	26874.6	26874.6			0.657024	0.645841	0.652118				0.878531	0.863578	0.871972	0.871361
CLP+post-ARI	20657.6	20568.5	16568.5			0.481683	0.494729	0.397437				0.644077	0.66152	0.531428	0.612342
AKR1B1
Sham	26360.5	26092.2	25412.8			0.651108	0.624346	0.612804	0.629419			1.03446	0.991939	0.973603	1
CLP	41855.3	41329.3	39964.4			1.05769	1.0219	0.99746				1.68042	1.62356	1.58473	1.62957
CLP+pre-ARI	21773.2	21554.6	18658.8			0.535427	0.517994	0.452762				0.850668	0.822971	0.719333	0.797657
CLP+post-ARI	17864.4	19864.1	20940.2			0.416554	0.477786	0.502303				0.661806	0.75909	0.798042	0.739646
b-actin
Sham	40485.6	41791.3	41469.7
CLP	39572.5	40443.7	40066.2
CLP+pre-ARI	40665.2	41611.7	41211.2
CLP+post-ARI	42886.3	41575.3	41688.3
